# Supplementary material for: Hyperuricemia is independently associated with endothelial dysfunction in postmenopausal women but not in premenopausal women
Source: PubMed Central journal article supplement — BMJ Open. 2013 Nov 8;3(11):e003659. doi: 10.1136/bmjopen-2013-003659 (PMC3822312; doi:10.1136/bmjopen-2013-003659), 2013-11-08
Supplement: bmjopen-2013-003659.draft_revisions.pdf [file bmjopen-2013-003659.draft_revisions.pdf]

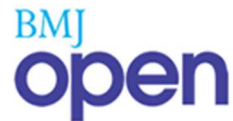

**Hyperuricemia is Independently Associated with Endothelial Dysfunction in Postmenopausal Women but not in Premenopausal Women**

|                                 |                                                                                                                                                                                                                                                                                                                                                                                                                                                                                                                                                                                                                                                                                                                                                                                                                                                                                                                                                                                                                                                                                                                                                                                                                                                                                                                                                                                                                                                                                                                                                                                                                                                                                                                                                                                                                                                                                                                                                                                                                                                                                                                                                                    |
|---------------------------------|--------------------------------------------------------------------------------------------------------------------------------------------------------------------------------------------------------------------------------------------------------------------------------------------------------------------------------------------------------------------------------------------------------------------------------------------------------------------------------------------------------------------------------------------------------------------------------------------------------------------------------------------------------------------------------------------------------------------------------------------------------------------------------------------------------------------------------------------------------------------------------------------------------------------------------------------------------------------------------------------------------------------------------------------------------------------------------------------------------------------------------------------------------------------------------------------------------------------------------------------------------------------------------------------------------------------------------------------------------------------------------------------------------------------------------------------------------------------------------------------------------------------------------------------------------------------------------------------------------------------------------------------------------------------------------------------------------------------------------------------------------------------------------------------------------------------------------------------------------------------------------------------------------------------------------------------------------------------------------------------------------------------------------------------------------------------------------------------------------------------------------------------------------------------|
| Journal:                        | <i>BMJ Open</i>                                                                                                                                                                                                                                                                                                                                                                                                                                                                                                                                                                                                                                                                                                                                                                                                                                                                                                                                                                                                                                                                                                                                                                                                                                                                                                                                                                                                                                                                                                                                                                                                                                                                                                                                                                                                                                                                                                                                                                                                                                                                                                                                                    |
| Manuscript ID:                  | bmjopen-2013-003659                                                                                                                                                                                                                                                                                                                                                                                                                                                                                                                                                                                                                                                                                                                                                                                                                                                                                                                                                                                                                                                                                                                                                                                                                                                                                                                                                                                                                                                                                                                                                                                                                                                                                                                                                                                                                                                                                                                                                                                                                                                                                                                                                |
| Article Type:                   | Research                                                                                                                                                                                                                                                                                                                                                                                                                                                                                                                                                                                                                                                                                                                                                                                                                                                                                                                                                                                                                                                                                                                                                                                                                                                                                                                                                                                                                                                                                                                                                                                                                                                                                                                                                                                                                                                                                                                                                                                                                                                                                                                                                           |
| Date Submitted by the Author:   | 25-Jul-2013                                                                                                                                                                                                                                                                                                                                                                                                                                                                                                                                                                                                                                                                                                                                                                                                                                                                                                                                                                                                                                                                                                                                                                                                                                                                                                                                                                                                                                                                                                                                                                                                                                                                                                                                                                                                                                                                                                                                                                                                                                                                                                                                                        |
| Complete List of Authors:       | <p>Maruhashi, Tatsuya; Hiroshima University Graduate School of Biomedical Sciences, Department of Cardiovascular Medicine<br/> Nakashima, Ayumu; Hiroshima University Hospital, Division of Regeneration and Medicine<br/> Soga, Junko; Hiroshima University Graduate School of Biomedical Sciences, Department of Cardiovascular Medicine<br/> Fujimura, Noritaka; Hiroshima University Graduate School of Biomedical Sciences, Department of Cardiovascular Medicine<br/> Idei, Naomi; Hiroshima University Graduate School of Biomedical Sciences, Department of Cardiovascular Medicine<br/> Mikami, Shinsuke; Hiroshima University Graduate School of Biomedical Sciences, Department of Cardiovascular Medicine<br/> Iwamoto, Yumiko; Hiroshima University Graduate School of Biomedical Sciences, Department of Cardiovascular Medicine<br/> Kajikawa, Masato; Hiroshima University Graduate School of Biomedical Sciences, Department of Cardiovascular Medicine<br/> Matsumoto, Takeshi; Hiroshima University Graduate School of Biomedical Sciences, Department of Cardiovascular Medicine<br/> Hidaka, Takayuki; Hiroshima University Graduate School of Biomedical Sciences, Department of Cardiovascular Medicine<br/> Kihara, Yasuki; Hiroshima University Graduate School of Biomedical Sciences, Department of Cardiovascular Medicine<br/> Chayama, Kazuaki; Hiroshima University Graduate School of Biomedical Sciences, Department of Medicine and Molecular Science<br/> Goto, Chikara; Hiroshima International University,<br/> Noma, Kensuke; Hiroshima University, Department of Cardiovascular Regeneration and Medicine, Research Institute for Radiation Biology and Medicine<br/> Tomiya, Hirofumi; Tokyo Medical University, The Second Department of Internal Medicine<br/> Takase, Bonpei; National Defense Medical College Research Institute, Tokorozawa, Division of Biomedical Engineering<br/> Yamashina, Akira; Tokyo Medical University, The Second Department of Internal Medicine<br/> Higashi, Yukihito; Research Institute for Radiation Biology and Medicine, Department of Cardiovascular Regeneration and Medicine</p> |
| <b>Primary Subject Heading</b>: | Cardiovascular medicine                                                                                                                                                                                                                                                                                                                                                                                                                                                                                                                                                                                                                                                                                                                                                                                                                                                                                                                                                                                                                                                                                                                                                                                                                                                                                                                                                                                                                                                                                                                                                                                                                                                                                                                                                                                                                                                                                                                                                                                                                                                                                                                                            |

1  
2  
3  
4  
5  
6  
7  
8  
9  
10  
11  
12  
13  
14  
15  
16  
17  
18  
19  
20  
21  
22  
23  
24  
25  
26  
27  
28  
29  
0  
3  
2  
3  
3  
5  
6  
3  
8  
9  
40  
41  
42  
43  
44  
45  
46  
47  
48  
49  
0  
5  
2  
3  
5  
6  
3  
8  
9  
60

|                            |                                                                                |
|----------------------------|--------------------------------------------------------------------------------|
| Secondary Subject Heading: | Diabetes and endocrinology                                                     |
| Keywords:                  | VASCULAR MEDICINE, PATHOLOGY, General endocrinology < DIABETES & ENDOCRINOLOGY |
|                            |                                                                                |

SCHOLARONE™  
Manuscripts

For peer review only

## Hyperuricemia is Independently Associated with Endothelial Dysfunction in Postmenopausal Women but not in Premenopausal Women

Brief title: Hyperuricemia and endothelial function in women

Tatsuya Maruhashi, MD;<sup>1</sup> Ayumu Nakashima, MD, PhD;<sup>2</sup> Junko Soga MD, PhD;<sup>1</sup> Noritaka Fujimura, MD, PhD;<sup>1</sup> Naomi Idei, MD, PhD;<sup>1</sup> Shinsuke Mikami, MD;<sup>1</sup> Yumiko Iwamoto, MD;<sup>1</sup> Masato Kajikawa, MD;<sup>1</sup> Takeshi Matsumoto, MD;<sup>1</sup> Takayuki Hidaka, MD, PhD;<sup>1</sup> Yasuki Kihara, MD, PhD;<sup>1</sup> Kazuaki Chayama, MD, PhD;<sup>3</sup> Chikara Goto, PhD;<sup>4</sup> Kensuke Noma, MD, PhD;<sup>5</sup> Hirofumi Tomiyama, MD, PhD, FAHA;<sup>6</sup> Bonpei Takase, MD, PhD, FAHA;<sup>7</sup> Akira Yamashina, MD, PhD;<sup>6</sup> Yukihiro Higashi, MD, PhD, FAHA<sup>2,5</sup>

<sup>1</sup>Department of Cardiovascular Medicine, Hiroshima University Graduate School of Biomedical Sciences, Hiroshima, Japan

<sup>2</sup>Division of Regeneration and Medicine, Hiroshima University Hospital, Hiroshima, Japan

<sup>3</sup>Department of Medicine and Molecular Science, Hiroshima University Graduate School of Biomedical Sciences, Hiroshima, Japan

<sup>4</sup>Hiroshima International University, Hiroshima, Japan

<sup>5</sup>Department of Cardiovascular Regeneration and Medicine, Research Institute for Radiation Biology and Medicine, Hiroshima University, Hiroshima, Japan

<sup>6</sup>The Second Department of Internal Medicine, Tokyo Medical University, Tokyo, Japan

<sup>7</sup>Division of Biomedical Engineering, National Defense Medical College Research Institute, Tokorozawa, Japan

Address for corresponding: Yukihiro Higashi, MD, PhD, FAHA

Professor and Chair

Department of Cardiovascular Regeneration and Medicine,  
Research Institute for Radiation Biology and Medicine (RIRBM),  
Hiroshima University

1-2-3 Kasumi, Minami-ku, Hiroshima 734-8553, Japan

Fax: +81-82-257-5831, Phone: +81-82-257-5831

E-mail: [yhigashi@hiroshima-u.ac.jp](mailto:yhigashi@hiroshima-u.ac.jp)

Key words: uric acid, endothelial function, flow-mediated vasodilation, menopause

1  
2  
3  
4  
5  
6  
7  
8  
9  
10  
11  
12  
13  
14  
15  
16  
17  
18  
19  
20  
21  
22  
23  
24  
25  
26  
27  
28  
29  
0  
3  
2  
3  
3  
5  
6  
3  
8  
9  
40  
41  
42  
43  
44  
45  
46  
47  
48  
49  
0  
5  
2  
3  
5  
6  
3  
8  
9  
60

Word count: 3341 words

For peer review only

## Abstract

**Objectives:** The purpose of this study was to determine the relationships between uric acid, endothelial function, and cardiovascular risk factors in women without established cardiovascular disease.

**Design:** Cross-sectional study.

**Setting:** Three general hospitals in Japan.

**Participants:** 749 Japanese women aged 30 to 74 years recruited from people who underwent health-screening examinations with agreement for measurement of vascular function.

**Measures:** We measured serum concentrations of uric acid and flow-mediated vasodilation (FMD). Percent of FMD (Peak diameter-Baseline diameter/Baseline diameter) was used for analysis. Endothelial dysfunction was defined as FMD equal to or less than 4.90%, division point for the lowest tertile and the middle tertile of FMD. Menopause women were defined as subjects without menstruation for over 1 year or subjects with a history of hysterectomy or bilateral oophorectomy.

**Results:** Of the 749 subjects, 368 (49.1%) were premenopausal and 381 (50.9%) were postmenopausal women. Age, body mass index, systolic blood pressure, total cholesterol, triglycerides, glucose, estimated glomerular filtration, and Framingham risk score were significantly correlated with serum uric acid level. FMD showed a gradual decrease in accordance with the serum uric acid level (<4.0 mg/dL, 6.85±3.65%; 4.0 to <5.0 mg/dL, 6.79±3.60%; 5.0 to <6.0 mg/dL, 6.24±3.58%; ≥6.0 mg/dL, 5.27±3.18%; P=0.01). Multivariate analysis revealed that uric acid was a significantly independent risk factor for endothelial dysfunction in postmenopausal women (odds ratio; 8.04, 95% CI; 1.68-40.9), but not in premenopausal women.

**Conclusions:** These findings suggest that uric acid can be used as a risk marker of

1  
2  
3  
4  
5  
6  
7  
8  
9  
10  
11  
12  
13  
14  
15  
16  
17  
18  
19  
20  
21  
22  
23  
24  
25  
26  
27  
28  
29  
0  
3  
2  
3  
3  
5  
6  
3  
8  
9  
40  
41  
42  
43  
44  
45  
46  
47  
48  
49  
0  
5  
2  
3  
5  
6  
3  
8  
9  
60

endothelial dysfunction. As a causal cardiovascular risk factor, uric acid may be an independent risk factor for endothelial dysfunction in postmenopausal women, but not in premenopausal women.

For peer review only

## Article summary

### Article focus:

- To investigate the relationships between uric acid, endothelial function assessed by flow-mediated vasodilation (FMD), and cardiovascular risk factors in women without established cardiovascular disease.
- To examine whether menopausal status is associated with the relationship between uric acid and endothelial function in women without established cardiovascular disease.

### Key messages

- Uric acid level was significantly associated with cardiovascular parameters and prevalence of cardiovascular risk factors.
- FMD showed a gradual decrease in accordance with the serum uric acid level.
- Uric acid was an independent risk factor for endothelial dysfunction even after adjustment for other cardiovascular risk factors in postmenopausal women, but not in premenopausal women.

### Strengths and limitations of this study

- This study includes a large number of women who underwent flow-mediated vasodilation test.
- This study shows a difference in the relationship between uric acid and endothelial dysfunction depending on menopausal status in women without established cardiovascular disease.
- Residual confounding may exist for this cross-sectional study.
- Menopausal status was based on self-report.

## Introduction

Several epidemiological studies have shown a relationship between serum uric acid level and subsequent cardiovascular disease.[1-10] In addition, increase in uric acid level is regarded as an independent marker of increased cardiovascular risk. However, it has remained controversial whether uric acid per se should be considered as a cardiovascular risk factor because of the difficulty in investigating the role of uric acid alone in the pathogenesis, development, and maintenance of atherosclerosis. There are significant relationships between elevated uric acid levels and established cardiovascular risk factors, such as hypertension,[11] metabolic syndrome[12] and kidney disease,[13] all of which are also well known as strong predictors of cardiovascular disease.[14 15] Some investigators have argued that elevated uric acid is not an independent risk factor but rather merely a marker of risk for cardiovascular disease.<sup>1,6,7</sup> However, recent epidemiological studies have demonstrated that uric acid is an independent risk factor for cardiovascular disease.[5 7-10] Although the mechanism by which uric acid causes cardiovascular disease is not fully understood, several lines of evidence suggest that elevated uric acid impairs endothelial function by inducing intracellular oxidative stress and inflammation.[16-18]

Endothelial dysfunction is established in the initial step of atherosclerosis and plays an important role in the development of atherosclerotic conditions, leading to cardiovascular outcomes.[19] Recently, measurement of flow-mediated vasodilation (FMD) as an index of endothelium-dependent vasodilation has been widely used as a method for assessing endothelial function.[20-24] In addition, growing evidence has shown that endothelial function assessed by FMD can serve as an independent predictor of cardiovascular events.[25-28] Recently, several investigators, including us, have shown a relationship between uric acid and endothelial function assessed by



1  
2  
3  
4 FMD.[29-34] As for the relationship between uric acid and FMD in men, previous  
5 studies are consistent in demonstrating that uric acid is a significant independent risk  
6 factor for FMD.[29 34] However, there is little information on whether uric acid is an  
7 independent risk factor for endothelial dysfunction in women. In addition, it remains  
8 unclear whether menopausal status is associated with the relationship between uric acid  
9 and endothelial function. It is clinically important to confirm the role of uric acid per se  
10 in atherosclerosis. We therefore investigated the relationships between uric acid, FMD  
11 and cardiovascular risk factors in women without established cardiovascular diseases  
12 who underwent health-screening examinations.  
13  
14  
15  
16  
17  
18  
19  
20  
21  
22  
23  
24  
25  
26

## 27 **Methods**

### 28 **Subjects**

29  
30 A total of 5321 Japanese adults aged 17 to 86 years who underwent health-screening  
31 examinations with agreement for measurement of vascular function were enrolled in the  
32 Flow-mediated Dilation Japan Registry between 1 April 2010 and 31 August 2012 at 3  
33 general hospitals in Japan. All employees have an obligation to undergo health  
34 screening every year under the regulations of the Society-managed Health Insurance  
35 Union in Japan. In accordance with the regulations, we performed health-screening  
36 examinations. From the registry, 895 women aged 30 to 74 years were recruited for this  
37 study. Among the 895 subjects, information on serum uric acid levels, menopause, and  
38 phases of menstrual was available for 797 subjects. Subjects during menstruation  
39 (n=28), subjects receiving hormone replacement therapy (n=3), one subject who was  
40 pregnant, subjects with established cardiovascular diseases (n=15), and one subject who  
41 was being treated with an antihyperuricemic drug were excluded. Finally, 749 women  
42 without cardiovascular diseases were enrolled in this study. Hypertension was defined  
43  
44  
45  
46  
47  
48  
49  
50  
51  
52  
53  
54  
55  
56  
57  
58  
59  
60

1  
2  
3  
4 as systolic blood pressure of  $\geq 140$  mm Hg or diastolic blood pressure of  $\geq 90$  mm Hg,  
5  
6 in a sitting position, on at least 3 different occasions. Patients with secondary forms of  
7  
8 hypertension were excluded in all patients with hypertension on the basis of complete  
9  
10 history; physical examination; radiological and ultrasound examinations; urinalysis;  
11  
12 plasma rennin activity; plasma aldosterone and norepinephrine concentrations; serum  
13  
14 creatinine, potassium, calcium, and free throxine concentrations; and 24-hour urinary  
15  
16 excretion of 17-hydroxycorticosteroids, 17-ketogenic steroids, and vanillymandelic acid.  
17  
18 Diabetes was defined according to the American Diabetes Association.[35]  
19  
20 Dyslipidemia was defined according to the third report of the National Cholesterol  
21  
22 Education Program (NCEP) Expert Panel on Detection, Evaluation, and Treatment of  
23  
24 High Blood Cholesterol in Adults (ATP-III).[36] We defined smokers as those who were  
25  
26 current smokers. Measurement of FMD was performed without withholding  
27  
28 medications. Framingham risk score was calculated by points of risk factors: age, total  
29  
30 cholesterol level, high-density lipoprotein cholesterol level, systolic blood pressure, and  
31  
32 smoking status.[37] Diagnosis of metabolic syndrome was made according to the  
33  
34 criteria of NCEP ATP-III.[36] Thus, metabolic syndrome was diagnosed when 3 or  
35  
36 more of the following risk determinants were present. (1) waist circumference of  $\geq 88$   
37  
38 cm, (2) triglyceride  $\geq 1.7$  mmol/L (150 mg/dL), (3) high-density lipoprotein cholesterol  
39  
40  $< 1.29$  mmol/L (50 mg/dL), (4) blood pressure  $\geq 130$  and/or 85 mm Hg, or (5) fasting  
41  
42 blood glucose  $\geq 6.11$  mmol/L (110 mg/dL). The estimated glomerular filtration rate  
43  
44 (eGFR) was calculated using the Japanese eGER equation.[38] Chronic kidney disease  
45  
46 (CKD) was defined as eGFR  $< 60$  mL/min/1.73 m<sup>2</sup>. [39] Menopause women were  
47  
48 defined as subjects without menstruation for over 1 year or subjects with a history of  
49  
50 hysterectomy or bilateral oophrectomy. The ethical committees of our institutions  
51  
52 approved the study protocol. Written informed consent for participation in the study was  
53  
54  
55  
56  
57  
58  
59  
60

obtained from all subjects.

### Study protocol

We measured vascular responses to reactive hyperemia in the brachial artery in all subjects. Subjects fasted the previous night for at least 12 hours. The study began at 8:30 AM. The subjects were kept in the supine position in a quiet, dark, air-conditioned room (constant temperature of 22°C to 25°C) throughout the study. After remaining in the supine position for 30 minutes, blood samples were obtained for measurement of basal fasting serum concentrations of total cholesterol, triglycerides, high-density lipoprotein cholesterol, low-density lipoprotein cholesterol, creatinine, glucose, and uric acid. Then FMD was measured. The observers were blind to the form of examination.

### Measurement of FMD

The subjects remained supine throughout the study. The vascular response to reactive hyperemia in the brachial artery was used for assessment of endothelium-dependent FMD. A high-resolution linear artery transducer was coupled to computer-assisted analysis software (UNEXEF18G, UNEX Co., Nagoya, Japan) that used an automated edge detection system for measurement of brachial artery diameter. A blood pressure cuff was placed around the forearm. The brachial artery was scanned longitudinally 5 to 10 cm above the elbow. When the clearest B-mode image of the anterior and posterior intimal interfaces between the lumen and vessel wall was obtained, the transducer was held at the same point throughout the scan by a special probe holder (UNEX Co.) to ensure consistency of the image. Depth and gain setting were set to optimize the images of the arterial lumen wall interface. When the tracking gate was placed on the intima, the artery diameter was automatically tracked, and the waveform of diameter changes

1  
2  
3  
4 over the cardiac cycle was displayed in real time using the FMD mode of the tracking  
5 system. This allowed the ultrasound images to be optimized at the start of the scan and  
6 the transducer position to be adjusted immediately for optimal tracking performance  
7 throughout the scan. Pulsed Doppler flow was assessed at baseline and during peak  
8 hyperemic flow, which was confirmed to occur within 15 seconds after cuff deflation.  
9 Blood flow velocity was calculated from the Doppler data and was displayed as a  
10 waveform in real time. The baseline longitudinal image of the artery was acquired for  
11 30 seconds, and then the blood pressure cuff was inflated to 50 mm Hg above systolic  
12 pressure for 5 minutes. The longitudinal image of the artery was recorded continuously  
13 until 5 minutes after cuff deflation. Pulsed Doppler velocity signals were obtained for  
14 20 seconds at baseline and for 10 seconds immediately after cuff deflation. Changes in  
15 brachial artery diameter were immediately expressed as percentage change relative to  
16 the vessel diameter before cuff inflation. FMD was automatically calculated as the  
17 percentage change in peak vessel diameter from the baseline value. Percentage of FMD  
18 (peak diameter-baseline diameter/baseline diameter) was used for analysis. Blood flow  
19 volume was calculated by multiplying the Doppler flow velocity (corrected for the  
20 angle) by heart rate and vessel cross-sectional area ( $\pi r^2$ ). Reactive hyperemia was  
21 calculated as the maximum percentage increase in flow after cuff deflation compared  
22 with baseline flow.  
23  
24  
25  
26  
27  
28  
29  
30  
31  
32  
33  
34  
35  
36  
37  
38  
39  
40  
41  
42  
43  
44  
45  
46  
47  
48  
49

### 50 **Statistical analysis**

51 Results are presented as mean $\pm$ SD. All reported probability values were 2-sided, and a  
52 probability value of  $<0.05$  was considered statistically significant. Categorical variables  
53 were compared by means of chi-square test. Relations between variables were  
54 determined by Spearman correlation coefficients analysis. Multivariate logistic  
55  
56  
57  
58  
59  
60

1  
2  
3  
4  
5 regression analyses were performed to identify factors associated with endothelial  
6  
7 dysfunction in risk factors and laboratory data. The data were processed using the  
8  
9 software package Stata version 9 (Stata Co., College Station, Texas, USA).

## 10 11 12 13 **Results**

### 14 15 **Baseline clinical characteristics**

16  
17 The baseline clinical characteristics are summarized in Table 1. Of the 749 subjects, 112  
18 (15.0%) had hypertension, 262 (35.0%) had dyslipidemia, 34 (4.5%) had diabetes  
19 mellitus, 59 (7.9%) were current smokers, 65 (8.7%) had metabolic syndrome, and 56  
20 (8.4%) had chronic kidney disease. Mean Framingham risk score was  $3.94 \pm 3.62\%$ . The  
21 mean value of serum uric acid level was  $4.44 \pm 1.09$  mg/dL (median, 4.30 mg/dL;  
22 interquartile range, 3.80-5.00 mg/dL; range, 0.80 to 10.0 mg/dL). The mean value of  
23 FMD was  $6.59 \pm 3.60\%$  (range, -4.70 to 20.1%). Division point for the lowest tertile and  
24 the middle tertile of FMD was 4.90%. Therefore, endothelial dysfunction was defined  
25 as FMD equal or less than 4.90%.  
26  
27  
28  
29  
30  
31  
32  
33  
34  
35  
36  
37  
38  
39  
40  
41  
42  
43  
44  
45  
46  
47  
48  
49  
50  
51  
52  
53  
54  
55  
56  
57  
58  
59  
60

### 40 41 **Relationships between serum uric acid level and cardiovascular risk factors**

42  
43 Subjects were categorized according to serum uric acid levels (Table 2). Age, body mass  
44 index, systolic blood pressure, total cholesterol, triglycerides, glucose, and Framingham  
45 risk score were significantly increased and eGFR was significantly decreased with  
46 increase in serum uric acid level. As for the prevalence of cardiovascular risk factors,  
47 there were significant increases in the prevalence of hypertension, dyslipidemia, current  
48 smoking, metabolic syndrome, chronic kidney disease, and menopause in relation to  
49 increase in serum uric acid level.  
50  
51  
52  
53  
54  
55  
56  
57  
58  
59  
60

### Relationships between serum uric acid level and FMD

Subjects were categorized into 4 groups on the basis of serum uric acid level. FMD was significantly decreased with increase in serum uric acid level (<4.0 mg/dL, 6.85±3.65%; 4.0 to <5.0 mg/dL, 6.79±3.60%; 5.0 to <6.0 mg/dL, 6.24±3.58%; ≥6.0 mg/dL, 5.27±3.18%; P for trend = 0.01, Figure 1). Multiple logistic regression analysis revealed that serum uric acid level was significantly associated with endothelial dysfunction after adjustment for age (odds ratio, 5.23; 95% CI, 1.36 to 20.4) (Table 3). However, after adjustment for other risk factors, including body mass index, systolic blood pressure, total cholesterol, glucose, smoking status, eGFR, and brachial artery diameter, the significant association between serum uric acid level and endothelial dysfunction disappeared (odds ratio, 2.07; 95% CI, 0.47 to 9.23).

### Difference in the relationship between serum uric acid level and endothelial dysfunction according to menopausal status

Subjects were divided into two groups according to menopausal status to investigate the influence of menopause on the relationship between serum uric acid level and endothelial function (supplemental Table I). Of the 749 subjects, 368 (49.1%) were premenopausal and 381 (50.9%) were postmenopausal women. Postmenopausal women were significantly older than premenopausal women (58.6±6.3 vs. 41.5±6.1 years, P<0.001). The ages ranged from 30 to 54 years in premenopausal women and 31 to 74 years in postmenopausal women. Serum uric acid level was significantly higher in postmenopausal women than in premenopausal women (4.64±1.11 vs. 4.24±1.03 mg/dL, P<0.001). FMD was significantly impaired in postmenopausal women compared to that in premenopausal women (5.51±3.14 vs. 7.77±3.71%, P<0.001), and the prevalence of endothelial dysfunction was significantly higher in postmenopausal women than

1  
2  
3  
4 premenopausal women (66.4% vs. 34.0%,  $P < 0.001$ ). In postmenopausal women,  
5  
6 multiple logistic regression analysis revealed that serum uric acid level was significantly  
7  
8 associated with endothelial dysfunction after adjustment for age (odds ratio, 7.33; 95%  
9  
10 CI, 1.48 to 38.1) (Table 4). The significant association between serum uric acid level  
11  
12 and endothelial dysfunction persisted after adjustment for other risk factors (odds ratio,  
13  
14 8.04; 95% CI, 1.68 to 40.9). In contrast, there was no significant association between  
15  
16 serum uric acid level and endothelial dysfunction in premenopausal women (odds ratio,  
17  
18 2.98; 95% CI, 0.39 to 21.7) (Table 4). After adjustment for other risk parameters, the  
19  
20 association between uric acid level and endothelial dysfunction remained insignificant  
21  
22 (odds ratio, 0.13; 95% CI, 0.01 to 1.40).  
23  
24  
25  
26  
27  
28  
29

### Discussion

0  
1 In the present study, we demonstrated that uric acid level was significantly associated  
2  
3 with cardiovascular parameters and prevalence of cardiovascular risk factors. Although  
4  
5 FMD showed a graded decrease according to serum uric acid level, uric acid was not an  
6  
7 independent risk factor for endothelial dysfunction after adjustment for other  
8  
9 cardiovascular risk parameters. However, when subjects were divided into two groups  
10  
11 according to menopausal status, uric acid was a significantly independent risk factor for  
12  
13 endothelial dysfunction even after adjustment for other cardiovascular risk parameters  
14  
15 in postmenopausal women, but not in premenopausal women. To our knowledge, this is  
16  
17 the first report showing a difference in the relationship between uric acid and  
18  
19 endothelial dysfunction depending on menopausal status in women without established  
20  
21 cardiovascular disease.  
22  
23  
24  
25  
26  
27  
28  
29

30  
31 As a marker of atherosclerotic diseases, it has been demonstrated that serum uric  
32  
33 acid level is associated with cardiovascular risk factors and subclinical atherosclerosis,  
34  
35  
36  
37  
38  
39  
40  
41  
42  
43  
44  
45  
46  
47  
48  
49  
50  
51  
52  
53  
54  
55  
56  
57  
58  
59  
60

1  
2  
3  
4 such as hypertension,[11] metabolic syndrome,[12] kidney disease,[13] coronary artery  
5 calcification,[40] and carotid atherosclerosis.[41] In the present study, we confirmed  
6 that serum uric acid level was significantly associated with age, body mass index,  
7 systolic blood pressure, total cholesterol, triglycerides, glucose, and eGFR, most of  
8 which are components of metabolic syndrome and CKD. Indeed, the prevalence of  
9 hypertension, dyslipidemia, metabolic syndrome, and CKD was linearly increased in  
10 relation to increase in serum uric acid level. An association between uric acid and  
11 metabolic syndrome has been demonstrated by the fact that uric acid level is often  
12 elevated in subjects with metabolic syndrome and that the prevalence of metabolic  
13 syndrome linearly increases in relation to uric acid level.[12 41] The mechanism behind  
14 the association between increase in serum uric acid level and metabolic syndrome is  
15 thought to be hyperinsulinemia, mediated by insulin resistance and visceral adiposity,  
16 leading to an increase in uric acid absorption in renal tubules.[42] Uric acid levels are  
17 also frequently elevated in patients with kidney disease as a result of reduction in GFR  
18 and renal urate excretion.[43] In addition, several epidemiological studies have shown a  
19 link between elevated serum uric acid level and subsequent cardiovascular events.[1-10]  
20 The association between serum uric acid level and cardiovascular disease has been  
21 reported to be generally stronger in women than in men.[9 44-46] These findings  
22 suggest that uric acid level is a biochemical marker of atherosclerotic disease and a  
23 useful predictor of the development of cardiovascular diseases.

24  
25  
26  
27  
28  
29  
30  
31  
32  
33  
34  
35  
36  
37  
38  
39  
40  
41  
42  
43  
44  
45  
46  
47  
48  
49  
50  
51  
52  
53  
54  
55  
56  
57  
58  
59  
60

Despite the association between elevated uric acid level and cardiovascular conditions, uric acid has not been established as an independent causal risk factor for cardiovascular disease because of the link between uric acid and established cardiovascular risk factors. Another possible explanation for the difficulty in determining the role of uric acid in cardiovascular disease is that uric acid may function



1  
2  
3  
4 as an powerful antioxidant and as a scavenger of singlet oxygen and radicals.[47 48] In  
5  
6 patients with cardiovascular disease, an increase in uric acid level, therefore, might be  
7  
8 considered as a compensatory mechanism to counteract the oxidative stress induced in  
9  
10 these conditions. Although it remains controversial whether uric acid is a causative  
11  
12 factor or merely a marker of cardiovascular disease, some epidemiological studies have  
13  
14 demonstrated that the association between uric acid and cardiovascular disease remains  
15  
16 significant even after adjustment for concomitant risk factors, suggesting that uric acid  
17  
18 per se is an independent risk factor for cardiovascular disease.  
19  
20

21  
22 Although the precise mechanism behind the relationship between uric acid and  
23  
24 cardiovascular disease remains to be elucidated, growing evidence indicates that  
25  
26 endothelial dysfunction induced by uric acid plays an important role in the development  
27  
28 of cardiovascular disease.[43] Several lines of evidence suggest that uric acid also has  
29  
30 proinflammatory effects on endothelial cells, leading to reduction of endothelial nitric  
31  
32 oxide bioavailability and consequent endothelial dysfunction.[17 18] Yu et al.[18]  
33  
34 demonstrated that uric acid enhances the production of reactive oxygen species by  
35  
36 activation of the local renin-angiotensin system, particularly angiotensin II, in human  
37  
38 endothelial vascular cells and that probenecid, an inhibitor of urate transporter, inhibits  
39  
40 uric acid-induced oxidative stress. Thus, uric acid is thought to mediate endothelial  
41  
42 dysfunction by generating oxidative stress once absorbed into endothelial cells. In a  
43  
44 clinical setting, measurement of FMD as an index of endothelium-dependent  
45  
46 vasodilation in the brachial artery using high-resolution ultrasound has been widely  
47  
48 used as a method for assessing vascular function.[20-23] Although several investigators  
49  
50 have shown that uric acid inversely correlates with FMD and that uric acid is an  
51  
52 independent predictor of FMD, the subjects in those studies were limited to a small  
53  
54 number of subjects or highly selected subjects, such as patients with increased  
55  
56  
57  
58  
59  
60

1  
2  
3  
4  
5 cardiovascular risk,[30] hyperuricemia,[32] or nondiabetic CKD.[33] In addition, uric  
6  
7 acid has been shown to be a significantly independent risk factor for endothelial  
8  
9 dysfunction in men in an analysis of a large population,[34] but there is little  
10  
11 information on the relationship between uric acid and FMD in women. As a risk marker,  
12  
13 we demonstrated that serum uric acid level was significantly associated with FMD in  
14  
15 women. FMD was significantly impaired with increase in serum uric acid level. FMD is  
16  
17 known to be impaired as a consequence of cumulative cardiovascular risk factors.[21  
18  
19 49] Therefore, significant decrease in FMD according to serum uric acid level may  
20  
21 reflect significant associations between uric acid and other cardiovascular risk factors,  
22  
23 including hypertension, dyslipidemia, metabolic syndrome, and CKD, as a risk marker  
24  
25 for cardiovascular disease in women. These findings provide a rationale for the  
26  
27 relationships of uric acid with cardiovascular disease and mortality being generally  
28  
29 strong in women.  
0

1  
2  
3 As for the role of uric acid as a causal risk factor in endothelial function,  
3  
5 multivariate analysis performed for the entire population indicated that uric acid was not  
6  
7 an independent predictor of endothelial dysfunction after adjustment for other risk  
8  
9 factors. However, when subjects were divided into two groups according to menopausal  
10  
11 status, multivariate analyses revealed that uric acid was a significantly independent risk  
12  
13 factor for endothelial dysfunction in postmenopausal women but not in premenopausal  
14  
15 women. The incidence of cardiovascular diseases in women is lower than that in men  
16  
17 until around the age of menopause, after which it markedly increases and becomes equal  
18  
19 to that of their male counterparts, suggesting a protective effect of endogenous ovarian  
20  
21 hormones on atherosclerosis.[50] Ovarian hormones, especially estradiol, have been  
22  
23 suggested to have protective effects on endothelial function.[51 52] In addition to its  
24  
25 protective effect on endothelial function, estradiol has been shown to lower uric acid  
26  
27  
28  
29  
0  
1  
2  
3  
4  
5  
6  
7  
8  
9  
10  
11  
12  
13  
14  
15  
16  
17  
18  
19  
20  
21  
22  
23  
24  
25  
26  
27  
28  
29  
0

1  
2  
3  
4 level through mechanisms involving renal clearance, secretion and reabsorption.[53-55]  
5  
6 Therefore, endogenous estradiol may preserve endothelial function and lower serum  
7  
8 uric acid level regardless of the presence or absence of cardiovascular risk factors,  
9  
10 resulting in the weak relationship between uric acid and endothelial dysfunction in  
11  
12 premenopausal women. Our findings in the analysis of premenopausal women are  
13  
14 consistent with the results of a previous study demonstrating that uric acid was not an  
15  
16 independent risk factor of FMD in young women aged 30 to 45 years.[56] In contrast to  
17  
18 premenopausal women, uric acid remained a significantly independent risk for  
19  
20 endothelial dysfunction even after adjustment for other risk factors in postmenopausal  
21  
22 women. Although Maxwell et al.[29] reported that uric acid was not an independent  
23  
24 determinant of FMD in women, the non-independent association between FMD and uric  
25  
26 acid observed in their study may be, in part, attributed to inclusion of entire women in  
27  
28 the analysis for the relationship between FMD and uric acid without taking into account  
29  
30 menopausal status. The increased cardiovascular risk in postmenopausal women has  
31  
32 been suggested to be associated with impairment of endothelial function after  
33  
34 menopause.[57 58] There is a possibility that treatment of hyperuricemia in  
35  
36 postmenopausal women will improve endothelial function, leading to a decrease in  
37  
38 cardiovascular events.  
39  
40  
41  
42  
43

44 In conclusion, uric acid is a useful marker for endothelial function in women.  
45  
46 Significant relationships between serum uric acid level and cardiovascular risk factors,  
47  
48 including hypertension, dyslipidemia, metabolic syndrome, and CKD, may result in the  
49  
50 significant association between FMD and serum uric acid level, as a risk marker of  
51  
52 atherosclerotic diseases. Uric acid, as a causal cardiovascular risk factor, may be an  
53  
54 independent risk for endothelial dysfunction in postmenopausal women but not in  
55  
56 premenopausal women. Further studies are needed to investigate whether treatment for  
57  
58  
59  
60

1  
2  
3  
4  
5  
6  
7  
8  
9  
10  
11  
12  
13  
14  
15  
16  
17  
18  
19  
20  
21  
22  
23  
24  
25  
26  
27  
28  
29  
0  
3  
2  
3  
3  
5  
6  
3  
8  
9  
40  
41  
42  
43  
44  
45  
46  
47  
48  
49  
0  
5  
2  
3  
5  
6  
3  
8  
9  
60

hyperuricemia improves endothelial function in postmenopausal women.

For peer review only

Table 1. Clinical Characteristics of the Subjects

| Variables                             | Total<br>(n=749) |
|---------------------------------------|------------------|
| Age, y                                | 50.2±10.6        |
| Body mass index, kg/m <sup>2</sup>    | 22.0±3.4         |
| Systolic blood pressure, mm Hg        | 121.1±19.0       |
| Diastolic blood pressure, mm Hg       | 73.9±12.4        |
| Heart rate, bpm                       | 64.4±10.2        |
| Total cholesterol, mmol/L             | 5.37±0.88        |
| Triglycerides, mmol/L                 | 1.07±0.71        |
| HDL-cholesterol, mmol/L               | 1.80±0.42        |
| LDL-cholesterol, mmol/L               | 3.11±0.77        |
| Glucose, mmol/L                       | 5.32±1.47        |
| Uric acid, mg/dL                      | 4.44±1.09        |
| eGFR, mL/min/1.73 m <sup>2</sup>      | 77.1±13.3        |
| Framingham risk score, %              | 3.94±3.62        |
| Hypertension, n (%)                   | 112 (15.0)       |
| Dyslipidemia, n (%)                   | 262 (35.0)       |
| Diabetes mellitus, n (%)              | 34 (4.5)         |
| Smoking, n (%)                        | 59 (7.9)         |
| Metabolic syndrome, n (%)             | 65 (8.7)         |
| Chronic kidney disease, n (%)         | 56 (8.4)         |
| Menopause, n (%)                      | 381 (50.9)       |
| Flow-mediated vasodilation, %         | 6.59±3.60        |
| Baseline brachial artery diameter, mm | 3.40±0.47        |

HDL indicates high-density lipoprotein; LDL, low-density lipoprotein; eGFR, estimated glomerular filtration rate.

Table 2. Clinical Characteristics according to Serum Uric Acid Levels

| Variables                                | Uric acid categories, mg/dL |                        |                        |                | P value |
|------------------------------------------|-----------------------------|------------------------|------------------------|----------------|---------|
|                                          | <4.0<br>(n=245)             | 4.0 to <5.0<br>(n=302) | 5.0 to <6.0<br>(n=144) | 6.0≤<br>(n=58) |         |
| Uric acid, mg/dL                         | 3.38±0.54                   | 4.42±0.28              | 5.33±0.26              | 6.90±0.90      |         |
| Age, y                                   | 48.3±10.9                   | 49.4±10.1              | 53.5±9.9               | 54.7±10.0      | <0.001  |
| Body mass index, kg/m <sup>2</sup>       | 20.8±2.8                    | 22.0±3.4               | 23.0±3.3               | 24.2±3.9       | <0.001  |
| Systolic blood pressure, mm Hg           | 117.2±17.6                  | 120.4±18.3             | 125.9±20.4             | 129.2±20.5     | <0.001  |
| Diastolic blood pressure, mm Hg          | 71.5±11.4                   | 73.6±12.1              | 77.4±13.4              | 77.0±12.5      | <0.001  |
| Heart rate, bpm                          | 64.6±9.6                    | 63.5±0.6               | 65.5±12.4              | 65.8±11.1      | 0.14    |
| Total cholesterol, mmol/L                | 5.20±0.82                   | 5.33±0.86              | 5.60±0.91              | 5.67±0.88      | <0.001  |
| Triglycerides, mmol/L                    | 0.89±0.51                   | 0.97±0.50              | 1.32±0.81              | 1.69±1.32      | <0.001  |
| HDL-cholesterol, mmol/L                  | 1.83±0.38                   | 1.83±0.41              | 1.69±0.45              | 1.69±0.54      | 0.001   |
| LDL-cholesterol, mmol/L                  | 3.00±0.70                   | 3.10±0.77              | 3.31±0.80              | 3.19±0.96      | 0.006   |
| Glucose, mmol/L                          | 5.09±0.84                   | 5.28±1.38              | 5.52±2.00              | 6.03±2.09      | <0.001  |
| eGFR, mL/min/1.73 m <sup>2</sup>         | 80.9±13.7                   | 76.8±12.1              | 74.4±13.0              | 67.7±13.8      | <0.001  |
| Baseline brachial artery diameter,<br>mm | 3.35±0.46                   | 3.40±0.48              | 3.43±0.46              | 3.61±0.51      | 0.002   |
| Framingham risk score, %                 | 3.27±3.44                   | 3.49±2.98              | 5.08±3.65              | 6.33±5.42      | <0.001  |
| Hypertension, n (%)                      | 25 (10.2)                   | 34 (11.3)              | 34 (23.6)              | 19 (32.8)      | <0.001  |
| Dyslipidemia, n (%)                      | 59 (24.1)                   | 90 (29.8)              | 72 (50.0)              | 41 (70.7)      | <0.001  |
| Diabetes mellitus, n (%)                 | 9 (3.7)                     | 8 (2.7)                | 9 (6.3)                | 8 (13.8)       | 0.008   |
| Smoking, n (%)                           | 12 (4.9)                    | 23 (7.6)               | 15 (10.4)              | 9 (15.5)       | 0.04    |
| Metabolic syndrome, n (%)                | 12 (4.9)                    | 18 (6.0)               | 19 (13.2)              | 16 (28.1)      | <0.001  |
| Chronic kidney disease, n (%)            | 10 (4.6)                    | 22 (7.9)               | 14 (10.9)              | 10 (24.4)      | 0.001   |
| Menopause, n (%)                         | 103 (42.0)                  | 146 (48.3)             | 91 (63.2)              | 41 (70.7)      | <0.001  |
| Endothelial dysfunction, n (%)           | 75 (30.6)                   | 87 (28.8)              | 50 (34.7)              | 32 (55.2)      | 0.002   |

HDL indicates high-density lipoprotein; LDL, low-density lipoprotein; eGFR, estimated glomerular filtration rate; P values for comparisons across the uric acid categories were performed with ANOVA for continuous variables and  $\chi^2$  test for categorical variables.

Table 3. Multivariate Analysis of the Relation Between Flow-mediated Vasodilation and Variables

| Model | Variables         | Odds ratio (95%CI)  | P value |
|-------|-------------------|---------------------|---------|
| 1     | Uric acid (mg/dL) | 11.2 (3.07 to 41.8) | <0.001  |
| 2     | 1+age             | 5.23 (1.36 to 20.4) | 0.02    |
| 3     | 2+other variables | 2.07 (0.47 to 9.23) | 0.34    |

Other variables include body mass index, systolic blood pressure, total cholesterol, glucose, smoking status, eGFR, and brachial artery diameter.

Table 4. Multivariate Analysis of the Relation Between Endothelial Dysfunction and Variables

| Model | Covariates        | Post-menopausal     |         | Pre-menopausal      |         |
|-------|-------------------|---------------------|---------|---------------------|---------|
|       |                   | Odds ratio (95% CI) | P value | Odds ratio (95% CI) | P value |
| 1     | Uric acid (mg/dL) | 7.60 (1.55 to 39.2) | 0.01    | 2.98 (0.39 to 21.7) | 0.28    |
| 2     | 1+age             | 7.33 (1.48 to 38.1) | 0.02    | 2.01 (0.24 to 16.5) | 0.50    |
| 3     | 2+other variables | 8.04 (1.68 to 40.9) | 0.01    | 0.13 (0.01 to 1.40) | 0.09    |

Other variables include body mass index, systolic blood pressure, total cholesterol, glucose, smoking status, eGFR, and brachial artery diameter.



### Author Contributions

Tatsuya Maruhashi and Yukihiro Higashi, drafting the article and conception of this study; Junko Soga, Noritaka Fujimura, Naomi Idei, Shinsuke Mikami, Yumiko Iwamoto, Masato Kajikawa, Takeshi Matsumoto, Takayuki Hidaka, Chikara Goto, Kensuke Noma, Ayumu Nakashima, Bonpei Takase, and Hirofumi Tomiyama, performing the ultrasonography; Kazuaki Chayama, Yasuki Kihara, Akira Yamashina, revising the article critically for important intellectual content.

### Acknowledgments

We thank Megumi Wakisaka, Miki Kumiji, Kiichiro Kawano and Satoko Michiyama for their excellent secretarial assistance.

### Competing interests

None.

### Funding

This study was supported in part by a Grant-in-Aid for Scientific Research from the Ministry of Education, Science and Culture of Japan (1859081500 and 21590898) and a Grant in Aid of Japanese Arteriosclerosis Prevention Fund.

## References

1. Reunanen A, Takkunen H, Knekt P, et al. Hyperuricemia as a risk factor for cardiovascular mortality. *Acta Med Scand Suppl* 1982;**668**:49-59
2. Levine W, Dyer AR, Shekelle RB, et al. Serum uric acid and 11.5-year mortality of middle-aged women: findings of the Chicago Heart Association Detection Project in Industry. *J Clin Epidemiol* 1989;**42**(3):257-67
3. Wannamethee SG, Shaper AG, Whincup PH. Serum urate and the risk of major coronary heart disease events. *Heart* 1997;**78**(2):147-53
4. Lehto S, Niskanen L, Ronnema T, et al. Serum uric acid is a strong predictor of stroke in patients with non-insulin-dependent diabetes mellitus. *Stroke* 1998;**29**(3):635-9
5. Alderman MH, Cohen H, Madhavan S, et al. Serum uric acid and cardiovascular events in successfully treated hypertensive patients. *Hypertension* 1999;**34**(1):144-50
6. Culeton BF, Larson MG, Kannel WB, et al. Serum uric acid and risk for cardiovascular disease and death: the Framingham Heart Study. *Ann Intern Med* 1999;**131**(1):7-13
7. Moriarty JT, Folsom AR, Iribarren C, et al. Serum uric acid and risk of coronary heart disease: Atherosclerosis Risk in Communities (ARIC) Study. *Ann Epidemiol* 2000;**10**(3):136-43
8. Verdecchia P, Schillaci G, Reboldi G, et al. Relation between serum uric acid and risk of cardiovascular disease in essential hypertension. The PIUMA study. *Hypertension* 2000;**36**(6):1072-8
9. Fang J, Alderman MH. Serum uric acid and cardiovascular mortality the NHANES I epidemiologic follow-up study, 1971-1992. *National Health and Nutrition*

- 1  
2  
3  
4  
5 Examination Survey. *Jama* 2000;**283**(18):2404-10
- 6  
7 10. Ioachimescu AG, Brennan DM, Hoar BM, et al. Serum uric acid is an independent  
8  
9 predictor of all-cause mortality in patients at high risk of cardiovascular disease:  
10  
11 a preventive cardiology information system (PreCIS) database cohort study.  
12  
13 *Arthritis Rheum* 2008;**58**(2):623-30
- 14  
15 11. Cannon PJ, Stason WB, Demartini FE, et al. Hyperuricemia in primary and renal  
16  
17 hypertension. *N Engl J Med* 1966;**275**(9):457-64
- 18  
19  
20 12. Ford ES, Li C, Cook S, et al. Serum concentrations of uric acid and the metabolic  
21  
22 syndrome among US children and adolescents. *Circulation*  
23  
24 2007;**115**(19):2526-32
- 25  
26  
27 13. Siu YP, Leung KT, Tong MK, et al. Use of allopurinol in slowing the progression of  
28  
29 renal disease through its ability to lower serum uric acid level. *Am J Kidney Dis*  
30  
31 2006;**47**(1):51-9
- 32  
33  
34 14. Feig DI, Kang DH, Johnson RJ. Uric acid and cardiovascular risk. *N Engl J Med*  
35  
36 2008;**359**(17):1811-21
- 37  
38  
39 15. Gagliardi AC, Miname MH, Santos RD. Uric acid: A marker of increased  
40  
41 cardiovascular risk. *Atherosclerosis* 2009;**202**(1):11-7
- 42  
43  
44 16. Khosla UM, Zharikov S, Finch JL, et al. Hyperuricemia induces endothelial  
45  
46 dysfunction. *Kidney Int* 2005;**67**(5):1739-42
- 47  
48  
49 17. Kang DH, Park SK, Lee IK, et al. Uric acid-induced C-reactive protein expression:  
50  
51 implication on cell proliferation and nitric oxide production of human vascular  
52  
53 cells. *J Am Soc Nephrol* 2005;**16**(12):3553-62
- 54  
55  
56 18. Yu MA, Sanchez-Lozada LG, Johnson RJ, et al. Oxidative stress with an activation  
57  
58 of the renin-angiotensin system in human vascular endothelial cells as a novel  
59  
60 mechanism of uric acid-induced endothelial dysfunction. *J Hypertens*

- 2010;**28**(6):1234-42
19. Ross R. Atherosclerosis--an inflammatory disease. *N Engl J Med* 1999;**340**(2):115-26
20. Celermajer DS, Sorensen KE, Gooch VM, et al. Non-invasive detection of endothelial dysfunction in children and adults at risk of atherosclerosis. *Lancet* 1992;**340**(8828):1111-5
21. Benjamin EJ, Larson MG, Keyes MJ, et al. Clinical correlates and heritability of flow-mediated dilation in the community: the Framingham Heart Study. *Circulation* 2004;**109**(5):613-9
22. Idei N, Nishioka K, Soga J, et al. Vascular function and circulating progenitor cells in thromboangitis obliterans (Buerger's disease) and atherosclerosis obliterans. *Hypertension* 2011;**57**(1):70-8
23. Soga J, Noma K, Hata T, et al. Rho-associated kinase activity, endothelial function, and cardiovascular risk factors. *Arterioscler Thromb Vasc Biol* 2011;**31**(10):2353-9
24. Fujimura N, Noma K, Hata T, et al. Mineralocorticoid receptor blocker eplerenone improves endothelial function and inhibits Rho-associated kinase activity in patients with hypertension. *Clin Pharmacol Ther* 2012;**91**(2):289-97
25. Modena MG, Bonetti L, Coppi F, et al. Prognostic role of reversible endothelial dysfunction in hypertensive postmenopausal women. *J Am Coll Cardiol* 2002;**40**(3):505-10
26. Gokce N, Keaney JF, Jr., Hunter LM, et al. Risk stratification for postoperative cardiovascular events via noninvasive assessment of endothelial function: a prospective study. *Circulation* 2002;**105**(13):1567-72
27. Brevetti G, Silvestro A, Schiano V, et al. Endothelial dysfunction and cardiovascular

- 1  
2  
3  
4 risk prediction in peripheral arterial disease: additive value of flow-mediated  
5  
6 dilation to ankle-brachial pressure index. *Circulation* 2003;**108**(17):2093-8  
7  
8
- 9 28. Lerman A, Zeiher AM. Endothelial function: cardiac events. *Circulation*  
10  
11 2005;**111**(3):363-8  
12
- 13 29. Maxwell AJ, Bruinsma KA. Uric acid is closely linked to vascular nitric oxide  
14  
15 activity. Evidence for mechanism of association with cardiovascular disease. *J*  
16  
17 *Am Coll Cardiol* 2001;**38**(7):1850-8  
18
- 19 30. Mercurio G, Vitale C, Cerquetani E, et al. Effect of hyperuricemia upon endothelial  
20  
21 function in patients at increased cardiovascular risk. *Am J Cardiol*  
22  
23 2004;**94**(7):932-5  
24
- 25 31. Kato M, Hisatome I, Tomikura Y, et al. Status of endothelial dependent vasodilation  
26  
27 in patients with hyperuricemia. *Am J Cardiol* 2005;**96**(11):1576-8  
28
- 29 32. Ho WJ, Tsai WP, Yu KH, et al. Association between endothelial dysfunction and  
30  
31 hyperuricaemia. *Rheumatology (Oxford)* 2010;**49**(10):1929-34  
32
- 33 33. Kanbay M, Yilmaz MI, Sonmez A, et al. Serum uric acid level and endothelial  
34  
35 dysfunction in patients with nondiabetic chronic kidney disease. *Am J Nephrol*  
36  
37 2011;**33**(4):298-304  
38
- 39 34. Tomiyama H, Higashi Y, Takase B, et al. Relationships among hyperuricemia,  
40  
41 metabolic syndrome, and endothelial function. *Am J Hypertens*  
42  
43 2011;**24**(7):770-4  
44
- 45 35. American Diabetes Association: clinical practice recommendations 1999. *Diabetes*  
46  
47 *Care* 1999;**22 Suppl 1**:S1-114  
48
- 49 36. Executive Summary of The Third Report of The National Cholesterol Education  
50  
51 Program (NCEP) Expert Panel on Detection, Evaluation, And Treatment of High  
52  
53 Blood Cholesterol In Adults (Adult Treatment Panel III). *Jama*  
54  
55  
56  
57  
58  
59  
60

- 2001;**285**(19):2486-97
37. Wilson PW, Castelli WP, Kannel WB. Coronary risk prediction in adults (the Framingham Heart Study). *Am J Cardiol* 1987;**59**(14):91G-94G
38. Matsuo S, Imai E, Horio M, et al. Revised equations for estimated GFR from serum creatinine in Japan. *Am J Kidney Dis* 2009;**53**(6):982-92
39. K/DOQI clinical practice guidelines for chronic kidney disease: evaluation, classification, and stratification. *Am J Kidney Dis* 2002;**39**(2 Suppl 1):S1-266
40. Coutinho Tde A, Turner ST, Peyser PA, et al. Associations of serum uric acid with markers of inflammation, metabolic syndrome, and subclinical coronary atherosclerosis. *Am J Hypertens* 2007;**20**(1):83-9
41. Ishizaka N, Ishizaka Y, Toda E, et al. Association between serum uric acid, metabolic syndrome, and carotid atherosclerosis in Japanese individuals. *Arterioscler Thromb Vasc Biol* 2005;**25**(5):1038-44
42. Quinones Galvan A, Natali A, Baldi S, et al. Effect of insulin on uric acid excretion in humans. *Am J Physiol* 1995;**268**(1 Pt 1):E1-5
43. Johnson RJ, Kang DH, Feig D, et al. Is there a pathogenetic role for uric acid in hypertension and cardiovascular and renal disease? *Hypertension* 2003;**41**(6):1183-90
44. Bengtsson C, Lapidus L, Stendahl C, et al. Hyperuricaemia and risk of cardiovascular disease and overall death. A 12-year follow-up of participants in the population study of women in Gothenburg, Sweden. *Acta Med Scand* 1988;**224**(6):549-55
45. Freedman DS, Williamson DF, Gunter EW, et al. Relation of serum uric acid to mortality and ischemic heart disease. The NHANES I Epidemiologic Follow-up Study. *Am J Epidemiol* 1995;**141**(7):637-44

- 1  
2  
3  
4  
5  
6  
7  
8  
9  
10  
11  
12  
13  
14  
15  
16  
17  
18  
19  
20  
21  
22  
23  
24  
25  
26  
27  
28  
29  
0  
3  
2  
3  
3  
5  
6  
7  
8  
9  
40  
41  
42  
43  
44  
45  
46  
47  
48  
49  
0  
5  
2  
3  
5  
6  
7  
8  
9  
60
46. Tuttle KR, Short RA, Johnson RJ. Sex differences in uric acid and risk factors for coronary artery disease. *Am J Cardiol* 2001;**87**(12):1411-4
  47. Ames BN, Cathcart R, Schwiers E, et al. Uric acid provides an antioxidant defense in humans against oxidant- and radical-caused aging and cancer: a hypothesis. *Proc Natl Acad Sci U S A* 1981;**78**(11):6858-62
  48. Nieto FJ, Iribarren C, Gross MD, et al. Uric acid and serum antioxidant capacity: a reaction to atherosclerosis? *Atherosclerosis* 2000;**148**(1):131-9
  49. Celermajer DS, Sorensen KE, Bull C, et al. Endothelium-dependent dilation in the systemic arteries of asymptomatic subjects relates to coronary risk factors and their interaction. *J Am Coll Cardiol* 1994;**24**(6):1468-74
  50. Lerner DJ, Kannel WB. Patterns of coronary heart disease morbidity and mortality in the sexes: a 26-year follow-up of the Framingham population. *Am Heart J* 1986;**111**(2):383-90
  51. Lieberman EH, Gerhard MD, Uehata A, et al. Estrogen improves endothelium-dependent, flow-mediated vasodilation in postmenopausal women. *Ann Intern Med* 1994;**121**(12):936-41
  52. Hashimoto M, Akishita M, Eto M, et al. Modulation of endothelium-dependent flow-mediated dilatation of the brachial artery by sex and menstrual cycle. *Circulation* 1995;**92**(12):3431-5
  53. Nicholls A, Snaith ML, Scott JT. Effect of oestrogen therapy on plasma and urinary levels of uric acid. *Br Med J* 1973;**1**(5851):449-51
  54. Hak AE, Choi HK. Menopause, postmenopausal hormone use and serum uric acid levels in US women--the Third National Health and Nutrition Examination Survey. *Arthritis Res Ther* 2008;**10**(5):R116
  55. Mumford SL, Dasharathy SS, Pollack AZ, et al. Serum uric acid in relation to

1  
2  
3  
4  
5  
6  
7  
8  
9  
10  
11  
12  
13  
14  
15  
16  
17  
18  
19  
20  
21  
22  
23  
24  
25  
26  
27  
28  
29  
30  
31  
32  
33  
34  
35  
36  
37  
38  
39  
40  
41  
42  
43  
44  
45  
46  
47  
48  
49  
50  
51  
52  
53  
54  
55  
56  
57  
58  
59  
60

endogenous reproductive hormones during the menstrual cycle: findings from the BioCycle study. *Hum Reprod* 2013;**28**(7):1853-62

56. Oikonen M, Wendelin-Saarenhovi M, Lyytikainen LP, et al. Associations between serum uric acid and markers of subclinical atherosclerosis in young adults. The cardiovascular risk in Young Finns study. *Atherosclerosis* 2012;**223**(2):497-503

57. Celermajer DS, Sorensen KE, Spiegelhalter DJ, et al. Aging is associated with endothelial dysfunction in healthy men years before the age-related decline in women. *J Am Coll Cardiol* 1994;**24**(2):471-6

58. Taddei S, Viridis A, Ghiadoni L, et al. Menopause is associated with endothelial dysfunction in women. *Hypertension* 1996;**28**(4):576-82



**Figure legends**

Figure 1. Bar graphs show flow-mediated vasodilation in women categorized according to serum uric acid level.

For peer review only

1  
2  
3  
4  
5  
6  
7  
8  
9  
10  
11  
12  
13  
14  
15  
16  
17  
18  
19  
20  
21  
22  
23  
24  
25  
26  
27  
28  
29  
0  
3  
2  
3  
3  
5  
6  
3  
8  
9  
40  
41  
42  
43  
44  
45  
46  
47  
48  
49  
0  
5  
2  
3  
5  
6  
3  
8

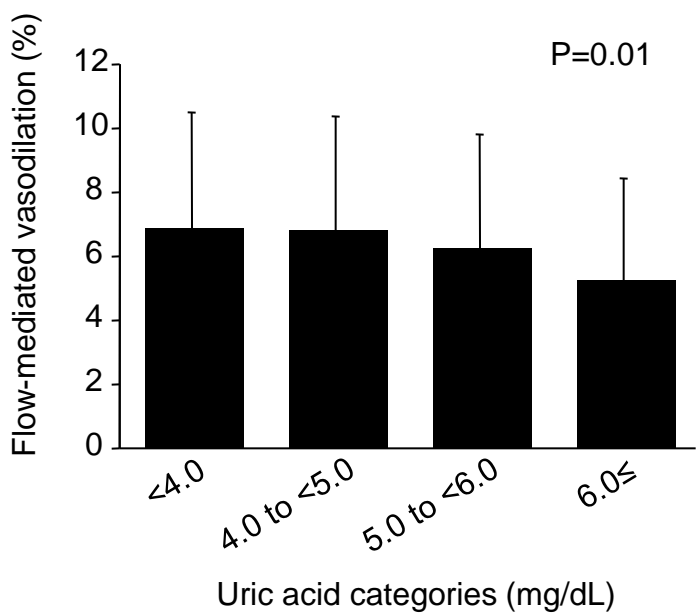

## Supplemental data

**Hyperuricemia is Independently Associated with Endothelial Dysfunction in Postmenopausal Women but not in Premenopausal Women**

Brief title: Hyperuricemia and endothelial function in women

Tatsuya Maruhashi, MD;<sup>1</sup> Ayumu Nakashima, MD, PhD;<sup>2</sup> Junko Soga MD, PhD;<sup>1</sup> Noritaka Fujimura, MD, PhD;<sup>1</sup> Naomi Idei, MD, PhD;<sup>1</sup> Shinsuke Mikami, MD;<sup>1</sup> Yumiko Iwamoto, MD;<sup>1</sup> Masato Kajikawa, MD;<sup>1</sup> Takeshi Matsumoto, MD;<sup>1</sup> Takayuki Hidaka, MD, PhD;<sup>1</sup> Yasuki Kihara, MD, PhD;<sup>1</sup> Kazuaki Chayama, MD, PhD;<sup>3</sup> Chikara Goto, PhD;<sup>4</sup> Kensuke Noma, MD, PhD;<sup>5</sup> Hirofumi Tomiyama, MD, PhD, FAHA;<sup>6</sup> Bonpei Takase, MD, PhD, FAHA;<sup>7</sup> Akira Yamashina, MD, PhD;<sup>6</sup> Yukihiro Higashi, MD, PhD, FAHA<sup>2,5</sup>

<sup>1</sup>Department of Cardiovascular Medicine, Hiroshima University Graduate School of Biomedical Sciences, Hiroshima, Japan

<sup>2</sup>Division of Regeneration and Medicine, Hiroshima University Hospital, Hiroshima, Japan

<sup>3</sup>Department of Medicine and Molecular Science, Hiroshima University Graduate School of Biomedical Sciences, Hiroshima, Japan

<sup>4</sup>Hiroshima International University, Hiroshima, Japan

<sup>5</sup>Department of Cardiovascular Regeneration and Medicine, Research Institute for Radiation Biology and Medicine, Hiroshima University, Hiroshima, Japan

<sup>6</sup>The Second Department of Internal Medicine, Tokyo Medical University, Tokyo, Japan

<sup>7</sup>Division of Biomedical Engineering, National Defense Medical College Research Institute, Tokorozawa, Japan

Address for corresponding: Yukihiro Higashi, MD, PhD, FAHA

Professor and Chair

Department of Cardiovascular Regeneration and Medicine,

Research Institute for Radiation Biology and Medicine (RIRBM),

Hiroshima University

1-2-3 Kasumi, Minami-ku, Hiroshima 734-8553, Japan

Fax: +81-82-257-5831, Phone: +81-82-257-5831

E-mail: [yhigashi@hiroshima-u.ac.jp](mailto:yhigashi@hiroshima-u.ac.jp)

Table I. Clinical Characteristics of Premenopause and Menopause Women

| Variables                                | Premenopause<br>(n=368) | Postmenopause<br>(n=381) | P value |
|------------------------------------------|-------------------------|--------------------------|---------|
| Age, y                                   | 41.5±6.1                | 58.6±6.3                 | <0.001  |
| Body mass index, kg/m <sup>2</sup>       | 21.4±3.5                | 22.5±3.2                 | <0.001  |
| Systolic blood pressure, mm Hg           | 113.6±14.4              | 128.3±20.2               | <0.001  |
| Diastolic blood pressure, mm Hg          | 70.6±11.3               | 77.9±12.6                | <0.001  |
| Heart rate, bpm                          | 63.5±9.6                | 65.2±10.6                | 0.02    |
| Total cholesterol, mmol/L                | 5.05±0.80               | 5.67±0.84                | <0.001  |
| Triglycerides, mmol/L                    | 0.87±0.59               | 1.25±0.76                | <0.001  |
| HDL-cholesterol, mmol/L                  | 1.82±0.40               | 1.77±0.45                | 0.11    |
| LDL-cholesterol, mmol/L                  | 2.85±0.68               | 3.36±0.78                | <0.001  |
| Glucose, mmol/L                          | 5.09±0.82               | 5.55±1.87                | <0.001  |
| Uric acid, mg/dL                         | 4.24±1.03               | 4.64±1.11                | <0.001  |
| eGFR, mL/min/1.73 m <sup>2</sup>         | 79.2±12.8               | 74.9±13.5                | <0.001  |
| Framingham risk score, %                 | 1.67±1.36               | 6.13±3.77                | <0.001  |
| Hypertension, n (%)                      | 12 (3.3)                | 100 (26.3)               | <0.001  |
| Dyslipidemia, n (%)                      | 65 (17.7)               | 197 (51.7)               | <0.001  |
| Diabetes mellitus, n (%)                 | 8 (2.2)                 | 26 (6.8)                 | 0.002   |
| Smoking, n (%)                           | 34 (9.2)                | 25 (6.6)                 | 0.18    |
| Metabolic syndrome, n (%)                | 17 (4.6)                | 48 (12.6)                | <0.001  |
| Chronic kidney disease, n (%)            | 18 (5.2)                | 38 (11.8)                | 0.002   |
| Endothelial dysfunction, n (%)           | 125 (34.0)              | 253 (66.4)               | <0.001  |
| Flow-mediated vasodilation, %            | 7.77±3.71               | 5.51±3.14                | <0.001  |
| Baseline brachial artery diameter,<br>mm | 3.28±0.41               | 3.52±0.49                | <0.001  |

HDL indicates high-density lipoprotein; LDL, low-density lipoprotein; eGFR, estimated glomerular filtration rate.

## STROBE Statement—checklist of items that should be included in reports of observational studies

|                              | Item No | Recommendation                                                                                                                                                                                                                                                                                                                                                                                                                                                                                                                                                                                                                                                                                   |
|------------------------------|---------|--------------------------------------------------------------------------------------------------------------------------------------------------------------------------------------------------------------------------------------------------------------------------------------------------------------------------------------------------------------------------------------------------------------------------------------------------------------------------------------------------------------------------------------------------------------------------------------------------------------------------------------------------------------------------------------------------|
| <b>Title and abstract</b>    | ①       | (a) Indicate the study's design with a commonly used term in the title or the abstract<br>(b) Provide in the abstract an informative and balanced summary of what was done and what was found                                                                                                                                                                                                                                                                                                                                                                                                                                                                                                    |
| <b>Introduction</b>          |         |                                                                                                                                                                                                                                                                                                                                                                                                                                                                                                                                                                                                                                                                                                  |
| Background/rationale         | ②       | Explain the scientific background and rationale for the investigation being reported                                                                                                                                                                                                                                                                                                                                                                                                                                                                                                                                                                                                             |
| Objectives                   | ③       | State specific objectives, including any prespecified hypotheses                                                                                                                                                                                                                                                                                                                                                                                                                                                                                                                                                                                                                                 |
| <b>Methods</b>               |         |                                                                                                                                                                                                                                                                                                                                                                                                                                                                                                                                                                                                                                                                                                  |
| Study design                 | ④       | Present key elements of study design early in the paper                                                                                                                                                                                                                                                                                                                                                                                                                                                                                                                                                                                                                                          |
| Setting                      | ⑤       | Describe the setting, locations, and relevant dates, including periods of recruitment, exposure, follow-up, and data collection                                                                                                                                                                                                                                                                                                                                                                                                                                                                                                                                                                  |
| Participants                 | ⑥       | (a) <i>Cohort study</i> —Give the eligibility criteria, and the sources and methods of selection of participants. Describe methods of follow-up<br><i>Case-control study</i> —Give the eligibility criteria, and the sources and methods of case ascertainment and control selection. Give the rationale for the choice of cases and controls<br><i>Cross-sectional study</i> —Give the eligibility criteria, and the sources and methods of selection of participants<br>(b) <i>Cohort study</i> —For matched studies, give matching criteria and number of exposed and unexposed<br><i>Case-control study</i> —For matched studies, give matching criteria and the number of controls per case |
| Variables                    | ⑦       | Clearly define all outcomes, exposures, predictors, potential confounders, and effect modifiers. Give diagnostic criteria, if applicable                                                                                                                                                                                                                                                                                                                                                                                                                                                                                                                                                         |
| Data sources/<br>measurement | ⑧*      | For each variable of interest, give sources of data and details of methods of assessment (measurement). Describe comparability of assessment methods if there is more than one group                                                                                                                                                                                                                                                                                                                                                                                                                                                                                                             |
| Bias                         | ⑨       | Describe any efforts to address potential sources of bias                                                                                                                                                                                                                                                                                                                                                                                                                                                                                                                                                                                                                                        |
| Study size                   | ⑩       | Explain how the study size was arrived at                                                                                                                                                                                                                                                                                                                                                                                                                                                                                                                                                                                                                                                        |
| Quantitative variables       | ⑪       | Explain how quantitative variables were handled in the analyses. If applicable, describe which groupings were chosen and why                                                                                                                                                                                                                                                                                                                                                                                                                                                                                                                                                                     |
| Statistical methods          | ⑫       | (a) Describe all statistical methods, including those used to control for confounding<br>(b) Describe any methods used to examine subgroups and interactions<br>(c) Explain how missing data were addressed<br>(d) <i>Cohort study</i> —If applicable, explain how loss to follow-up was addressed<br><i>Case-control study</i> —If applicable, explain how matching of cases and controls was addressed<br><i>Cross-sectional study</i> —If applicable, describe analytical methods taking account of sampling strategy<br>(e) Describe any sensitivity analyses                                                                                                                                |

Continued on next page

**Results**

|                  |       |                                                                                                                                                                                                                                                                                                                                                                                                               |
|------------------|-------|---------------------------------------------------------------------------------------------------------------------------------------------------------------------------------------------------------------------------------------------------------------------------------------------------------------------------------------------------------------------------------------------------------------|
| Participants     | (13)* | (a) Report numbers of individuals at each stage of study—eg numbers potentially eligible, examined for eligibility, confirmed eligible, included in the study, completing follow-up, and analysed<br>(b) Give reasons for non-participation at each stage<br>(c) Consider use of a flow diagram                                                                                                               |
| Descriptive data | (14)* | (a) Give characteristics of study participants (eg demographic, clinical, social) and information on exposures and potential confounders<br>(b) Indicate number of participants with missing data for each variable of interest<br>(c) <i>Cohort study</i> —Summarise follow-up time (eg, average and total amount)                                                                                           |
| Outcome data     | (15)* | <i>Cohort study</i> —Report numbers of outcome events or summary measures over time<br><i>Case-control study</i> —Report numbers in each exposure category, or summary measures of exposure<br><i>Cross-sectional study</i> —Report numbers of outcome events or summary measures                                                                                                                             |
| Main results     | (16)  | (a) Give unadjusted estimates and, if applicable, confounder-adjusted estimates and their precision (eg, 95% confidence interval). Make clear which confounders were adjusted for and why they were included<br>(b) Report category boundaries when continuous variables were categorized<br>(c) If relevant, consider translating estimates of relative risk into absolute risk for a meaningful time period |
| Other analyses   | (17)  | Report other analyses done—eg analyses of subgroups and interactions, and sensitivity analyses                                                                                                                                                                                                                                                                                                                |

**Discussion**

|                  |      |                                                                                                                                                                            |
|------------------|------|----------------------------------------------------------------------------------------------------------------------------------------------------------------------------|
| Key results      | (18) | Summarise key results with reference to study objectives                                                                                                                   |
| Limitations      | (19) | Discuss limitations of the study, taking into account sources of potential bias or imprecision. Discuss both direction and magnitude of any potential bias                 |
| Interpretation   | (20) | Give a cautious overall interpretation of results considering objectives, limitations, multiplicity of analyses, results from similar studies, and other relevant evidence |
| Generalisability | (21) | Discuss the generalisability (external validity) of the study results                                                                                                      |

**Other information**

|         |      |                                                                                                                                                               |
|---------|------|---------------------------------------------------------------------------------------------------------------------------------------------------------------|
| Funding | (22) | Give the source of funding and the role of the funders for the present study and, if applicable, for the original study on which the present article is based |
|---------|------|---------------------------------------------------------------------------------------------------------------------------------------------------------------|

\*Give information separately for cases and controls in case-control studies and, if applicable, for exposed and unexposed groups in cohort and cross-sectional studies.

**Note:** An Explanation and Elaboration article discusses each checklist item and gives methodological background and published examples of transparent reporting. The STROBE checklist is best used in conjunction with this article (freely available on the Web sites of PLoS Medicine at <http://www.plosmedicine.org/>, Annals of Internal Medicine at <http://www.annals.org/>, and Epidemiology at <http://www.epidem.com/>). Information on the STROBE Initiative is available at [www.strobe-statement.org](http://www.strobe-statement.org).

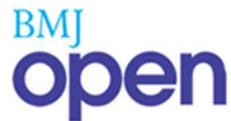

**Hyperuricemia is Independently Associated with Endothelial Dysfunction in Postmenopausal Women but not in Premenopausal Women**

|                                 |                                                                                                                                                                                                                                                                                                                                                                                                                                                                                                                                                                                                                                                                                                                                                                                                                                                                                                                                                                                                                                                                                                                                                                                                                                                                                                                                                                                                                                                                                                                                                                                                                                                                                                                                                                                                                                                                                                                                                                                                                                                                                                                                                                    |
|---------------------------------|--------------------------------------------------------------------------------------------------------------------------------------------------------------------------------------------------------------------------------------------------------------------------------------------------------------------------------------------------------------------------------------------------------------------------------------------------------------------------------------------------------------------------------------------------------------------------------------------------------------------------------------------------------------------------------------------------------------------------------------------------------------------------------------------------------------------------------------------------------------------------------------------------------------------------------------------------------------------------------------------------------------------------------------------------------------------------------------------------------------------------------------------------------------------------------------------------------------------------------------------------------------------------------------------------------------------------------------------------------------------------------------------------------------------------------------------------------------------------------------------------------------------------------------------------------------------------------------------------------------------------------------------------------------------------------------------------------------------------------------------------------------------------------------------------------------------------------------------------------------------------------------------------------------------------------------------------------------------------------------------------------------------------------------------------------------------------------------------------------------------------------------------------------------------|
| Journal:                        | <i>BMJ Open</i>                                                                                                                                                                                                                                                                                                                                                                                                                                                                                                                                                                                                                                                                                                                                                                                                                                                                                                                                                                                                                                                                                                                                                                                                                                                                                                                                                                                                                                                                                                                                                                                                                                                                                                                                                                                                                                                                                                                                                                                                                                                                                                                                                    |
| Manuscript ID:                  | bmjopen-2013-003659.R1                                                                                                                                                                                                                                                                                                                                                                                                                                                                                                                                                                                                                                                                                                                                                                                                                                                                                                                                                                                                                                                                                                                                                                                                                                                                                                                                                                                                                                                                                                                                                                                                                                                                                                                                                                                                                                                                                                                                                                                                                                                                                                                                             |
| Article Type:                   | Research                                                                                                                                                                                                                                                                                                                                                                                                                                                                                                                                                                                                                                                                                                                                                                                                                                                                                                                                                                                                                                                                                                                                                                                                                                                                                                                                                                                                                                                                                                                                                                                                                                                                                                                                                                                                                                                                                                                                                                                                                                                                                                                                                           |
| Date Submitted by the Author:   | 02-Oct-2013                                                                                                                                                                                                                                                                                                                                                                                                                                                                                                                                                                                                                                                                                                                                                                                                                                                                                                                                                                                                                                                                                                                                                                                                                                                                                                                                                                                                                                                                                                                                                                                                                                                                                                                                                                                                                                                                                                                                                                                                                                                                                                                                                        |
| Complete List of Authors:       | <p>Maruhashi, Tatsuya; Hiroshima University Graduate School of Biomedical Sciences, Department of Cardiovascular Medicine<br/> Nakashima, Ayumu; Hiroshima University Hospital, Division of Regeneration and Medicine<br/> Soga, Junko; Hiroshima University Graduate School of Biomedical Sciences, Department of Cardiovascular Medicine<br/> Fujimura, Noritaka; Hiroshima University Graduate School of Biomedical Sciences, Department of Cardiovascular Medicine<br/> Idei, Naomi; Hiroshima University Graduate School of Biomedical Sciences, Department of Cardiovascular Medicine<br/> Mikami, Shinsuke; Hiroshima University Graduate School of Biomedical Sciences, Department of Cardiovascular Medicine<br/> Iwamoto, Yumiko; Hiroshima University Graduate School of Biomedical Sciences, Department of Cardiovascular Medicine<br/> Kajikawa, Masato; Hiroshima University Graduate School of Biomedical Sciences, Department of Cardiovascular Medicine<br/> Matsumoto, Takeshi; Hiroshima University Graduate School of Biomedical Sciences, Department of Cardiovascular Medicine<br/> Hidaka, Takayuki; Hiroshima University Graduate School of Biomedical Sciences, Department of Cardiovascular Medicine<br/> Kihara, Yasuki; Hiroshima University Graduate School of Biomedical Sciences, Department of Cardiovascular Medicine<br/> Chayama, Kazuaki; Hiroshima University Graduate School of Biomedical Sciences, Department of Medicine and Molecular Science<br/> Goto, Chikara; Hiroshima International University,<br/> Noma, Kensuke; Hiroshima University, Department of Cardiovascular Regeneration and Medicine, Research Institute for Radiation Biology and Medicine<br/> Tomiya, Hirofumi; Tokyo Medical University, The Second Department of Internal Medicine<br/> Takase, Bonpei; National Defense Medical College Research Institute, Tokorozawa, Division of Biomedical Engineering<br/> Yamashina, Akira; Tokyo Medical University, The Second Department of Internal Medicine<br/> Higashi, Yukihito; Research Institute for Radiation Biology and Medicine, Department of Cardiovascular Regeneration and Medicine</p> |
| <b>Primary Subject Heading</b>: | Cardiovascular medicine                                                                                                                                                                                                                                                                                                                                                                                                                                                                                                                                                                                                                                                                                                                                                                                                                                                                                                                                                                                                                                                                                                                                                                                                                                                                                                                                                                                                                                                                                                                                                                                                                                                                                                                                                                                                                                                                                                                                                                                                                                                                                                                                            |

1  
2  
3  
4  
5  
6  
7  
8  
9  
10  
11  
12  
13  
14  
15  
16  
17  
18  
19  
20  
21  
22  
23  
24  
25  
26  
27  
28  
29  
0  
3  
2  
3  
3  
5  
6  
3  
8  
9  
40  
41  
42  
43  
44  
45  
46  
47  
48  
49  
0  
5  
2  
3  
5  
6  
3  
8  
9  
60

|                            |                                                                                |
|----------------------------|--------------------------------------------------------------------------------|
| Secondary Subject Heading: | Diabetes and endocrinology                                                     |
| Keywords:                  | VASCULAR MEDICINE, PATHOLOGY, General endocrinology < DIABETES & ENDOCRINOLOGY |
|                            |                                                                                |

SCHOLARONE™  
Manuscripts

For peer review only



## Hyperuricemia is Independently Associated with Endothelial Dysfunction in Postmenopausal Women but not in Premenopausal Women

Brief title: Hyperuricemia and endothelial function in women

Tatsuya Maruhashi, MD;<sup>1</sup> Ayumu Nakashima, MD, PhD;<sup>2</sup> Junko Soga MD, PhD;<sup>1</sup> Noritaka Fujimura, MD, PhD;<sup>1</sup> Naomi Idei, MD, PhD;<sup>1</sup> Shinsuke Mikami, MD;<sup>1</sup> Yumiko Iwamoto, MD;<sup>1</sup> Masato Kajikawa, MD;<sup>1</sup> Takeshi Matsumoto, MD;<sup>1</sup> Takayuki Hidaka, MD, PhD;<sup>1</sup> Yasuki Kihara, MD, PhD;<sup>1</sup> Kazuaki Chayama, MD, PhD;<sup>3</sup> Chikara Goto, PhD;<sup>4</sup> Kensuke Noma, MD, PhD;<sup>5</sup> Hirofumi Tomiyama, MD, PhD, FAHA;<sup>6</sup> Bonpei Takase, MD, PhD, FAHA;<sup>7</sup> Akira Yamashina, MD, PhD;<sup>6</sup> Yukihiro Higashi, MD, PhD, FAHA<sup>2,5</sup>

<sup>1</sup>Department of Cardiovascular Medicine, Hiroshima University Graduate School of Biomedical Sciences, Hiroshima, Japan

<sup>2</sup>Division of Regeneration and Medicine, Hiroshima University Hospital, Hiroshima, Japan

<sup>3</sup>Department of Medicine and Molecular Science, Hiroshima University Graduate School of Biomedical Sciences, Hiroshima, Japan

<sup>4</sup>Hiroshima International University, Hiroshima, Japan

<sup>5</sup>Department of Cardiovascular Regeneration and Medicine, Research Institute for Radiation Biology and Medicine, Hiroshima University, Hiroshima, Japan

<sup>6</sup>The Second Department of Internal Medicine, Tokyo Medical University, Tokyo, Japan

<sup>7</sup>Division of Biomedical Engineering, National Defense Medical College Research Institute, Tokorozawa, Japan

Address for corresponding: Yukihiro Higashi, MD, PhD, FAHA

Professor and Chair

Department of Cardiovascular Regeneration and Medicine,  
Research Institute for Radiation Biology and Medicine (RIRBM),  
Hiroshima University

1-2-3 Kasumi, Minami-ku, Hiroshima 734-8553, Japan

Fax: +81-82-257-5831, Phone: +81-82-257-5831

E-mail: [yhigashi@hiroshima-u.ac.jp](mailto:yhigashi@hiroshima-u.ac.jp)

Key words: uric acid, endothelial function, flow-mediated vasodilation, menopause

1  
2  
3  
4  
5  
6  
7  
8  
9  
10  
11  
12  
13  
14  
15  
16  
17  
18  
19  
20  
21  
22  
23  
24  
25  
26  
27  
28  
29  
0  
3  
2  
3  
3  
5  
6  
3  
8  
9  
40  
41  
42  
43  
44  
45  
46  
47  
48  
49  
0  
5  
2  
3  
5  
5  
6  
3  
8  
9  
60

Word count: 3612 words

For peer review only

### Abstract

**Objectives:** The purpose of this study was to determine the relationships between uric acid, endothelial function, and cardiovascular risk factors and to investigate whether menopausal status was associated with the relationship between uric acid and endothelial function in women.

**Design:** Cross-sectional study.

**Setting:** Three general hospitals in Japan.

**Participants:** 749 Japanese women aged 30 to 74 years recruited from people who underwent health-screening examinations with agreement for measurement of vascular function.

**Measures:** We measured serum concentrations of uric acid and flow-mediated vasodilation (FMD). Percent of FMD (Peak diameter-Baseline diameter/Baseline diameter) was used for analysis. Endothelial dysfunction was defined as FMD equal to or less than 4.90%, division point for the lowest tertile and the middle tertile of FMD. Menopause women were defined as subjects without menstruation for over 1 year or subjects with a history of hysterectomy or bilateral oophrectomy.

**Results:** Of the 749 subjects, 368 (49.1%) were premenopausal and 381 (50.9%) were postmenopausal women. Age, body mass index, systolic blood pressure, total cholesterol, triglycerides, glucose, estimated glomerular filtration, and Framingham risk score were significantly correlated with serum uric acid level. FMD showed a gradual decrease in accordance with the serum uric acid level in the entire study population (<4.0 mg/dL, 6.85±3.65%; 4.0 to <5.0 mg/dL, 6.79±3.60%; 5.0 to <6.0 mg/dL, 6.24±3.58%; ≥6.0 mg/dL, 5.27±3.18%; P=0.01). Multivariate analysis revealed that uric acid was a significantly independent risk factor for endothelial dysfunction in postmenopausal women (odds ratio; 1.23, 95% confidence interval; 1.01-1.50), but not

1  
2  
3  
4  
5 in premenopausal women.

6  
7 **Conclusions:** These findings suggest that uric acid can be used as a risk marker of  
8  
9 endothelial dysfunction in a female population, and particularly as an independent risk  
10  
11 factor in postmenopausal women but not in premenopausal women.  
12

13  
14  
15 **Registration number of the study:** UMIN000003409  
16  
17  
18  
19  
20  
21  
22  
23  
24  
25  
26  
27  
28  
29  
30  
31  
32  
33  
34  
35  
36  
37  
38  
39  
40  
41  
42  
43  
44  
45  
46  
47  
48  
49  
50  
51  
52  
53  
54  
55  
56  
57  
58  
59  
60

## Article summary

### Article focus:

- To investigate the relationships between uric acid, endothelial function assessed by flow-mediated vasodilation (FMD), and cardiovascular risk factors in women.
- To examine whether menopausal status is associated with the relationship between uric acid and endothelial function in women.

### Key messages

- Uric acid level was significantly associated with cardiovascular parameters and prevalence of cardiovascular risk factors in the entire study population.
- FMD showed a gradual decrease in accordance with the serum uric acid level in the entire study population.
- Uric acid was an independent risk factor for endothelial dysfunction even after adjustment for other cardiovascular risk factors in postmenopausal women, but not in premenopausal women.

### Strengths and limitations of this study

- This study includes a large number of women who underwent flow-mediated vasodilation test.
- This study shows a difference in the relationship between uric acid and endothelial dysfunction depending on menopausal status in women.
- Residual confounding may exist for this cross-sectional study.
- Menopausal status was based on self-report.

## Introduction

Several epidemiological studies have shown a relationship between serum uric acid level and subsequent cardiovascular disease.[1-10] In addition, increase in uric acid level is regarded as an independent marker of increased cardiovascular risk. However, it has remained controversial whether uric acid per se should be considered as a cardiovascular risk factor because of the difficulty in investigating the role of uric acid alone in the pathogenesis, development, and maintenance of atherosclerosis. There are significant relationships between elevated uric acid levels and established cardiovascular risk factors, such as hypertension,[11] metabolic syndrome[12] and kidney disease,[13] all of which are also well known as strong predictors of cardiovascular disease.[14 15] Some investigators have argued that elevated uric acid is not an independent risk factor but rather merely a marker of risk for cardiovascular disease.<sup>1,6,7</sup> However, recent epidemiological studies have demonstrated that uric acid is an independent risk factor for cardiovascular disease.[5 7-10] Although the mechanism by which uric acid causes cardiovascular disease is not fully understood, several lines of evidence suggest that elevated uric acid impairs endothelial function by inducing intracellular oxidative stress and inflammation through activation of the local renin-angiotensin system, particularly angiotensin II, and the pro-oxidant effect of uric acid per se, once absorbed into endothelial cells.[16-18]

Endothelial dysfunction is established in the initial step of atherosclerosis and plays an important role in the development of atherosclerotic conditions, leading to cardiovascular outcomes.[19] Recently, measurement of flow-mediated vasodilation (FMD) as an index of endothelium-dependent vasodilation has been widely used as a method for assessing endothelial function.[20-24] In addition, growing evidence has shown that endothelial function assessed by FMD can serve as an independent predictor

1  
2  
3  
4 of cardiovascular events.[25-28] Recently, several investigators, including us, have  
5 shown a relationship between uric acid and endothelial function assessed by  
6 FMD.[29-34] As for the relationship between uric acid and FMD in men, previous  
7 studies are consistent in demonstrating that uric acid is a significant independent risk  
8 factor for FMD.[29 34] However, there is little information on whether uric acid is an  
9 independent risk factor for endothelial dysfunction in women. In addition, it remains  
10 unclear whether menopausal status is associated with the relationship between uric acid  
11 and endothelial function. It is clinically important to confirm the role of uric acid per se  
12 in atherosclerosis. We therefore investigated the relationships between uric acid, FMD  
13 and cardiovascular risk factors and whether menopausal status was associated with the  
14 relationship between uric acid and endothelial function in women who underwent  
15 health-screening examinations.  
16  
17  
18  
19  
20  
21  
22  
23  
24  
25  
26  
27  
28  
29  
30

## 31 32 33 34 35 36 37 38 39 40 41 42 43 44 45 46 47 48 49 50 51 52 53 54 55 56 57 58 59 60

### Methods

#### Subjects

A total of 5321 Japanese adults aged 17 to 86 years who underwent health-screening examinations with agreement for measurement of vascular function were enrolled in the Flow-mediated Dilation Japan Registry between 1 April 2010 and 31 August 2012 at 3 general hospitals in Japan. All employees have an obligation to undergo health screening every year under the regulations of the Society-managed Health Insurance Union in Japan. In accordance with the regulations, we performed health-screening examinations. From the registry, 895 women aged 30 to 74 years were recruited for this study. Among the 895 subjects, information on serum uric acid levels, menopause, and phases of menstrual was available for 797 subjects. Subjects during menstruation (n=28), subjects receiving hormone replacement therapy (n=3), one subject who was

1  
2  
3  
4 pregnant, subjects who had been previously diagnosed with cardiovascular diseases  
5 (n=15), and one subject who was being treated with an antihyperuricemic drug were  
6 excluded. Finally, 749 women without cardiovascular diseases were enrolled in this  
7 study. Hypertension was defined as systolic blood pressure of  $\geq 140$  mm Hg or diastolic  
8 blood pressure of  $\geq 90$  mm Hg, in a sitting position, on at least 3 different occasions.  
9 [35] Patients with secondary forms of hypertension were excluded in all patients with  
10 hypertension on the basis of complete history; physical examination; radiological and  
11 ultrasound examinations; urinalysis; plasma rennin activity; plasma aldosterone and  
12 norepinephrine concentrations; serum creatinine, potassium, calcium, and free throxine  
13 concentrations; and 24-hour urinary excretion of 17-hydroxycorticosteroids,  
14 17-ketogenic steroids, and vanillylmandelic acid. Diabetes was defined according to the  
15 American Diabetes Association.[36] Dyslipidemia was defined according to the third  
16 report of the National Cholesterol Education Program (NCEP) Expert Panel on  
17 Detection, Evaluation, and Treatment of High Blood Cholesterol in Adults  
18 (ATP-III).[37] We defined smokers as those who were current smokers. Measurement of  
19 FMD was performed without withholding medications. Framingham risk score was  
20 calculated by points of risk factors: age, total cholesterol level, high-density lipoprotein  
21 cholesterol level, systolic blood pressure, and smoking status.[38] Diagnosis of  
22 metabolic syndrome was made according to the criteria of NCEP ATP-III.[37] Thus,  
23 metabolic syndrome was diagnosed when 3 or more of the following risk determinants  
24 were present. (1) waist circumference of  $\geq 88$  cm, (2) triglyceride  $\geq 1.7$  mmol/L (150  
25 mg/dL), (3) high-density lipoprotein cholesterol  $< 1.29$  mmol/L (50 mg/dL), (4) blood  
26 pressure  $\geq 130$  and/or 85 mm Hg, or (5) fasting blood glucose  $\geq 6.11$  mmol/L (110  
27 mg/dL). The estimated glomerular filtration rate (eGFR) was calculated using the  
28 Japanese eGER equation.[39] Chronic kidney disease (CKD) was defined as eGFR  $< 60$   
29  
30  
31  
32  
33  
34  
35  
36  
37  
38  
39  
40  
41  
42  
43  
44  
45  
46  
47  
48  
49  
50  
51  
52  
53  
54  
55  
56  
57  
58  
59  
60



1  
2  
3  
4 mL/min/1.73 m<sup>2</sup>.<sup>[40]</sup> Menopause women were defined as subjects without menstruation  
5  
6 for over 1 year or subjects with a history of hysterectomy or bilateral oophrectomy.<sup>[41]</sup>  
7  
8 The ethical committees of our institutions approved the study protocol. Written  
9  
10 informed consent for participation in the study was obtained from all subjects.  
11  
12

### 13 14 15 **Study protocol**

16  
17 We measured vascular responses to reactive hyperemia in the brachial artery in all  
18  
19 subjects. Subjects fasted the previous night for at least 12 hours. The study began at 8:30  
20  
21 AM. The subjects were kept in the supine position in a quiet, dark, air-conditioned room  
22  
23 (constant temperature of 22°C to 25°C) throughout the study. After remaining in the  
24  
25 supine position for 30 minutes, blood samples were obtained for measurement of basal  
26  
27 fasting serum concentrations of total cholesterol, triglycerides, high-density lipoprotein  
28  
29 cholesterol, low-density lipoprotein cholesterol, creatinine, glucose, and uric acid. Then  
30  
31 FMD was measured. The observers were blind to the form of examination. Serum uric  
32  
33 acid levels were measured by the uricase-peroxidase method (JCA-BM6010; JEOL Ltd.,  
34  
35 Tokyo, Japan). Levels of serum total cholesterol, triglycerides, high-density lipoprotein  
36  
37 cholesterol, low-density lipoprotein cholesterol, and creatinine were enzymatically  
38  
39 measured (JCA-BM6010; JEOL Ltd., Tokyo, Japan). Glucose levels were measured by  
40  
41 the glucose oxidase immobilized oxygen electrode method (GA08II; A&T, Yokohama,  
42  
43 Japan).  
44  
45  
46  
47  
48  
49

### 50 51 **Measurement of FMD**

52  
53 The subjects remained supine throughout the study. The vascular response to reactive  
54  
55 hyperemia in the brachial artery was used for assessment of endothelium-dependent  
56  
57 FMD. A high-resolution linear artery transducer was coupled to computer-assisted  
58  
59  
60

1  
2  
3  
4 analysis software (UNEXEF18G, UNEX Co., Nagoya, Japan) that used an automated  
5 edge detection system for measurement of brachial artery diameter. A blood pressure  
6 cuff was placed around the forearm. The brachial artery was scanned longitudinally 5 to  
7 10 cm above the elbow. When the clearest B-mode image of the anterior and posterior  
8 intimal interfaces between the lumen and vessel wall was obtained, the transducer was  
9 held at the same point throughout the scan by a special probe holder (UNEX Co.) to  
10 ensure consistency of the image. Depth and gain setting were set to optimize the images  
11 of the arterial lumen wall interface. When the tracking gate was placed on the intima,  
12 the artery diameter was automatically tracked, and the waveform of diameter changes  
13 over the cardiac cycle was displayed in real time using the FMD mode of the tracking  
14 system. This allowed the ultrasound images to be optimized at the start of the scan and  
15 the transducer position to be adjusted immediately for optimal tracking performance  
16 throughout the scan. Pulsed Doppler flow was assessed at baseline and during peak  
17 hyperemic flow, which was confirmed to occur within 15 seconds after cuff deflation.  
18 Blood flow velocity was calculated from the Doppler data and was displayed as a  
19 waveform in real time. The baseline longitudinal image of the artery was acquired for  
20 30 seconds, and then the blood pressure cuff was inflated to 50 mm Hg above systolic  
21 pressure for 5 minutes. The longitudinal image of the artery was recorded continuously  
22 until 5 minutes after cuff deflation. Pulsed Doppler velocity signals were obtained for  
23 20 seconds at baseline and for 10 seconds immediately after cuff deflation. Changes in  
24 brachial artery diameter were immediately expressed as percentage change relative to  
25 the vessel diameter before cuff inflation. FMD was automatically calculated as the  
26 percentage change in peak vessel diameter from the baseline value. Percentage of FMD  
27 ( $\text{peak diameter} - \text{baseline diameter} / \text{baseline diameter}$ ) was used for analysis. Blood flow  
28 volume was calculated by multiplying the Doppler flow velocity (corrected for the  
29  
30  
31  
32  
33  
34  
35  
36  
37  
38  
39  
40  
41  
42  
43  
44  
45  
46  
47  
48  
49  
50  
51  
52  
53  
54  
55  
56  
57  
58  
59  
60

1  
2  
3  
4  
5  
6  
7  
8  
9  
10  
11  
12  
13  
14  
15  
16  
17  
18  
19  
20  
21  
22  
23  
24  
25  
26  
27  
28  
29  
30  
31  
32  
33  
34  
35  
36  
37  
38  
39  
40  
41  
42  
43  
44  
45  
46  
47  
48  
49  
50  
51  
52  
53  
54  
55  
56  
57  
58  
59  
60

angle) by heart rate and vessel cross-sectional area ( $-r^2$ ). Reactive hyperemia was calculated as the maximum percentage increase in flow after cuff deflation compared with baseline flow.

### **Statistical analysis**

Results are presented as mean±SD. All reported probability values were 2-sided, and a probability value of <0.05 was considered statistically significant. Categorical variables were compared by means of chi-square test. Comparisons between the groups categorized according to serum uric acid level were carried out using P for trend analysis with Bonferroni's test for post-hoc comparisons. Relations between variables were determined by Spearman correlation coefficients analysis. Stepwise multivariate logistic regression analyses were performed to identify factors associated with endothelial dysfunction among potential confounders ( $P<0.20$ ) in univariate analysis. Using variables associated with endothelial dysfunction in stepwise multiple regression analyses, we performed the final logistic regression analyses for which results are presented in the results section. The data were processed using the software package Stata version 9 (Stata Co., College Station, Texas, USA).

## **Results**

### **Baseline clinical characteristics**

The baseline clinical characteristics are summarized in Table 1. Of the 749 subjects, 112 (15.0%) had hypertension, 262 (35.0%) had dyslipidemia, 34 (4.5%) had diabetes mellitus, 59 (7.9%) were current smokers, 65 (8.7%) had metabolic syndrome, and 56 (8.4%) had chronic kidney disease. Mean Framingham risk score was  $3.94\pm 3.62\%$ . The mean value of serum uric acid level was  $4.44\pm 1.09$  mg/dL (median, 4.30 mg/dL;

interquartile range, 3.80-5.00 mg/dL; range, 0.80 to 10.0 mg/dL). The mean value of FMD was  $6.59 \pm 3.60\%$  (range, -4.70 to 20.1%). Division point for the lowest tertile and the middle tertile of FMD was 4.90%. Therefore, endothelial dysfunction was defined as FMD equal or less than 4.90%.

### **Relationships between serum uric acid level and cardiovascular risk factors**

Univariate regression analysis revealed that serum uric acid level significantly correlated with age ( $r=0.21$ ,  $P<0.001$ ), body mass index ( $r=0.26$ ,  $P<0.001$ ), systolic blood pressure ( $r=0.17$ ,  $P<0.001$ ), diastolic blood pressure ( $r=0.17$ ,  $P<0.001$ ), total cholesterol ( $r=0.23$ ,  $P<0.001$ ), triglycerides ( $r=0.25$ ,  $P<0.001$ ), high-density lipoprotein cholesterol ( $r=-0.13$ ,  $P=0.002$ ), low-density lipoprotein cholesterol ( $r=0.22$ ,  $P<0.001$ ), glucose ( $r=0.12$ ,  $P=0.004$ ), and eGFR ( $r=-0.27$ ,  $P<0.001$ ). Subjects were categorized according to serum uric acid levels (Table 2). Age, body mass index, systolic blood pressure, total cholesterol, triglycerides, glucose, and Framingham risk score were significantly increased and eGFR was significantly decreased with increase in serum uric acid level. As for the prevalence of cardiovascular risk factors, there were significant increases in the prevalence of hypertension, dyslipidemia, current smoking, metabolic syndrome, chronic kidney disease, and menopause in relation to increase in serum uric acid level.

### **Relationships between serum uric acid level and FMD**

Subjects were categorized into 4 groups on the basis of serum uric acid level. FMD was significantly decreased with increase in serum uric acid level ( $<4.0$  mg/dL,  $6.85 \pm 3.65\%$ ;  $4.0$  to  $<5.0$  mg/dL,  $6.79 \pm 3.60\%$ ;  $5.0$  to  $<6.0$  mg/dL,  $6.24 \pm 3.58\%$ ;  $\geq 6.0$  mg/dL,  $5.27 \pm 3.18\%$ ;  $P$  for trend = 0.01, Figure 1). Multiple logistic regression analysis revealed

1  
2  
3  
4  
5 that serum uric acid level was significantly associated with endothelial dysfunction after  
6 adjustment for age (odds ratio, 1.20; 95% confident interval [CI], 1.03 to 1.39) (Table 3).  
7  
8  
9 However, after adjustment for other risk factors, including high-density lipoprotein  
10 cholesterol, glucose, and smoking status, the significant association between serum uric  
11 acid level and endothelial dysfunction disappeared (odds ratio, 1.13; 95% CI, 0.97 to  
12 1.32).  
13  
14  
15  
16  
17  
18  
19

### 20 **Difference in the relationship between serum uric acid level and endothelial** 21 **dysfunction according to menopausal status**

22  
23  
24 Subjects were divided into two groups according to menopausal status to investigate the  
25 influence of menopause on the relationship between serum uric acid level and  
26 endothelial function (supplemental Table I). Of the 749 subjects, 368 (49.1%) were  
27 premenopausal and 381 (50.9%) were postmenopausal women. Postmenopausal women  
28 were significantly older than premenopausal women (58.6±6.3 vs. 41.5±6.1 years,  
29 P<0.001). The ages ranged from 30 to 54 years in premenopausal women and 31 to 74  
30 years in postmenopausal women. Serum uric acid level was significantly higher in  
31 postmenopausal women than in premenopausal women (4.64±1.11 vs. 4.24±1.03 mg/dL,  
32 P<0.001). FMD was significantly impaired in postmenopausal women compared to that  
33 in premenopausal women (5.51±3.14 vs. 7.77±3.71%, P<0.001), and the prevalence of  
34 endothelial dysfunction was significantly higher in postmenopausal women than  
35 premenopausal women (66.4% vs. 34.0%, P<0.001). In postmenopausal women,  
36 multiple logistic regression analysis revealed that serum uric acid level was significantly  
37 associated with endothelial dysfunction after adjustment for age (odds ratio, 1.26; 95%  
38 CI, 1.05 to 1.53) (Table 4). The significant association between serum uric acid level  
39 and endothelial dysfunction persisted after adjustment for other risk factors (odds ratio,  
40  
41  
42  
43  
44  
45  
46  
47  
48  
49  
50  
51  
52  
53  
54  
55  
56  
57  
58  
59  
60

1  
2  
3  
4 1.23; 95% CI, 1.01 to 1.50). In contrast, there was no significant association between  
5 serum uric acid level and endothelial dysfunction in premenopausal women (odds ratio,  
6 1.14; 95% CI, 0.90 to 1.44) (Table 4). After adjustment for other risk parameters, the  
7 association between uric acid level and endothelial dysfunction remained insignificant  
8 (odds ratio, 0.98; 95% CI, 0.75 to 1.26).  
9  
10  
11  
12  
13  
14  
15  
16  
17

### 18 Discussion

19  
20 In the present study, we demonstrated that uric acid level was significantly associated  
21 with cardiovascular parameters and prevalence of cardiovascular risk factors. Although  
22 FMD showed a graded decrease according to serum uric acid level, uric acid was not an  
23 independent risk factor for endothelial dysfunction after adjustment for other  
24 cardiovascular risk parameters. However, when subjects were divided into two groups  
25 according to menopausal status, uric acid was a significantly independent risk factor for  
26 endothelial dysfunction even after adjustment for other cardiovascular risk parameters  
27 in postmenopausal women, but not in premenopausal women. To our knowledge, this is  
28 the first report showing a difference in the relationship between uric acid and  
29 endothelial dysfunction depending on menopausal status in women.  
30  
31  
32  
33  
34  
35  
36  
37  
38  
39  
40

41 As a marker of atherosclerotic diseases, it has been demonstrated that serum uric  
42 acid level is associated with cardiovascular risk factors and subclinical atherosclerosis,  
43 such as hypertension,[11] metabolic syndrome,[12] kidney disease,[13] coronary artery  
44 calcification,[42] and carotid atherosclerosis.[43] In the present study, we confirmed  
45 that serum uric acid level was significantly associated with age, body mass index,  
46 systolic blood pressure, total cholesterol, triglycerides, glucose, and eGFR, most of  
47 which are components of metabolic syndrome and CKD. Indeed, the prevalence of  
48 hypertension, dyslipidemia, metabolic syndrome, and CKD was linearly increased in  
49  
50  
51  
52  
53  
54  
55  
56  
57  
58  
59  
60

1  
2  
3  
4 relation to increase in serum uric acid level. An association between uric acid and  
5 metabolic syndrome has been demonstrated by the fact that uric acid level is often  
6 elevated in subjects with metabolic syndrome and that the prevalence of metabolic  
7 syndrome linearly increases in relation to uric acid level.[12 43] The mechanism behind  
8 the association between increase in serum uric acid level and metabolic syndrome is  
9 thought to be hyperinsulinemia, mediated by insulin resistance and visceral adiposity,  
10 leading to an increase in uric acid absorption in renal tubules.[44] Uric acid levels are  
11 also frequently elevated in patients with kidney disease as a result of reduction in GFR  
12 and renal urate excretion.[45] In addition, several epidemiological studies have shown a  
13 link between elevated serum uric acid level and subsequent cardiovascular events.[1-10]  
14 The association between serum uric acid level and cardiovascular disease has been  
15 reported to be generally stronger in women than in men.[9 46-48] These findings  
16 suggest that uric acid level is a biochemical marker of atherosclerotic disease and a  
17 useful predictor of the development of cardiovascular diseases.

18  
19  
20  
21  
22  
23  
24  
25  
26  
27  
28  
29  
30  
31  
32  
33  
34  
35  
36  
37  
38  
39  
40  
41  
42  
43  
44  
45  
46  
47  
48  
49  
50  
51  
52  
53  
54  
55  
56  
57  
58  
59  
60

Despite the association between elevated uric acid level and cardiovascular conditions, uric acid has not been established as an independent causal risk factor for cardiovascular disease because of the link between uric acid and established cardiovascular risk factors. Another possible explanation for the difficulty in determining the role of uric acid in cardiovascular disease is that uric acid may function as an powerful antioxidant and as a scavenger of singlet oxygen and radicals.[49 50] In patients with cardiovascular disease, an increase in uric acid level, therefore, might be considered as a compensatory mechanism to counteract the oxidative stress induced in these conditions. Although it remains controversial whether uric acid is a causative factor or merely a marker of cardiovascular disease, some epidemiological studies have demonstrated that the association between uric acid and cardiovascular disease remains

1  
2  
3  
4  
5  
6  
7  
8  
9  
10  
11  
12  
13  
14  
15  
16  
17  
18  
19  
20  
21  
22  
23  
24  
25  
26  
27  
28  
29  
30  
31  
32  
33  
34  
35  
36  
37  
38  
39  
40  
41  
42  
43  
44  
45  
46  
47  
48  
49  
50  
51  
52  
53  
54  
55  
56  
57  
58  
59  
60

significant even after adjustment for concomitant risk factors, suggesting that uric acid per se is an independent risk factor for cardiovascular disease.[5 7-10]

Although the precise mechanism behind the relationship between uric acid and cardiovascular disease remains to be elucidated, growing evidence indicates that endothelial dysfunction induced by uric acid plays an important role in the development of cardiovascular disease.[45] Several lines of evidence suggest that uric acid also has proinflammatory effects on endothelial cells, leading to reduction of endothelial nitric oxide bioavailability and consequent endothelial dysfunction.[17 18] Yu et al.[18] demonstrated that uric acid enhances the production of reactive oxygen species by activation of the local renin-angiotensin system, particularly angiotensin II, in human endothelial vascular cells and that probenecid, an inhibitor of urate transporter, inhibits uric acid-induced oxidative stress. Thus, uric acid is thought to mediate endothelial dysfunction by generating oxidative stress once absorbed into endothelial cells. In a clinical setting, measurement of FMD as an index of endothelium-dependent vasodilation in the brachial artery using high-resolution ultrasound has been widely used as a method for assessing vascular function.[20-23] Although several investigators have shown that uric acid inversely correlates with FMD and that uric acid is an independent predictor of FMD, the subjects in those studies were limited to a small number of subjects or highly selected subjects, such as patients with increased cardiovascular risk,[30] hyperuricemia,[32] or nondiabetic CKD.[33] In addition, uric acid has been shown to be a significantly independent risk factor for endothelial dysfunction in men in an analysis of a large population,[34] but there is little information on the relationship between uric acid and FMD in women. As a risk marker, we demonstrated that serum uric acid level was significantly associated with FMD in women. FMD was significantly impaired with increase in serum uric acid level. FMD is



1  
2  
3  
4  
5 known to be impaired as a consequence of cumulative cardiovascular risk factors.[21  
6  
7 51] Therefore, significant decrease in FMD according to serum uric acid level may  
8  
9 reflect significant associations between uric acid and other cardiovascular risk factors,  
10  
11 including hypertension, dyslipidemia, metabolic syndrome, and CKD, as a risk marker  
12  
13 for cardiovascular disease in women. These findings provide a rationale for the  
14  
15 relationships of uric acid with cardiovascular disease and mortality being generally  
16  
17 strong in women.  
18

19  
20 As for the role of uric acid as a causal risk factor in endothelial function,  
21  
22 multivariate analysis performed for the entire population indicated that uric acid was not  
23  
24 an independent predictor of endothelial dysfunction after adjustment for other risk  
25  
26 factors. However, when subjects were divided into two groups according to menopausal  
27  
28 status, multivariate analyses revealed that uric acid was a significantly independent risk  
29  
30 factor for endothelial dysfunction in postmenopausal women but not in premenopausal  
31  
32 women. The incidence of cardiovascular diseases in women is lower than that in men  
33  
34 until around the age of menopause, after which it markedly increases and becomes equal  
35  
36 to that of their male counterparts, suggesting a protective effect of endogenous ovarian  
37  
38 hormones on atherosclerosis.[52] Ovarian hormones, especially estradiol, have been  
39  
40 suggested to have protective effects on endothelial function.[53 54] In addition to its  
41  
42 protective effect on endothelial function, estradiol has been shown to lower uric acid  
43  
44 level through mechanisms involving renal clearance, secretion and reabsorption.[55-57]  
45  
46 Therefore, endogenous estradiol may preserve endothelial function and lower serum  
47  
48 uric acid level regardless of the presence or absence of cardiovascular risk factors,  
49  
50 resulting in the weak relationship between uric acid and endothelial dysfunction in  
51  
52 premenopausal women. Our findings in the analysis of premenopausal women are  
53  
54 consistent with the results of a previous study demonstrating that uric acid was not an  
55  
56  
57  
58  
59  
60

1  
2  
3  
4 independent risk factor of FMD in young women aged 30 to 45 years.[58] In contrast to  
5 premenopausal women, uric acid remained a significantly independent risk for  
6 endothelial dysfunction even after adjustment for other risk factors in postmenopausal  
7 women. Although Maxwell et al.[29] reported that uric acid was not an independent  
8 determinant of FMD in women, the non-independent association between FMD and uric  
9 acid observed in their study may be, in part, attributed to inclusion of entire women in  
10 the analysis for the relationship between FMD and uric acid without taking into account  
11 menopausal status. The increased cardiovascular risk in postmenopausal women has  
12 been suggested to be associated with impairment of endothelial function after  
13 menopause.[59 60] There is a possibility that treatment of hyperuricemia in  
14 postmenopausal women will improve endothelial function, leading to a decrease in  
15 cardiovascular events.  
16  
17  
18  
19  
20  
21  
22  
23  
24  
25  
26  
27  
28  
29

0  
1 There were some limitations in this study. The cross-sectional design did not  
2 allow us to establish a definitive causal relationship between hyperuricemia and  
3 endothelial dysfunction. In addition, multiple factors, such as vitamins, phosphate and  
4 statin use, that are known to influence FMD and residual unrecognized confounding  
5 factors were not taken into account in this study. Future prospective and interventional  
6 studies are certainly warranted to obtain more specific conclusions as to whether  
7 hyperuricemia should be treated, which subgroup should be treated, and whether  
8 treatment of hyperuricemia improves endothelial function with subsequent decrease in  
9 cardiovascular events.  
10  
11  
12  
13  
14  
15  
16  
17  
18  
19  
20  
21  
22  
23  
24  
25  
26  
27  
28  
29

0  
1 In conclusion, uric acid is a useful marker for endothelial function in women.  
2 Significant relationships between serum uric acid level and cardiovascular risk factors,  
3 including hypertension, dyslipidemia, metabolic syndrome, and CKD, may result in the  
4 significant association between FMD and serum uric acid level, as a risk marker of  
5  
6  
7  
8  
9  
10

1  
2  
3  
4 atherosclerotic diseases. Uric acid, as a causal cardiovascular risk factor, may be an  
5  
6 independent risk for endothelial dysfunction in postmenopausal women but not in  
7  
8 premenopausal women. Further studies are needed to investigate whether treatment for  
9  
10 hyperuricemia improves endothelial function in postmenopausal women.  
11  
12  
13  
14  
15  
16  
17  
18  
19  
20  
21  
22  
23  
24  
25  
26  
27  
28  
29  
30  
31  
32  
33  
34  
35  
36  
37  
38  
39  
40  
41  
42  
43  
44  
45  
46  
47  
48  
49  
50  
51  
52  
53  
54  
55  
56  
57  
58  
59  
60

Table 1. Clinical Characteristics of the Subjects

| Variables                             | Total<br>(n=749) |
|---------------------------------------|------------------|
| Age, y                                | 50.2±10.6        |
| Body mass index, kg/m <sup>2</sup>    | 22.0±3.4         |
| Systolic blood pressure, mm Hg        | 121.1±19.0       |
| Diastolic blood pressure, mm Hg       | 73.9±12.4        |
| Heart rate, bpm                       | 64.4±10.2        |
| Total cholesterol, mmol/L             | 5.37±0.88        |
| Triglycerides, mmol/L                 | 1.07±0.71        |
| HDL-cholesterol, mmol/L               | 1.80±0.42        |
| LDL-cholesterol, mmol/L               | 3.11±0.77        |
| Glucose, mmol/L                       | 5.32±1.47        |
| Uric acid, mg/dL                      | 4.44±1.09        |
| eGFR, mL/min/1.73 m <sup>2</sup>      | 77.1±13.3        |
| Framingham risk score, %              | 3.94±3.62        |
| Hypertension, n (%)                   | 112 (15.0)       |
| Dyslipidemia, n (%)                   | 262 (35.0)       |
| Diabetes mellitus, n (%)              | 34 (4.5)         |
| Smoking, n (%)                        | 59 (7.9)         |
| Metabolic syndrome, n (%)             | 65 (8.7)         |
| Chronic kidney disease, n (%)         | 56 (8.4)         |
| Menopause, n (%)                      | 381 (50.9)       |
| Flow-mediated vasodilation, %         | 6.59±3.60        |
| Baseline brachial artery diameter, mm | 3.40±0.47        |

HDL indicates high-density lipoprotein; LDL, low-density lipoprotein; eGFR, estimated glomerular filtration rate.

Table 2. Clinical Characteristics according to Serum Uric Acid Levels \*†§

| Variables                             | Uric acid categories, mg/dL |                        |                        |                | P value |
|---------------------------------------|-----------------------------|------------------------|------------------------|----------------|---------|
|                                       | <4.0<br>(n=245)             | 4.0 to <5.0<br>(n=302) | 5.0 to <6.0<br>(n=144) | 6.0≤<br>(n=58) |         |
| Uric acid, mg/dL                      | 3.38±0.54                   | 4.42±0.28              | 5.33±0.26              | 6.90±0.90      |         |
| Age, y                                | 48.3±10.9                   | 49.4±10.1              | 53.5±9.9*†             | 54.7±10.0*†    | <0.001  |
| Body mass index, kg/m <sup>2</sup>    | 20.8±2.8                    | 22.0±3.4*              | 23.0±3.3*†             | 24.2±3.9*†     | <0.001  |
| Systolic blood pressure, mm Hg        | 117.2±17.6                  | 120.4±18.3             | 125.9±20.4*†           | 129.2±20.5*†   | <0.001  |
| Diastolic blood pressure, mm Hg       | 71.5±11.4                   | 73.6±12.1              | 77.4±13.4*†            | 77.0±12.5*     | <0.001  |
| Heart rate, bpm                       | 64.6±9.6                    | 63.5±0.6               | 65.5±12.4              | 65.8±11.1      | 0.14    |
| Total cholesterol, mmol/L             | 5.20±0.82                   | 5.33±0.86              | 5.60±0.91*†            | 5.67±0.88*†    | <0.001  |
| Triglycerides, mmol/L                 | 0.89±0.51                   | 0.97±0.50              | 1.32±0.81*†            | 1.69±1.32*†§   | <0.001  |
| HDL-cholesterol, mmol/L               | 1.83±0.38                   | 1.83±0.41              | 1.69±0.45*†            | 1.69±0.54      | 0.001   |
| LDL-cholesterol, mmol/L               | 3.00±0.70                   | 3.10±0.77              | 3.31±0.80*             | 3.19±0.96      | 0.006   |
| Glucose, mmol/L                       | 5.09±0.84                   | 5.28±1.38              | 5.52±2.00*             | 6.03±2.09*†    | <0.001  |
| eGFR, mL/min/1.73 m <sup>2</sup>      | 80.9±13.7                   | 76.8±12.1*             | 74.4±13.0*             | 67.7±13.8*†§   | <0.001  |
| Flow-mediated vasodilation, %         | 6.85±3.65                   | 6.79±3.60              | 6.24±3.58              | 5.27±3.18*†    | 0.01    |
| Baseline brachial artery diameter, mm | 3.35±0.46                   | 3.40±0.48              | 3.43±0.46              | 3.61±0.51*†    | 0.002   |
| Framingham risk score, %              | 3.27±3.44                   | 3.49±2.98              | 5.08±3.65*†            | 6.33±5.42*†    | <0.001  |
| Hypertension, n (%)                   | 25 (10.2)                   | 34 (11.3)              | 34 (23.6)*†            | 19 (32.8)*†    | <0.001  |
| Dyslipidemia, n (%)                   | 59 (24.1)                   | 90 (29.8)              | 72 (50.0)*†            | 41 (70.7)*†§   | <0.001  |
| Diabetes mellitus, n (%)              | 9 (3.7)                     | 8 (2.7)                | 9 (6.3)                | 8 (13.8)*†     | 0.008   |
| Smoking, n (%)                        | 12 (4.9)                    | 23 (7.6)               | 15 (10.4)              | 9 (15.5)       | 0.04    |
| Metabolic syndrome, n (%)             | 12 (4.9)                    | 18 (6.0)               | 19 (13.2)*             | 16 (28.1)*†    | <0.001  |
| Chronic kidney disease, n (%)         | 10 (4.6)                    | 22 (7.9)               | 14 (10.9)              | 10 (24.4)*†    | 0.001   |
| Menopause, n (%)                      | 103 (42.0)                  | 146 (48.3)             | 91 (63.2)*†            | 41 (70.7)*†    | <0.001  |
| Endothelial dysfunction, n (%)        | 75 (30.6)                   | 87 (28.8)              | 50 (34.7)              | 32 (55.2)*†§   | 0.002   |

HDL indicates high-density lipoprotein; LDL, low-density lipoprotein; eGFR, estimated glomerular filtration rate; P values for comparisons across the uric acid categories were performed with ANOVA for continuous variables and  $\chi^2$  test for categorical variables.

\*P<0.05 vs. serum uric acid level <4.0 mg/dL group, †P<0.05 vs. serum uric acid level 4.0 to <5.0 mg/dL group, §P<0.05 vs. serum uric acid level 5.0 to <6.0 mg/dL group.

Table 3. Multivariate Analysis of the Relation Between Endothelial Dysfunction and Variables

| Model | Variables         | Odds ratio (95%CI)  | P value |
|-------|-------------------|---------------------|---------|
| 1     | Uric acid (mg/dL) | 1.30 (1.13 to 1.50) | <0.001  |
| 2     | 1+age             | 1.20 (1.03 to 1.39) | 0.02    |
| 3     | 2+other variables | 1.13 (0.97 to 1.32) | 0.11    |

Initial factors included in the model 3 were body mass index, systolic blood pressure, total cholesterol, triglycerides, high-density lipoprotein cholesterol, low-density lipoprotein cholesterol, glucose, eGFR, and smoking. Using stepwise multiple regression analysis, we selected high-density lipoprotein cholesterol, glucose, and smoking as independent factors for endothelial dysfunction (other variables).

Table 4. Multivariate Analysis of the Relation Between Endothelial Dysfunction and Variables

| Model | Covariates        | Post-menopausal     |         | Pre-menopausal      |         |
|-------|-------------------|---------------------|---------|---------------------|---------|
|       |                   | Odds ratio (95% CI) | P value | Odds ratio (95% CI) | P value |
| 1     | Uric acid (mg/dL) | 1.27(1.05 to 1.53)  | 0.01    | 1.14 (0.90 to 1.44) | 0.28    |
| 2     | 1+age             | 1.26 (1.05 to 1.53) | 0.02    | 1.12 (0.85 to 1.39) | 0.50    |
| 3     | 2+other variables | 1.23 (1.01 to 1.50) | 0.04    | 0.98 (0.75 to 1.26) | 0.85    |

Other variables: high-density lipoprotein cholesterol, glucose, and smoking.

### Author Contributions

Tatsuya Maruhashi and Yukihiro Higashi, drafting the article and conception of this study; Junko Soga, Noritaka Fujimura, Naomi Idei, Shinsuke Mikami, Yumiko Iwamoto, Masato Kajikawa, Takeshi Matsumoto, Takayuki Hidaka, Chikara Goto, Kensuke Noma, Ayumu Nakashima, Bonpei Takase, and Hirofumi Tomiyama, performing the ultrasonography; Kazuaki Chayama, Yasuki Kihara, Akira Yamashina, revising the article critically for important intellectual content.

### Acknowledgments

We thank Megumi Wakisaka, Miki Kumiji, Kiichiro Kawano and Satoko Michiyama for their excellent secretarial assistance.

### Competing interests

None.

### Funding

This study was supported in part by a Grant-in-Aid for Scientific Research from the Ministry of Education, Science and Culture of Japan (1859081500 and 21590898) and a Grant in Aid of Japanese Arteriosclerosis Prevention Fund.

### Data sharing

There is no additional unpublished data from the study.



## References

1. Reunanen A, Takkunen H, Knekt P, et al. Hyperuricemia as a risk factor for cardiovascular mortality. *Acta Med Scand Suppl* 1982;**668**:49-59
2. Levine W, Dyer AR, Shekelle RB, et al. Serum uric acid and 11.5-year mortality of middle-aged women: findings of the Chicago Heart Association Detection Project in Industry. *J Clin Epidemiol* 1989;**42**(3):257-67
3. Wannamethee SG, Shaper AG, Whincup PH. Serum urate and the risk of major coronary heart disease events. *Heart* 1997;**78**(2):147-53
4. Lehto S, Niskanen L, Ronnema T, et al. Serum uric acid is a strong predictor of stroke in patients with non-insulin-dependent diabetes mellitus. *Stroke* 1998;**29**(3):635-9
5. Alderman MH, Cohen H, Madhavan S, et al. Serum uric acid and cardiovascular events in successfully treated hypertensive patients. *Hypertension* 1999;**34**(1):144-50
6. Culeton BF, Larson MG, Kannel WB, et al. Serum uric acid and risk for cardiovascular disease and death: the Framingham Heart Study. *Ann Intern Med* 1999;**131**(1):7-13
7. Moriarty JT, Folsom AR, Iribarren C, et al. Serum uric acid and risk of coronary heart disease: Atherosclerosis Risk in Communities (ARIC) Study. *Ann Epidemiol* 2000;**10**(3):136-43
8. Verdecchia P, Schillaci G, Reboldi G, et al. Relation between serum uric acid and risk of cardiovascular disease in essential hypertension. The PIUMA study. *Hypertension* 2000;**36**(6):1072-8
9. Fang J, Alderman MH. Serum uric acid and cardiovascular mortality the NHANES I epidemiologic follow-up study, 1971-1992. *National Health and Nutrition*

- 1  
2  
3  
4  
5 Examination Survey. *Jama* 2000;**283**(18):2404-10  
6  
7  
8  
9  
10  
11  
12  
13  
14  
15  
16  
17  
18  
19  
20  
21  
22  
23  
24  
25  
26  
27  
28  
29  
30  
31  
32  
33  
34  
35  
36  
37  
38  
39  
40  
41  
42  
43  
44  
45  
46  
47  
48  
49  
50  
51  
52  
53  
54  
55  
56  
57  
58  
59  
60
10. Ioachimescu AG, Brennan DM, Hoar BM, et al. Serum uric acid is an independent predictor of all-cause mortality in patients at high risk of cardiovascular disease: a preventive cardiology information system (PreCIS) database cohort study. *Arthritis Rheum* 2008;**58**(2):623-30
11. Cannon PJ, Stason WB, Demartini FE, et al. Hyperuricemia in primary and renal hypertension. *N Engl J Med* 1966;**275**(9):457-64
12. Ford ES, Li C, Cook S, et al. Serum concentrations of uric acid and the metabolic syndrome among US children and adolescents. *Circulation* 2007;**115**(19):2526-32
13. Siu YP, Leung KT, Tong MK, et al. Use of allopurinol in slowing the progression of renal disease through its ability to lower serum uric acid level. *Am J Kidney Dis* 2006;**47**(1):51-9
14. Feig DI, Kang DH, Johnson RJ. Uric acid and cardiovascular risk. *N Engl J Med* 2008;**359**(17):1811-21
15. Gagliardi AC, Miname MH, Santos RD. Uric acid: A marker of increased cardiovascular risk. *Atherosclerosis* 2009;**202**(1):11-7
16. Khosla UM, Zharikov S, Finch JL, et al. Hyperuricemia induces endothelial dysfunction. *Kidney Int* 2005;**67**(5):1739-42
17. Kang DH, Park SK, Lee IK, et al. Uric acid-induced C-reactive protein expression: implication on cell proliferation and nitric oxide production of human vascular cells. *J Am Soc Nephrol* 2005;**16**(12):3553-62
18. Yu MA, Sanchez-Lozada LG, Johnson RJ, et al. Oxidative stress with an activation of the renin-angiotensin system in human vascular endothelial cells as a novel mechanism of uric acid-induced endothelial dysfunction. *J Hypertens*

- 2010;**28**(6):1234-42
19. Ross R. Atherosclerosis--an inflammatory disease. *N Engl J Med* 1999;**340**(2):115-26
20. Celermajer DS, Sorensen KE, Gooch VM, et al. Non-invasive detection of endothelial dysfunction in children and adults at risk of atherosclerosis. *Lancet* 1992;**340**(8828):1111-5
21. Benjamin EJ, Larson MG, Keyes MJ, et al. Clinical correlates and heritability of flow-mediated dilation in the community: the Framingham Heart Study. *Circulation* 2004;**109**(5):613-9
22. Idei N, Nishioka K, Soga J, et al. Vascular function and circulating progenitor cells in thromboangitis obliterans (Buerger's disease) and atherosclerosis obliterans. *Hypertension* 2011;**57**(1):70-8
23. Soga J, Noma K, Hata T, et al. Rho-associated kinase activity, endothelial function, and cardiovascular risk factors. *Arterioscler Thromb Vasc Biol* 2011;**31**(10):2353-9
24. Fujimura N, Noma K, Hata T, et al. Mineralocorticoid receptor blocker eplerenone improves endothelial function and inhibits Rho-associated kinase activity in patients with hypertension. *Clin Pharmacol Ther* 2012;**91**(2):289-97
25. Modena MG, Bonetti L, Coppi F, et al. Prognostic role of reversible endothelial dysfunction in hypertensive postmenopausal women. *J Am Coll Cardiol* 2002;**40**(3):505-10
26. Gokce N, Keaney JF, Jr., Hunter LM, et al. Risk stratification for postoperative cardiovascular events via noninvasive assessment of endothelial function: a prospective study. *Circulation* 2002;**105**(13):1567-72
27. Brevetti G, Silvestro A, Schiano V, et al. Endothelial dysfunction and cardiovascular

- 1  
2  
3  
4 risk prediction in peripheral arterial disease: additive value of flow-mediated  
5  
6 dilation to ankle-brachial pressure index. *Circulation* 2003;**108**(17):2093-8  
7  
8
- 9 28. Lerman A, Zeiher AM. Endothelial function: cardiac events. *Circulation*  
10  
11 2005;**111**(3):363-8  
12
- 13 29. Maxwell AJ, Bruinsma KA. Uric acid is closely linked to vascular nitric oxide  
14  
15 activity. Evidence for mechanism of association with cardiovascular disease. *J*  
16  
17 *Am Coll Cardiol* 2001;**38**(7):1850-8  
18
- 19 30. Mercurio G, Vitale C, Cerquetani E, et al. Effect of hyperuricemia upon endothelial  
20  
21 function in patients at increased cardiovascular risk. *Am J Cardiol*  
22  
23 2004;**94**(7):932-5  
24
- 25 31. Kato M, Hisatome I, Tomikura Y, et al. Status of endothelial dependent vasodilation  
26  
27 in patients with hyperuricemia. *Am J Cardiol* 2005;**96**(11):1576-8  
28
- 29 32. Ho WJ, Tsai WP, Yu KH, et al. Association between endothelial dysfunction and  
30  
31 hyperuricaemia. *Rheumatology (Oxford)* 2010;**49**(10):1929-34  
32
- 33 33. Kanbay M, Yilmaz MI, Sonmez A, et al. Serum uric acid level and endothelial  
34  
35 dysfunction in patients with nondiabetic chronic kidney disease. *Am J Nephrol*  
36  
37 2011;**33**(4):298-304  
38
- 39 34. Tomiyama H, Higashi Y, Takase B, et al. Relationships among hyperuricemia,  
40  
41 metabolic syndrome, and endothelial function. *Am J Hypertens*  
42  
43 2011;**24**(7):770-4  
44
- 45 35. Chobanian AV, Bakris GL, Black HR, et al. The Seventh Report of the Joint  
46  
47 National Committee on Prevention, Detection, Evaluation, and Treatment of  
48  
49 High Blood Pressure: the JNC 7 report. *Jama* 2003;**289**(19):2560-72  
50
- 51 36. American Diabetes Association: clinical practice recommendations 1999. *Diabetes*  
52  
53 *Care* 1999;**22 Suppl 1**:S1-114  
54  
55  
56  
57  
58  
59  
60

- 1  
2  
3  
4  
5  
6  
7  
8  
9  
10  
11  
12  
13  
14  
15  
16  
17  
18  
19  
20  
21  
22  
23  
24  
25  
26  
27  
28  
29  
0  
3  
2  
3  
3  
5  
6  
7  
8  
9  
40  
41  
42  
43  
44  
45  
46  
47  
48  
49  
6  
5  
2  
3  
5  
6  
7  
8  
9  
60
37. Executive Summary of The Third Report of The National Cholesterol Education Program (NCEP) Expert Panel on Detection, Evaluation, And Treatment of High Blood Cholesterol In Adults (Adult Treatment Panel III). *Jama* 2001;**285**(19):2486-97
38. Wilson PW, Castelli WP, Kannel WB. Coronary risk prediction in adults (the Framingham Heart Study). *Am J Cardiol* 1987;**59**(14):91G-94G
39. Matsuo S, Imai E, Horio M, et al. Revised equations for estimated GFR from serum creatinine in Japan. *Am J Kidney Dis* 2009;**53**(6):982-92
40. K/DOQI clinical practice guidelines for chronic kidney disease: evaluation, classification, and stratification. *Am J Kidney Dis* 2002;**39**(2 Suppl 1):S1-266
41. McKinlay SM. The normal menopause transition: an overview. *Maturitas* 1996;**23**(2):137-45
42. Coutinho Tde A, Turner ST, Peyser PA, et al. Associations of serum uric acid with markers of inflammation, metabolic syndrome, and subclinical coronary atherosclerosis. *Am J Hypertens* 2007;**20**(1):83-9
43. Ishizaka N, Ishizaka Y, Toda E, et al. Association between serum uric acid, metabolic syndrome, and carotid atherosclerosis in Japanese individuals. *Arterioscler Thromb Vasc Biol* 2005;**25**(5):1038-44
44. Quinones Galvan A, Natali A, Baldi S, et al. Effect of insulin on uric acid excretion in humans. *Am J Physiol* 1995;**268**(1 Pt 1):E1-5
45. Johnson RJ, Kang DH, Feig D, et al. Is there a pathogenetic role for uric acid in hypertension and cardiovascular and renal disease? *Hypertension* 2003;**41**(6):1183-90
46. Bengtsson C, Lapidus L, Stendahl C, et al. Hyperuricaemia and risk of cardiovascular disease and overall death. A 12-year follow-up of participants in

- 1  
2  
3  
4 the population study of women in Gothenburg, Sweden. *Acta Med Scand*  
5 1988;**224**(6):549-55  
6  
7  
8  
9 47. Freedman DS, Williamson DF, Gunter EW, et al. Relation of serum uric acid to  
10 mortality and ischemic heart disease. The NHANES I Epidemiologic Follow-up  
11 Study. *Am J Epidemiol* 1995;**141**(7):637-44  
12  
13  
14 48. Tuttle KR, Short RA, Johnson RJ. Sex differences in uric acid and risk factors for  
15 coronary artery disease. *Am J Cardiol* 2001;**87**(12):1411-4  
16  
17  
18 49. Ames BN, Cathcart R, Schwiers E, et al. Uric acid provides an antioxidant defense  
19 in humans against oxidant- and radical-caused aging and cancer: a hypothesis.  
20 *Proc Natl Acad Sci U S A* 1981;**78**(11):6858-62  
21  
22  
23 50. Nieto FJ, Iribarren C, Gross MD, et al. Uric acid and serum antioxidant capacity: a  
24 reaction to atherosclerosis? *Atherosclerosis* 2000;**148**(1):131-9  
25  
26  
27  
28 51. Celermajer DS, Sorensen KE, Bull C, et al. Endothelium-dependent dilation in the  
29 systemic arteries of asymptomatic subjects relates to coronary risk factors and  
30 their interaction. *J Am Coll Cardiol* 1994;**24**(6):1468-74  
31  
32  
33 52. Lerner DJ, Kannel WB. Patterns of coronary heart disease morbidity and mortality  
34 in the sexes: a 26-year follow-up of the Framingham population. *Am Heart J*  
35 1986;**111**(2):383-90  
36  
37  
38 53. Lieberman EH, Gerhard MD, Uehata A, et al. Estrogen improves  
39 endothelium-dependent, flow-mediated vasodilation in postmenopausal women.  
40 *Ann Intern Med* 1994;**121**(12):936-41  
41  
42  
43 54. Hashimoto M, Akishita M, Eto M, et al. Modulation of endothelium-dependent  
44 flow-mediated dilatation of the brachial artery by sex and menstrual cycle.  
45 *Circulation* 1995;**92**(12):3431-5  
46  
47  
48 55. Nicholls A, Snaith ML, Scott JT. Effect of oestrogen therapy on plasma and urinary  
49  
50  
51  
52  
53  
54  
55  
56  
57  
58  
59  
60

- 1  
2  
3  
4  
5  
6  
7  
8  
9  
10  
11  
12  
13  
14  
15  
16  
17  
18  
19  
20  
21  
22  
23  
24  
25  
26  
27  
28  
29  
0  
3  
2  
3  
3  
5  
6  
7  
8  
9  
40  
41  
42  
43  
44  
45  
46  
47  
48  
49  
0  
5  
2  
3  
5  
6  
7  
8  
9  
60
- levels of uric acid. *Br Med J* 1973;**1**(5851):449-51
56. Hak AE, Choi HK. Menopause, postmenopausal hormone use and serum uric acid levels in US women--the Third National Health and Nutrition Examination Survey. *Arthritis Res Ther* 2008;**10**(5):R116
57. Mumford SL, Dasharathy SS, Pollack AZ, et al. Serum uric acid in relation to endogenous reproductive hormones during the menstrual cycle: findings from the BioCycle study. *Hum Reprod* 2013;**28**(7):1853-62
58. Oikonen M, Wendelin-Saarenhovi M, Lyytikainen LP, et al. Associations between serum uric acid and markers of subclinical atherosclerosis in young adults. The cardiovascular risk in Young Finns study. *Atherosclerosis* 2012;**223**(2):497-503
59. Celermajer DS, Sorensen KE, Spiegelhalter DJ, et al. Aging is associated with endothelial dysfunction in healthy men years before the age-related decline in women. *J Am Coll Cardiol* 1994;**24**(2):471-6
60. Taddei S, Virdis A, Ghiadoni L, et al. Menopause is associated with endothelial dysfunction in women. *Hypertension* 1996;**28**(4):576-82

1  
2  
3  
4  
5  
6  
7  
8  
9  
10  
11  
12  
13  
14  
15  
16  
17  
18  
19  
20  
21  
22  
23  
24  
25  
26  
27  
28  
29  
0  
3  
2  
3  
3  
5  
6  
3  
8  
9  
40  
41  
42  
43  
44  
45  
46  
47  
48  
49  
0  
5  
2  
3  
5  
6  
3  
8  
9  
60

**Figure legends**

Figure 1. Bar graphs show flow-mediated vasodilation in women categorized according to serum uric acid level.

For peer review only



## Hyperuricemia is Independently Associated with Endothelial Dysfunction in Postmenopausal Women but not in Premenopausal Women

Brief title: Hyperuricemia and endothelial function in women

Tatsuya Maruhashi, MD;<sup>1</sup> Ayumu Nakashima, MD, PhD;<sup>2</sup> Junko Soga MD, PhD;<sup>1</sup> Noritaka Fujimura, MD, PhD;<sup>1</sup> Naomi Idei, MD, PhD;<sup>1</sup> Shinsuke Mikami, MD;<sup>1</sup> Yumiko Iwamoto, MD;<sup>1</sup> Masato Kajikawa, MD;<sup>1</sup> Takeshi Matsumoto, MD;<sup>1</sup> Takayuki Hidaka, MD, PhD;<sup>1</sup> Yasuki Kihara, MD, PhD;<sup>1</sup> Kazuaki Chayama, MD, PhD;<sup>3</sup> Chikara Goto, PhD;<sup>4</sup> Kensuke Noma, MD, PhD;<sup>5</sup> Hirofumi Tomiyama, MD, PhD, FAHA;<sup>6</sup> Bonpei Takase, MD, PhD, FAHA;<sup>7</sup> Akira Yamashina, MD, PhD;<sup>6</sup> Yukihiro Higashi, MD, PhD, FAHA<sup>2,5</sup>

<sup>1</sup>Department of Cardiovascular Medicine, Hiroshima University Graduate School of Biomedical Sciences, Hiroshima, Japan

<sup>2</sup>Division of Regeneration and Medicine, Hiroshima University Hospital, Hiroshima, Japan

<sup>3</sup>Department of Medicine and Molecular Science, Hiroshima University Graduate School of Biomedical Sciences, Hiroshima, Japan

<sup>4</sup>Hiroshima International University, Hiroshima, Japan

<sup>5</sup>Department of Cardiovascular Regeneration and Medicine, Research Institute for Radiation Biology and Medicine, Hiroshima University, Hiroshima, Japan

<sup>6</sup>The Second Department of Internal Medicine, Tokyo Medical University, Tokyo, Japan

<sup>7</sup>Division of Biomedical Engineering, National Defense Medical College Research Institute, Tokorozawa, Japan

Address for corresponding: Yukihiro Higashi, MD, PhD, FAHA

Professor and Chair

Department of Cardiovascular Regeneration and Medicine,  
Research Institute for Radiation Biology and Medicine (RIRBM),  
Hiroshima University

1-2-3 Kasumi, Minami-ku, Hiroshima 734-8553, Japan

Fax: +81-82-257-5831, Phone: +81-82-257-5831

E-mail: [yhigashi@hiroshima-u.ac.jp](mailto:yhigashi@hiroshima-u.ac.jp)

Key words: uric acid, endothelial function, flow-mediated vasodilation, menopause

1  
2  
3  
4  
5  
6  
7  
8  
9  
10  
11  
12  
13  
14  
15  
16  
17  
18  
19  
20  
21  
22  
23  
24  
25  
26  
27  
28  
29  
0  
3  
2  
3  
3  
5  
6  
3  
8  
9  
40  
41  
42  
43  
44  
45  
46  
47  
48  
49  
0  
5  
2  
3  
5  
5  
6  
3  
8  
9  
60

Word count: 3612 words

For peer review only

## Abstract

**Objectives:** The purpose of this study was to determine the relationships between uric acid, endothelial function, and cardiovascular risk factors and to investigate whether menopausal status was associated with the relationship between uric acid and endothelial function in women.

**Design:** Cross-sectional study.

**Setting:** Three general hospitals in Japan.

**Participants:** 749 Japanese women aged 30 to 74 years recruited from people who underwent health-screening examinations with agreement for measurement of vascular function.

**Measures:** We measured serum concentrations of uric acid and flow-mediated vasodilation (FMD). Percent of FMD (Peak diameter-Baseline diameter/Baseline diameter) was used for analysis. Endothelial dysfunction was defined as FMD equal to or less than 4.90%, division point for the lowest tertile and the middle tertile of FMD. Menopause women were defined as subjects without menstruation for over 1 year or subjects with a history of hysterectomy or bilateral oophorectomy.

**Results:** Of the 749 subjects, 368 (49.1%) were premenopausal and 381 (50.9%) were postmenopausal women. Age, body mass index, systolic blood pressure, total cholesterol, triglycerides, glucose, estimated glomerular filtration, and Framingham risk score were significantly correlated with serum uric acid level. FMD showed a gradual decrease in accordance with the serum uric acid level in the entire study population (<4.0 mg/dL, 6.85±3.65%; 4.0 to <5.0 mg/dL, 6.79±3.60%; 5.0 to <6.0 mg/dL, 6.24±3.58%; ≥6.0 mg/dL, 5.27±3.18%; P=0.01). Multivariate analysis revealed that uric acid was a significantly independent risk factor for endothelial dysfunction in postmenopausal women (odds ratio; 1.23, 95% confidence interval; 1.01-1.50), but not

1  
2  
3  
4  
5 in premenopausal women.

6  
7 **Conclusions:** These findings suggest that uric acid can be used as a risk marker of  
8  
9 endothelial dysfunction in a female population, and particularly as an independent risk  
10  
11 factor in postmenopausal women but not in premenopausal women.  
12

13  
14  
15 **Registration number of the study:** UMIN000003409  
16  
17  
18  
19  
20  
21  
22  
23  
24  
25  
26  
27  
28  
29  
30  
31  
32  
33  
34  
35  
36  
37  
38  
39  
40  
41  
42  
43  
44  
45  
46  
47  
48  
49  
50  
51  
52  
53  
54  
55  
56  
57  
58  
59  
60

## Article summary

### Article focus:

- To investigate the relationships between uric acid, endothelial function assessed by flow-mediated vasodilation (FMD), and cardiovascular risk factors in women.
- To examine whether menopausal status is associated with the relationship between uric acid and endothelial function in women.

### Key messages

- Uric acid level was significantly associated with cardiovascular parameters and prevalence of cardiovascular risk factors **in the entire study population**.
- FMD showed a gradual decrease in accordance with the serum uric acid level **in the entire study population**.
- Uric acid was an independent risk factor for endothelial dysfunction even after adjustment for other cardiovascular risk factors in postmenopausal women, but not in premenopausal women.

### Strengths and limitations of this study

- This study includes a large number of women who underwent flow-mediated vasodilation test.
- This study shows a difference in the relationship between uric acid and endothelial dysfunction depending on menopausal status in women.
- Residual confounding may exist for this cross-sectional study.
- Menopausal status was based on self-report.

## Introduction

Several epidemiological studies have shown a relationship between serum uric acid level and subsequent cardiovascular disease.[1-10] In addition, increase in uric acid level is regarded as an independent marker of increased cardiovascular risk. However, it has remained controversial whether uric acid per se should be considered as a cardiovascular risk factor because of the difficulty in investigating the role of uric acid alone in the pathogenesis, development, and maintenance of atherosclerosis. There are significant relationships between elevated uric acid levels and established cardiovascular risk factors, such as hypertension,[11] metabolic syndrome[12] and kidney disease,[13] all of which are also well known as strong predictors of cardiovascular disease.[14 15] Some investigators have argued that elevated uric acid is not an independent risk factor but rather merely a marker of risk for cardiovascular disease.<sup>1,6,7</sup> However, recent epidemiological studies have demonstrated that uric acid is an independent risk factor for cardiovascular disease.[5 7-10] Although the mechanism by which uric acid causes cardiovascular disease is not fully understood, several lines of evidence suggest that elevated uric acid impairs endothelial function by inducing intracellular oxidative stress and inflammation through activation of the local renin-angiotensin system, particularly angiotensin II, and the pro-oxidant effect of uric acid per se, once absorbed into endothelial cells.[16-18]

Endothelial dysfunction is established in the initial step of atherosclerosis and plays an important role in the development of atherosclerotic conditions, leading to cardiovascular outcomes.[19] Recently, measurement of flow-mediated vasodilation (FMD) as an index of endothelium-dependent vasodilation has been widely used as a method for assessing endothelial function.[20-24] In addition, growing evidence has shown that endothelial function assessed by FMD can serve as an independent predictor

1  
2  
3  
4 of cardiovascular events.[25-28] Recently, several investigators, including us, have  
5  
6 shown a relationship between uric acid and endothelial function assessed by  
7  
8 FMD.[29-34] As for the relationship between uric acid and FMD in men, previous  
9  
10 studies are consistent in demonstrating that uric acid is a significant independent risk  
11  
12 factor for FMD.[29 34] However, there is little information on whether uric acid is an  
13  
14 independent risk factor for endothelial dysfunction in women. In addition, it remains  
15  
16 unclear whether menopausal status is associated with the relationship between uric acid  
17  
18 and endothelial function. It is clinically important to confirm the role of uric acid per se  
19  
20 in atherosclerosis. We therefore investigated the relationships between uric acid, FMD  
21  
22 and cardiovascular risk factors and whether menopausal status was associated with the  
23  
24 relationship between uric acid and endothelial function in women who underwent  
25  
26 health-screening examinations.  
27  
28  
29

## 3 4 5 6 7 8 9 10 11 12 13 14 15 16 17 18 19 20 21 22 23 24 25 26 27 28 29 30 31 32 33 34 35 36 37 38 39 40 41 42 43 44 45 46 47 48 49 50 51 52 53 54 55 56 57 58 59 60

### Methods

#### Subjects

A total of 5321 Japanese adults aged 17 to 86 years who underwent health-screening examinations with agreement for measurement of vascular function were enrolled in the Flow-mediated Dilation Japan Registry between 1 April 2010 and 31 August 2012 at 3 general hospitals in Japan. All employees have an obligation to undergo health screening every year under the regulations of the Society-managed Health Insurance Union in Japan. In accordance with the regulations, we performed health-screening examinations. From the registry, 895 women aged 30 to 74 years were recruited for this study. Among the 895 subjects, information on serum uric acid levels, menopause, and phases of menstrual was available for 797 subjects. Subjects during menstruation (n=28), subjects receiving hormone replacement therapy (n=3), one subject who was

1  
2  
3  
4 pregnant, subjects who had been previously diagnosed with cardiovascular diseases  
5  
6 (n=15), and one subject who was being treated with an antihyperuricemic drug were  
7  
8 excluded. Finally, 749 women without cardiovascular diseases were enrolled in this  
9  
10 study. Hypertension was defined as systolic blood pressure of  $\geq 140$  mm Hg or diastolic  
11  
12 blood pressure of  $\geq 90$  mm Hg, in a sitting position, on at least 3 different occasions.  
13  
14 [35] Patients with secondary forms of hypertension were excluded in all patients with  
15  
16 hypertension on the basis of complete history; physical examination; radiological and  
17  
18 ultrasound examinations; urinalysis; plasma rennin activity; plasma aldosterone and  
19  
20 norepinephrine concentrations; serum creatinine, potassium, calcium, and free throxine  
21  
22 concentrations; and 24-hour urinary excretion of 17-hydroxycorticosteroids,  
23  
24 17-ketogenic steroids, and vanillylmandelic acid. Diabetes was defined according to the  
25  
26 American Diabetes Association.[36] Dyslipidemia was defined according to the third  
27  
28 report of the National Cholesterol Education Program (NCEP) Expert Panel on  
29  
30 Detection, Evaluation, and Treatment of High Blood Cholesterol in Adults  
31  
32 (ATP-III).[37] We defined smokers as those who were current smokers. Measurement of  
33  
34 FMD was performed without withholding medications. Framingham risk score was  
35  
36 calculated by points of risk factors: age, total cholesterol level, high-density lipoprotein  
37  
38 cholesterol level, systolic blood pressure, and smoking status.[38] Diagnosis of  
39  
40 metabolic syndrome was made according to the criteria of NCEP ATP-III.[37] Thus,  
41  
42 metabolic syndrome was diagnosed when 3 or more of the following risk determinants  
43  
44 were present. (1) waist circumference of  $\geq 88$  cm, (2) triglyceride  $\geq 1.7$  mmol/L (150  
45  
46 mg/dL), (3) high-density lipoprotein cholesterol  $< 1.29$  mmol/L (50 mg/dL), (4) blood  
47  
48 pressure  $\geq 130$  and/or 85 mm Hg, or (5) fasting blood glucose  $\geq 6.11$  mmol/L (110  
49  
50 mg/dL). The estimated glomerular filtration rate (eGFR) was calculated using the  
51  
52 Japanese eGER equation.[39] Chronic kidney disease (CKD) was defined as eGFR  $< 60$   
53  
54  
55  
56  
57  
58  
59  
60



1  
2  
3  
4 mL/min/1.73 m<sup>2</sup>.<sup>[40]</sup> Menopause women were defined as subjects without menstruation  
5  
6 for over 1 year or subjects with a history of hysterectomy or bilateral oophrectomy.<sup>[41]</sup>  
7  
8 The ethical committees of our institutions approved the study protocol. Written  
9  
10 informed consent for participation in the study was obtained from all subjects.  
11  
12

### 13 14 15 **Study protocol**

16  
17 We measured vascular responses to reactive hyperemia in the brachial artery in all  
18  
19 subjects. Subjects fasted the previous night for at least 12 hours. The study began at 8:30  
20  
21 AM. The subjects were kept in the supine position in a quiet, dark, air-conditioned room  
22  
23 (constant temperature of 22°C to 25°C) throughout the study. After remaining in the  
24  
25 supine position for 30 minutes, blood samples were obtained for measurement of basal  
26  
27 fasting serum concentrations of total cholesterol, triglycerides, high-density lipoprotein  
28  
29 cholesterol, low-density lipoprotein cholesterol, creatinine, glucose, and uric acid. Then  
30  
31 FMD was measured. The observers were blind to the form of examination. Serum uric  
32  
33 acid levels were measured by the uricase-peroxidase method (JCA-BM6010; JEOL Ltd.,  
34  
35 Tokyo, Japan). Levels of serum total cholesterol, triglycerides, high-density lipoprotein  
36  
37 cholesterol, low-density lipoprotein cholesterol, and creatinine were enzymatically  
38  
39 measured (JCA-BM6010; JEOL Ltd., Tokyo, Japan). Glucose levels were measured by  
40  
41 the glucose oxidase immobilized oxygen electrode method (GA08II; A&T, Yokohama,  
42  
43 Japan).  
44  
45  
46  
47  
48  
49

### 50 51 **Measurement of FMD**

52  
53 The subjects remained supine throughout the study. The vascular response to reactive  
54  
55 hyperemia in the brachial artery was used for assessment of endothelium-dependent  
56  
57 FMD. A high-resolution linear artery transducer was coupled to computer-assisted  
58  
59  
60

1  
2  
3  
4 analysis software (UNEXEF18G, UNEX Co., Nagoya, Japan) that used an automated  
5 edge detection system for measurement of brachial artery diameter. A blood pressure  
6 cuff was placed around the forearm. The brachial artery was scanned longitudinally 5 to  
7  
8  
9  
10  
11 10 cm above the elbow. When the clearest B-mode image of the anterior and posterior  
12 intimal interfaces between the lumen and vessel wall was obtained, the transducer was  
13 held at the same point throughout the scan by a special probe holder (UNEX Co.) to  
14 ensure consistency of the image. Depth and gain setting were set to optimize the images  
15 of the arterial lumen wall interface. When the tracking gate was placed on the intima,  
16 the artery diameter was automatically tracked, and the waveform of diameter changes  
17 over the cardiac cycle was displayed in real time using the FMD mode of the tracking  
18 system. This allowed the ultrasound images to be optimized at the start of the scan and  
19 the transducer position to be adjusted immediately for optimal tracking performance  
20 throughout the scan. Pulsed Doppler flow was assessed at baseline and during peak  
21 hyperemic flow, which was confirmed to occur within 15 seconds after cuff deflation.  
22 Blood flow velocity was calculated from the Doppler data and was displayed as a  
23 waveform in real time. The baseline longitudinal image of the artery was acquired for  
24 30 seconds, and then the blood pressure cuff was inflated to 50 mm Hg above systolic  
25 pressure for 5 minutes. The longitudinal image of the artery was recorded continuously  
26 until 5 minutes after cuff deflation. Pulsed Doppler velocity signals were obtained for  
27 20 seconds at baseline and for 10 seconds immediately after cuff deflation. Changes in  
28 brachial artery diameter were immediately expressed as percentage change relative to  
29 the vessel diameter before cuff inflation. FMD was automatically calculated as the  
30 percentage change in peak vessel diameter from the baseline value. Percentage of FMD  
31 (peak diameter-baseline diameter/baseline diameter) was used for analysis. Blood flow  
32 volume was calculated by multiplying the Doppler flow velocity (corrected for the  
33  
34  
35  
36  
37  
38  
39  
40  
41  
42  
43  
44  
45  
46  
47  
48  
49  
50  
51  
52  
53  
54  
55  
56  
57  
58  
59  
60

1  
2  
3  
4 angle) by heart rate and vessel cross-sectional area ( $-r^2$ ). Reactive hyperemia was  
5  
6 calculated as the maximum percentage increase in flow after cuff deflation compared  
7  
8 with baseline flow.  
9

### 10 11 12 13 **Statistical analysis**

14  
15 Results are presented as mean $\pm$ SD. All reported probability values were 2-sided, and a  
16  
17 probability value of  $<0.05$  was considered statistically significant. Categorical variables  
18  
19 were compared by means of chi-square test. Comparisons between the groups  
20  
21 categorized according to serum uric acid level were carried out using P for trend  
22  
23 analysis with Bonferroni's test for post-hoc comparisons. Relations between variables  
24  
25 were determined by Spearman correlation coefficients analysis. Stepwise multivariate  
26  
27 logistic regression analyses were performed to identify factors associated with  
28  
29 endothelial dysfunction among potential confounders ( $P<0.20$ ) in univariate analysis.  
30  
31 Using variables associated with endothelial dysfunction in stepwise multiple regression  
32  
33 analyses, we performed the final logistic regression analyses for which results are  
34  
35 presented in the results section. The data were processed using the software package  
36  
37 Stata version 9 (Stata Co., College Station, Texas, USA).  
38  
39  
40  
41  
42  
43  
44  
45

## 46 47 48 **Results**

### 49 50 51 **Baseline clinical characteristics**

52  
53 The baseline clinical characteristics are summarized in Table 1. Of the 749 subjects, 112  
54  
55 (15.0%) had hypertension, 262 (35.0%) had dyslipidemia, 34 (4.5%) had diabetes  
56  
57 mellitus, 59 (7.9%) were current smokers, 65 (8.7%) had metabolic syndrome, and 56  
58  
59 (8.4%) had chronic kidney disease. Mean Framingham risk score was  $3.94\pm 3.62\%$ . The  
60  
61 mean value of serum uric acid level was  $4.44\pm 1.09$  mg/dL (median, 4.30 mg/dL;  
62

interquartile range, 3.80-5.00 mg/dL; range, 0.80 to 10.0 mg/dL). The mean value of FMD was  $6.59 \pm 3.60\%$  (range, -4.70 to 20.1%). Division point for the lowest tertile and the middle tertile of FMD was 4.90%. Therefore, endothelial dysfunction was defined as FMD equal or less than 4.90%.

### Relationships between serum uric acid level and cardiovascular risk factors

Univariate regression analysis revealed that serum uric acid level significantly correlated with age ( $r=0.21$ ,  $P<0.001$ ), body mass index ( $r=0.26$ ,  $P<0.001$ ), systolic blood pressure ( $r=0.17$ ,  $P<0.001$ ), diastolic blood pressure ( $r=0.17$ ,  $P<0.001$ ), total cholesterol ( $r=0.23$ ,  $P<0.001$ ), triglycerides ( $r=0.25$ ,  $P<0.001$ ), high-density lipoprotein cholesterol ( $r=-0.13$ ,  $P=0.002$ ), low-density lipoprotein cholesterol ( $r=0.22$ ,  $P<0.001$ ), glucose ( $r=0.12$ ,  $P=0.004$ ), and eGFR ( $r=-0.27$ ,  $P<0.001$ ). Subjects were categorized according to serum uric acid levels (Table 2). Age, body mass index, systolic blood pressure, total cholesterol, triglycerides, glucose, and Framingham risk score were significantly increased and eGFR was significantly decreased with increase in serum uric acid level. As for the prevalence of cardiovascular risk factors, there were significant increases in the prevalence of hypertension, dyslipidemia, current smoking, metabolic syndrome, chronic kidney disease, and menopause in relation to increase in serum uric acid level.

### Relationships between serum uric acid level and FMD

Subjects were categorized into 4 groups on the basis of serum uric acid level. FMD was significantly decreased with increase in serum uric acid level ( $<4.0$  mg/dL,  $6.85 \pm 3.65\%$ ;  $4.0$  to  $<5.0$  mg/dL,  $6.79 \pm 3.60\%$ ;  $5.0$  to  $<6.0$  mg/dL,  $6.24 \pm 3.58\%$ ;  $\geq 6.0$  mg/dL,  $5.27 \pm 3.18\%$ ;  $P$  for trend = 0.01, Figure 1). Multiple logistic regression analysis revealed

1  
2  
3  
4  
5 that serum uric acid level was significantly associated with endothelial dysfunction after  
6 adjustment for age (odds ratio, 1.20; 95% confident interval [CI], 1.03 to 1.39) (Table 3).  
7  
8 However, after adjustment for other risk factors, including **high-density lipoprotein**  
9 **cholesterol, glucose, and smoking status**, the significant association between serum uric  
10 acid level and endothelial dysfunction disappeared (**odds ratio, 1.13; 95% CI, 0.97 to**  
11 **1.32**).  
12  
13  
14  
15  
16  
17  
18  
19

### 20 **Difference in the relationship between serum uric acid level and endothelial** 21 **dysfunction according to menopausal status**

22  
23  
24 Subjects were divided into two groups according to menopausal status to investigate the  
25 influence of menopause on the relationship between serum uric acid level and  
26 endothelial function (supplemental Table I). Of the 749 subjects, 368 (49.1%) were  
27 premenopausal and 381 (50.9%) were postmenopausal women. Postmenopausal women  
28 were significantly older than premenopausal women (58.6±6.3 vs. 41.5±6.1 years,  
29 P<0.001). The ages ranged from 30 to 54 years in premenopausal women and 31 to 74  
30 years in postmenopausal women. Serum uric acid level was significantly higher in  
31 postmenopausal women than in premenopausal women (4.64±1.11 vs. 4.24±1.03 mg/dL,  
32 P<0.001). FMD was significantly impaired in postmenopausal women compared to that  
33 in premenopausal women (5.51±3.14 vs. 7.77±3.71%, P<0.001), and the prevalence of  
34 endothelial dysfunction was significantly higher in postmenopausal women than  
35 premenopausal women (66.4% vs. 34.0%, P<0.001). In postmenopausal women,  
36 multiple logistic regression analysis revealed that serum uric acid level was significantly  
37 associated with endothelial dysfunction after adjustment for age (odds ratio, 1.26; 95%  
38 CI, 1.05 to 1.53) (Table 4). The significant association between serum uric acid level  
39 and endothelial dysfunction persisted after adjustment for other risk factors (**odds ratio,**  
40  
41  
42  
43  
44  
45  
46  
47  
48  
49  
50  
51  
52  
53  
54  
55  
56  
57  
58  
59  
60

1  
2  
3  
4 1.23; 95% CI, 1.01 to 1.50). In contrast, there was no significant association between  
5  
6 serum uric acid level and endothelial dysfunction in premenopausal women (odds ratio,  
7  
8 1.14; 95% CI, 0.90 to 1.44) (Table 4). After adjustment for other risk parameters, the  
9  
10 association between uric acid level and endothelial dysfunction remained insignificant  
11  
12 (odds ratio, 0.98; 95% CI, 0.75 to 1.26).  
13  
14  
15

### 16 17 18 Discussion

19  
20 In the present study, we demonstrated that uric acid level was significantly associated  
21  
22 with cardiovascular parameters and prevalence of cardiovascular risk factors. Although  
23  
24 FMD showed a graded decrease according to serum uric acid level, uric acid was not an  
25  
26 independent risk factor for endothelial dysfunction after adjustment for other  
27  
28 cardiovascular risk parameters. However, when subjects were divided into two groups  
29  
30 according to menopausal status, uric acid was a significantly independent risk factor for  
31  
32 endothelial dysfunction even after adjustment for other cardiovascular risk parameters  
33  
34 in postmenopausal women, but not in premenopausal women. To our knowledge, this is  
35  
36 the first report showing a difference in the relationship between uric acid and  
37  
38 endothelial dysfunction depending on menopausal status in women.  
39  
40

41  
42 As a marker of atherosclerotic diseases, it has been demonstrated that serum uric  
43  
44 acid level is associated with cardiovascular risk factors and subclinical atherosclerosis,  
45  
46 such as hypertension,[11] metabolic syndrome,[12] kidney disease,[13] coronary artery  
47  
48 calcification,[42] and carotid atherosclerosis.[43] In the present study, we confirmed  
49  
50 that serum uric acid level was significantly associated with age, body mass index,  
51  
52 systolic blood pressure, total cholesterol, triglycerides, glucose, and eGFR, most of  
53  
54 which are components of metabolic syndrome and CKD. Indeed, the prevalence of  
55  
56 hypertension, dyslipidemia, metabolic syndrome, and CKD was linearly increased in  
57  
58  
59  
60

1  
2  
3  
4 relation to increase in serum uric acid level. An association between uric acid and  
5 metabolic syndrome has been demonstrated by the fact that uric acid level is often  
6 elevated in subjects with metabolic syndrome and that the prevalence of metabolic  
7 syndrome linearly increases in relation to uric acid level.[12 43] The mechanism behind  
8 the association between increase in serum uric acid level and metabolic syndrome is  
9 thought to be hyperinsulinemia, mediated by insulin resistance and visceral adiposity,  
10 leading to an increase in uric acid absorption in renal tubules.[44] Uric acid levels are  
11 also frequently elevated in patients with kidney disease as a result of reduction in GFR  
12 and renal urate excretion.[45] In addition, several epidemiological studies have shown a  
13 link between elevated serum uric acid level and subsequent cardiovascular events.[1-10]  
14 The association between serum uric acid level and cardiovascular disease has been  
15 reported to be generally stronger in women than in men.[9 46-48] These findings  
16 suggest that uric acid level is a biochemical marker of atherosclerotic disease and a  
17 useful predictor of the development of cardiovascular diseases.

18  
19  
20  
21  
22  
23  
24  
25  
26  
27  
28  
29  
30  
31  
32  
33  
34  
35  
36  
37  
38  
39  
40  
41  
42  
43  
44  
45  
46  
47  
48  
49  
50  
51  
52  
53  
54  
55  
56  
57  
58  
59  
60

Despite the association between elevated uric acid level and cardiovascular conditions, uric acid has not been established as an independent causal risk factor for cardiovascular disease because of the link between uric acid and established cardiovascular risk factors. Another possible explanation for the difficulty in determining the role of uric acid in cardiovascular disease is that uric acid may function as an powerful antioxidant and as a scavenger of singlet oxygen and radicals.[49 50] In patients with cardiovascular disease, an increase in uric acid level, therefore, might be considered as a compensatory mechanism to counteract the oxidative stress induced in these conditions. Although it remains controversial whether uric acid is a causative factor or merely a marker of cardiovascular disease, some epidemiological studies have demonstrated that the association between uric acid and cardiovascular disease remains

1  
2  
3  
4  
5  
6  
7  
8  
9  
10  
11  
12  
13  
14  
15  
16  
17  
18  
19  
20  
21  
22  
23  
24  
25  
26  
27  
28  
29  
30  
31  
32  
33  
34  
35  
36  
37  
38  
39  
40  
41  
42  
43  
44  
45  
46  
47  
48  
49  
50  
51  
52  
53  
54  
55  
56  
57  
58  
59  
60

significant even after adjustment for concomitant risk factors, suggesting that uric acid per se is an independent risk factor for cardiovascular disease.[5 7-10]

Although the precise mechanism behind the relationship between uric acid and cardiovascular disease remains to be elucidated, growing evidence indicates that endothelial dysfunction induced by uric acid plays an important role in the development of cardiovascular disease.[45] Several lines of evidence suggest that uric acid also has proinflammatory effects on endothelial cells, leading to reduction of endothelial nitric oxide bioavailability and consequent endothelial dysfunction.[17 18] Yu et al.[18] demonstrated that uric acid enhances the production of reactive oxygen species by activation of the local renin-angiotensin system, particularly angiotensin II, in human endothelial vascular cells and that probenecid, an inhibitor of urate transporter, inhibits uric acid-induced oxidative stress. Thus, uric acid is thought to mediate endothelial dysfunction by generating oxidative stress once absorbed into endothelial cells. In a clinical setting, measurement of FMD as an index of endothelium-dependent vasodilation in the brachial artery using high-resolution ultrasound has been widely used as a method for assessing vascular function.[20-23] Although several investigators have shown that uric acid inversely correlates with FMD and that uric acid is an independent predictor of FMD, the subjects in those studies were limited to a small number of subjects or highly selected subjects, such as patients with increased cardiovascular risk,[30] hyperuricemia,[32] or nondiabetic CKD.[33] In addition, uric acid has been shown to be a significantly independent risk factor for endothelial dysfunction in men in an analysis of a large population,[34] but there is little information on the relationship between uric acid and FMD in women. As a risk marker, we demonstrated that serum uric acid level was significantly associated with FMD in women. FMD was significantly impaired with increase in serum uric acid level. FMD is



1  
2  
3  
4  
5 known to be impaired as a consequence of cumulative cardiovascular risk factors.[21  
6  
7 51] Therefore, significant decrease in FMD according to serum uric acid level may  
8  
9 reflect significant associations between uric acid and other cardiovascular risk factors,  
10  
11 including hypertension, dyslipidemia, metabolic syndrome, and CKD, as a risk marker  
12  
13 for cardiovascular disease in women. These findings provide a rationale for the  
14  
15 relationships of uric acid with cardiovascular disease and mortality being generally  
16  
17 strong in women.  
18

19  
20 As for the role of uric acid as a causal risk factor in endothelial function,  
21  
22 multivariate analysis performed for the entire population indicated that uric acid was not  
23  
24 an independent predictor of endothelial dysfunction after adjustment for other risk  
25  
26 factors. However, when subjects were divided into two groups according to menopausal  
27  
28 status, multivariate analyses revealed that uric acid was a significantly independent risk  
29  
30 factor for endothelial dysfunction in postmenopausal women but not in premenopausal  
31  
32 women. The incidence of cardiovascular diseases in women is lower than that in men  
33  
34 until around the age of menopause, after which it markedly increases and becomes equal  
35  
36 to that of their male counterparts, suggesting a protective effect of endogenous ovarian  
37  
38 hormones on atherosclerosis.[52] Ovarian hormones, especially estradiol, have been  
39  
40 suggested to have protective effects on endothelial function.[53 54] In addition to its  
41  
42 protective effect on endothelial function, estradiol has been shown to lower uric acid  
43  
44 level through mechanisms involving renal clearance, secretion and reabsorption.[55-57]  
45  
46 Therefore, endogenous estradiol may preserve endothelial function and lower serum  
47  
48 uric acid level regardless of the presence or absence of cardiovascular risk factors,  
49  
50 resulting in the weak relationship between uric acid and endothelial dysfunction in  
51  
52 premenopausal women. Our findings in the analysis of premenopausal women are  
53  
54 consistent with the results of a previous study demonstrating that uric acid was not an  
55  
56  
57  
58  
59  
60

1  
2  
3  
4 independent risk factor of FMD in young women aged 30 to 45 years.[58] In contrast to  
5 premenopausal women, uric acid remained a significantly independent risk for  
6 endothelial dysfunction even after adjustment for other risk factors in postmenopausal  
7 women. Although Maxwell et al.[29] reported that uric acid was not an independent  
8 determinant of FMD in women, the non-independent association between FMD and uric  
9 acid observed in their study may be, in part, attributed to inclusion of entire women in  
10 the analysis for the relationship between FMD and uric acid without taking into account  
11 menopausal status. The increased cardiovascular risk in postmenopausal women has  
12 been suggested to be associated with impairment of endothelial function after  
13 menopause.[59 60] There is a possibility that treatment of hyperuricemia in  
14 postmenopausal women will improve endothelial function, leading to a decrease in  
15 cardiovascular events.  
16  
17  
18  
19  
20  
21  
22  
23  
24  
25  
26  
27  
28  
29

0  
1 There were some limitations in this study. The cross-sectional design did not  
2 allow us to establish a definitive causal relationship between hyperuricemia and  
3 endothelial dysfunction. In addition, multiple factors, such as vitamins, phosphate and  
4 statin use, that are known to influence FMD and residual unrecognized confounding  
5 factors were not taken into account in this study. Future prospective and interventional  
6 studies are certainly warranted to obtain more specific conclusions as to whether  
7 hyperuricemia should be treated, which subgroup should be treated, and whether  
8 treatment of hyperuricemia improves endothelial function with subsequent decrease in  
9 cardiovascular events.  
10  
11  
12  
13  
14  
15  
16  
17  
18  
19  
20  
21  
22  
23  
24  
25  
26  
27  
28  
29

0  
1 In conclusion, uric acid is a useful marker for endothelial function in women.  
2 Significant relationships between serum uric acid level and cardiovascular risk factors,  
3 including hypertension, dyslipidemia, metabolic syndrome, and CKD, may result in the  
4 significant association between FMD and serum uric acid level, as a risk marker of  
5  
6  
7  
8  
9  
10

1  
2  
3  
4 atherosclerotic diseases. Uric acid, as a causal cardiovascular risk factor, may be an  
5  
6 independent risk for endothelial dysfunction in postmenopausal women but not in  
7  
8 premenopausal women. Further studies are needed to investigate whether treatment for  
9  
10 hyperuricemia improves endothelial function in postmenopausal women.  
11  
12  
13  
14  
15  
16  
17  
18  
19  
20  
21  
22  
23  
24  
25  
26  
27  
28  
29  
30  
31  
32  
33  
34  
35  
36  
37  
38  
39  
40  
41  
42  
43  
44  
45  
46  
47  
48  
49  
50  
51  
52  
53  
54  
55  
56  
57  
58  
59  
60

Table 1. Clinical Characteristics of the Subjects

| Variables                             | Total<br>(n=749) |
|---------------------------------------|------------------|
| Age, y                                | 50.2±10.6        |
| Body mass index, kg/m <sup>2</sup>    | 22.0±3.4         |
| Systolic blood pressure, mm Hg        | 121.1±19.0       |
| Diastolic blood pressure, mm Hg       | 73.9±12.4        |
| Heart rate, bpm                       | 64.4±10.2        |
| Total cholesterol, mmol/L             | 5.37±0.88        |
| Triglycerides, mmol/L                 | 1.07±0.71        |
| HDL-cholesterol, mmol/L               | 1.80±0.42        |
| LDL-cholesterol, mmol/L               | 3.11±0.77        |
| Glucose, mmol/L                       | 5.32±1.47        |
| Uric acid, mg/dL                      | 4.44±1.09        |
| eGFR, mL/min/1.73 m <sup>2</sup>      | 77.1±13.3        |
| Framingham risk score, %              | 3.94±3.62        |
| Hypertension, n (%)                   | 112 (15.0)       |
| Dyslipidemia, n (%)                   | 262 (35.0)       |
| Diabetes mellitus, n (%)              | 34 (4.5)         |
| Smoking, n (%)                        | 59 (7.9)         |
| Metabolic syndrome, n (%)             | 65 (8.7)         |
| Chronic kidney disease, n (%)         | 56 (8.4)         |
| Menopause, n (%)                      | 381 (50.9)       |
| Flow-mediated vasodilation, %         | 6.59±3.60        |
| Baseline brachial artery diameter, mm | 3.40±0.47        |

HDL indicates high-density lipoprotein; LDL, low-density lipoprotein; eGFR, estimated glomerular filtration rate.

Table 2. Clinical Characteristics according to Serum Uric Acid Levels \*†§

| Variables                             | Uric acid categories, mg/dL |                        |                        |                | P value |
|---------------------------------------|-----------------------------|------------------------|------------------------|----------------|---------|
|                                       | <4.0<br>(n=245)             | 4.0 to <5.0<br>(n=302) | 5.0 to <6.0<br>(n=144) | 6.0≤<br>(n=58) |         |
| Uric acid, mg/dL                      | 3.38±0.54                   | 4.42±0.28              | 5.33±0.26              | 6.90±0.90      |         |
| Age, y                                | 48.3±10.9                   | 49.4±10.1              | 53.5±9.9*†             | 54.7±10.0*†    | <0.001  |
| Body mass index, kg/m <sup>2</sup>    | 20.8±2.8                    | 22.0±3.4*              | 23.0±3.3*†             | 24.2±3.9*†     | <0.001  |
| Systolic blood pressure, mm Hg        | 117.2±17.6                  | 120.4±18.3             | 125.9±20.4*†           | 129.2±20.5*†   | <0.001  |
| Diastolic blood pressure, mm Hg       | 71.5±11.4                   | 73.6±12.1              | 77.4±13.4*†            | 77.0±12.5*     | <0.001  |
| Heart rate, bpm                       | 64.6±9.6                    | 63.5±0.6               | 65.5±12.4              | 65.8±11.1      | 0.14    |
| Total cholesterol, mmol/L             | 5.20±0.82                   | 5.33±0.86              | 5.60±0.91*†            | 5.67±0.88*†    | <0.001  |
| Triglycerides, mmol/L                 | 0.89±0.51                   | 0.97±0.50              | 1.32±0.81*†            | 1.69±1.32*†§   | <0.001  |
| HDL-cholesterol, mmol/L               | 1.83±0.38                   | 1.83±0.41              | 1.69±0.45*†            | 1.69±0.54      | 0.001   |
| LDL-cholesterol, mmol/L               | 3.00±0.70                   | 3.10±0.77              | 3.31±0.80*             | 3.19±0.96      | 0.006   |
| Glucose, mmol/L                       | 5.09±0.84                   | 5.28±1.38              | 5.52±2.00*             | 6.03±2.09*†    | <0.001  |
| eGFR, mL/min/1.73 m <sup>2</sup>      | 80.9±13.7                   | 76.8±12.1*             | 74.4±13.0*             | 67.7±13.8*†§   | <0.001  |
| Flow-mediated vasodilation, %         | 6.85±3.65                   | 6.79±3.60              | 6.24±3.58              | 5.27±3.18*†    | 0.01    |
| Baseline brachial artery diameter, mm | 3.35±0.46                   | 3.40±0.48              | 3.43±0.46              | 3.61±0.51*†    | 0.002   |
| Framingham risk score, %              | 3.27±3.44                   | 3.49±2.98              | 5.08±3.65*†            | 6.33±5.42*†    | <0.001  |
| Hypertension, n (%)                   | 25 (10.2)                   | 34 (11.3)              | 34 (23.6)*†            | 19 (32.8)*†    | <0.001  |
| Dyslipidemia, n (%)                   | 59 (24.1)                   | 90 (29.8)              | 72 (50.0)*†            | 41 (70.7)*†§   | <0.001  |
| Diabetes mellitus, n (%)              | 9 (3.7)                     | 8 (2.7)                | 9 (6.3)                | 8 (13.8)*†     | 0.008   |
| Smoking, n (%)                        | 12 (4.9)                    | 23 (7.6)               | 15 (10.4)              | 9 (15.5)       | 0.04    |
| Metabolic syndrome, n (%)             | 12 (4.9)                    | 18 (6.0)               | 19 (13.2)*             | 16 (28.1)*†    | <0.001  |
| Chronic kidney disease, n (%)         | 10 (4.6)                    | 22 (7.9)               | 14 (10.9)              | 10 (24.4)*†    | 0.001   |
| Menopause, n (%)                      | 103 (42.0)                  | 146 (48.3)             | 91 (63.2)*†            | 41 (70.7)*†    | <0.001  |
| Endothelial dysfunction, n (%)        | 75 (30.6)                   | 87 (28.8)              | 50 (34.7)              | 32 (55.2)*†§   | 0.002   |

HDL indicates high-density lipoprotein; LDL, low-density lipoprotein; eGFR, estimated glomerular filtration rate; P values for comparisons across the uric acid categories were performed with ANOVA for continuous variables and  $\chi^2$  test for categorical variables.

\*P<0.05 vs. serum uric acid level<4.0 mg/dL group, †P<0.05 vs. serum uric acid level 4.0 to <5.0 mg/dL group, §P<0.05 vs. serum uric acid level 5.0 to <6.0 mg/dL group.

Table 3. Multivariate Analysis of the Relation Between Endothelial Dysfunction and Variables

| Model | Variables         | Odds ratio (95%CI)  | P value |
|-------|-------------------|---------------------|---------|
| 1     | Uric acid (mg/dL) | 1.30 (1.13 to 1.50) | <0.001  |
| 2     | 1+age             | 1.20 (1.03 to 1.39) | 0.02    |
| 3     | 2+other variables | 1.13 (0.97 to 1.32) | 0.11    |

Initial factors included in the model 3 were body mass index, systolic blood pressure, total cholesterol, triglycerides, high-density lipoprotein cholesterol, low-density lipoprotein cholesterol, glucose, eGFR, and smoking. Using stepwise multiple regression analysis, we selected high-density lipoprotein cholesterol, glucose, and smoking as independent factors for endothelial dysfunction (other variables).

Table 4. Multivariate Analysis of the Relation Between Endothelial Dysfunction and Variables

| Model | Covariates        | Post-menopausal     |         | Pre-menopausal      |         |
|-------|-------------------|---------------------|---------|---------------------|---------|
|       |                   | Odds ratio (95% CI) | P value | Odds ratio (95% CI) | P value |
| 1     | Uric acid (mg/dL) | 1.27(1.05 to 1.53)  | 0.01    | 1.14 (0.90 to 1.44) | 0.28    |
| 2     | 1+age             | 1.26 (1.05 to 1.53) | 0.02    | 1.12 (0.85 to 1.39) | 0.50    |
| 3     | 2+other variables | 1.23 (1.01 to 1.50) | 0.04    | 0.98 (0.75 to 1.26) | 0.85    |

Other variables: high-density lipoprotein cholesterol, glucose, and smoking.

### Author Contributions

Tatsuya Maruhashi and Yukihiro Higashi, drafting the article and conception of this study; Junko Soga, Noritaka Fujimura, Naomi Idei, Shinsuke Mikami, Yumiko Iwamoto, Masato Kajikawa, Takeshi Matsumoto, Takayuki Hidaka, Chikara Goto, Kensuke Noma, Ayumu Nakashima, Bonpei Takase, and Hirofumi Tomiyama, performing the ultrasonography; Kazuaki Chayama, Yasuki Kihara, Akira Yamashina, revising the article critically for important intellectual content.

### Acknowledgments

We thank Megumi Wakisaka, Miki Kumiji, Kiichiro Kawano and Satoko Michiyama for their excellent secretarial assistance.

### Competing interests

None.

### Funding

This study was supported in part by a Grant-in-Aid for Scientific Research from the Ministry of Education, Science and Culture of Japan (1859081500 and 21590898) and a Grant in Aid of Japanese Arteriosclerosis Prevention Fund.



## References

1. Reunanen A, Takkunen H, Knekt P, et al. Hyperuricemia as a risk factor for cardiovascular mortality. *Acta Med Scand Suppl* 1982;**668**:49-59
2. Levine W, Dyer AR, Shekelle RB, et al. Serum uric acid and 11.5-year mortality of middle-aged women: findings of the Chicago Heart Association Detection Project in Industry. *J Clin Epidemiol* 1989;**42**(3):257-67
3. Wannamethee SG, Shaper AG, Whincup PH. Serum urate and the risk of major coronary heart disease events. *Heart* 1997;**78**(2):147-53
4. Lehto S, Niskanen L, Ronnema T, et al. Serum uric acid is a strong predictor of stroke in patients with non-insulin-dependent diabetes mellitus. *Stroke* 1998;**29**(3):635-9
5. Alderman MH, Cohen H, Madhavan S, et al. Serum uric acid and cardiovascular events in successfully treated hypertensive patients. *Hypertension* 1999;**34**(1):144-50
6. Culeton BF, Larson MG, Kannel WB, et al. Serum uric acid and risk for cardiovascular disease and death: the Framingham Heart Study. *Ann Intern Med* 1999;**131**(1):7-13
7. Moriarty JT, Folsom AR, Iribarren C, et al. Serum uric acid and risk of coronary heart disease: Atherosclerosis Risk in Communities (ARIC) Study. *Ann Epidemiol* 2000;**10**(3):136-43
8. Verdecchia P, Schillaci G, Reboldi G, et al. Relation between serum uric acid and risk of cardiovascular disease in essential hypertension. The PIUMA study. *Hypertension* 2000;**36**(6):1072-8
9. Fang J, Alderman MH. Serum uric acid and cardiovascular mortality the NHANES I epidemiologic follow-up study, 1971-1992. *National Health and Nutrition*

- 1  
2  
3  
4  
5 Examination Survey. *Jama* 2000;**283**(18):2404-10  
6  
7  
8  
9  
10  
11  
12  
13  
14  
15  
16  
17  
18  
19  
20  
21  
22  
23  
24  
25  
26  
27  
28  
29  
30  
31  
32  
33  
34  
35  
36  
37  
38  
39  
40  
41  
42  
43  
44  
45  
46  
47  
48  
49  
50  
51  
52  
53  
54  
55  
56  
57  
58  
59  
60
10. Ioachimescu AG, Brennan DM, Hoar BM, et al. Serum uric acid is an independent predictor of all-cause mortality in patients at high risk of cardiovascular disease: a preventive cardiology information system (PreCIS) database cohort study. *Arthritis Rheum* 2008;**58**(2):623-30
11. Cannon PJ, Stason WB, Demartini FE, et al. Hyperuricemia in primary and renal hypertension. *N Engl J Med* 1966;**275**(9):457-64
12. Ford ES, Li C, Cook S, et al. Serum concentrations of uric acid and the metabolic syndrome among US children and adolescents. *Circulation* 2007;**115**(19):2526-32
13. Siu YP, Leung KT, Tong MK, et al. Use of allopurinol in slowing the progression of renal disease through its ability to lower serum uric acid level. *Am J Kidney Dis* 2006;**47**(1):51-9
14. Feig DI, Kang DH, Johnson RJ. Uric acid and cardiovascular risk. *N Engl J Med* 2008;**359**(17):1811-21
15. Gagliardi AC, Miname MH, Santos RD. Uric acid: A marker of increased cardiovascular risk. *Atherosclerosis* 2009;**202**(1):11-7
16. Khosla UM, Zharikov S, Finch JL, et al. Hyperuricemia induces endothelial dysfunction. *Kidney Int* 2005;**67**(5):1739-42
17. Kang DH, Park SK, Lee IK, et al. Uric acid-induced C-reactive protein expression: implication on cell proliferation and nitric oxide production of human vascular cells. *J Am Soc Nephrol* 2005;**16**(12):3553-62
18. Yu MA, Sanchez-Lozada LG, Johnson RJ, et al. Oxidative stress with an activation of the renin-angiotensin system in human vascular endothelial cells as a novel mechanism of uric acid-induced endothelial dysfunction. *J Hypertens*

- 2010;**28**(6):1234-42
19. Ross R. Atherosclerosis--an inflammatory disease. *N Engl J Med* 1999;**340**(2):115-26
20. Celermajer DS, Sorensen KE, Gooch VM, et al. Non-invasive detection of endothelial dysfunction in children and adults at risk of atherosclerosis. *Lancet* 1992;**340**(8828):1111-5
21. Benjamin EJ, Larson MG, Keyes MJ, et al. Clinical correlates and heritability of flow-mediated dilation in the community: the Framingham Heart Study. *Circulation* 2004;**109**(5):613-9
22. Idei N, Nishioka K, Soga J, et al. Vascular function and circulating progenitor cells in thromboangitis obliterans (Buerger's disease) and atherosclerosis obliterans. *Hypertension* 2011;**57**(1):70-8
23. Soga J, Noma K, Hata T, et al. Rho-associated kinase activity, endothelial function, and cardiovascular risk factors. *Arterioscler Thromb Vasc Biol* 2011;**31**(10):2353-9
24. Fujimura N, Noma K, Hata T, et al. Mineralocorticoid receptor blocker eplerenone improves endothelial function and inhibits Rho-associated kinase activity in patients with hypertension. *Clin Pharmacol Ther* 2012;**91**(2):289-97
25. Modena MG, Bonetti L, Coppi F, et al. Prognostic role of reversible endothelial dysfunction in hypertensive postmenopausal women. *J Am Coll Cardiol* 2002;**40**(3):505-10
26. Gokce N, Keaney JF, Jr., Hunter LM, et al. Risk stratification for postoperative cardiovascular events via noninvasive assessment of endothelial function: a prospective study. *Circulation* 2002;**105**(13):1567-72
27. Brevetti G, Silvestro A, Schiano V, et al. Endothelial dysfunction and cardiovascular

- 1  
2  
3  
4 risk prediction in peripheral arterial disease: additive value of flow-mediated  
5 dilation to ankle-brachial pressure index. *Circulation* 2003;**108**(17):2093-8  
6  
7  
8  
9 28. Lerman A, Zeiher AM. Endothelial function: cardiac events. *Circulation*  
10 2005;**111**(3):363-8  
11  
12  
13 29. Maxwell AJ, Bruinsma KA. Uric acid is closely linked to vascular nitric oxide  
14 activity. Evidence for mechanism of association with cardiovascular disease. *J*  
15 *Am Coll Cardiol* 2001;**38**(7):1850-8  
16  
17  
18  
19 30. Mercurio G, Vitale C, Cerquetani E, et al. Effect of hyperuricemia upon endothelial  
20 function in patients at increased cardiovascular risk. *Am J Cardiol*  
21 2004;**94**(7):932-5  
22  
23  
24  
25  
26 31. Kato M, Hisatome I, Tomikura Y, et al. Status of endothelial dependent vasodilation  
27 in patients with hyperuricemia. *Am J Cardiol* 2005;**96**(11):1576-8  
28  
29  
30  
31 32. Ho WJ, Tsai WP, Yu KH, et al. Association between endothelial dysfunction and  
32 hyperuricaemia. *Rheumatology (Oxford)* 2010;**49**(10):1929-34  
33  
34  
35 33. Kanbay M, Yilmaz MI, Sonmez A, et al. Serum uric acid level and endothelial  
36 dysfunction in patients with nondiabetic chronic kidney disease. *Am J Nephrol*  
37 2011;**33**(4):298-304  
38  
39  
40  
41 34. Tomiyama H, Higashi Y, Takase B, et al. Relationships among hyperuricemia,  
42 metabolic syndrome, and endothelial function. *Am J Hypertens*  
43 2011;**24**(7):770-4  
44  
45  
46  
47  
48 35. Chobanian AV, Bakris GL, Black HR, et al. The Seventh Report of the Joint  
49 National Committee on Prevention, Detection, Evaluation, and Treatment of  
50 High Blood Pressure: the JNC 7 report. *Jama* 2003;**289**(19):2560-72  
51  
52  
53  
54 36. American Diabetes Association: clinical practice recommendations 1999. *Diabetes*  
55 *Care* 1999;**22 Suppl 1**:S1-114  
56  
57  
58  
59  
60

- 1  
2  
3  
4  
5  
6  
7  
8  
9  
10  
11  
12  
13  
14  
15  
16  
17  
18  
19  
20  
21  
22  
23  
24  
25  
26  
27  
28  
29  
0  
3  
2  
3  
3  
5  
6  
7  
8  
9  
40  
41  
42  
43  
44  
45  
46  
47  
48  
49  
6  
5  
2  
3  
5  
6  
7  
8  
9  
60
37. Executive Summary of The Third Report of The National Cholesterol Education Program (NCEP) Expert Panel on Detection, Evaluation, And Treatment of High Blood Cholesterol In Adults (Adult Treatment Panel III). *Jama* 2001;**285**(19):2486-97
38. Wilson PW, Castelli WP, Kannel WB. Coronary risk prediction in adults (the Framingham Heart Study). *Am J Cardiol* 1987;**59**(14):91G-94G
39. Matsuo S, Imai E, Horio M, et al. Revised equations for estimated GFR from serum creatinine in Japan. *Am J Kidney Dis* 2009;**53**(6):982-92
40. K/DOQI clinical practice guidelines for chronic kidney disease: evaluation, classification, and stratification. *Am J Kidney Dis* 2002;**39**(2 Suppl 1):S1-266
41. McKinlay SM. The normal menopause transition: an overview. *Maturitas* 1996;**23**(2):137-45
42. Coutinho Tde A, Turner ST, Peyser PA, et al. Associations of serum uric acid with markers of inflammation, metabolic syndrome, and subclinical coronary atherosclerosis. *Am J Hypertens* 2007;**20**(1):83-9
43. Ishizaka N, Ishizaka Y, Toda E, et al. Association between serum uric acid, metabolic syndrome, and carotid atherosclerosis in Japanese individuals. *Arterioscler Thromb Vasc Biol* 2005;**25**(5):1038-44
44. Quinones Galvan A, Natali A, Baldi S, et al. Effect of insulin on uric acid excretion in humans. *Am J Physiol* 1995;**268**(1 Pt 1):E1-5
45. Johnson RJ, Kang DH, Feig D, et al. Is there a pathogenetic role for uric acid in hypertension and cardiovascular and renal disease? *Hypertension* 2003;**41**(6):1183-90
46. Bengtsson C, Lapidus L, Stendahl C, et al. Hyperuricaemia and risk of cardiovascular disease and overall death. A 12-year follow-up of participants in

- 1  
2  
3  
4 the population study of women in Gothenburg, Sweden. *Acta Med Scand*  
5 1988;**224**(6):549-55  
6  
7  
8  
9 47. Freedman DS, Williamson DF, Gunter EW, et al. Relation of serum uric acid to  
10 mortality and ischemic heart disease. The NHANES I Epidemiologic Follow-up  
11 Study. *Am J Epidemiol* 1995;**141**(7):637-44  
12  
13  
14 48. Tuttle KR, Short RA, Johnson RJ. Sex differences in uric acid and risk factors for  
15 coronary artery disease. *Am J Cardiol* 2001;**87**(12):1411-4  
16  
17  
18 49. Ames BN, Cathcart R, Schwiers E, et al. Uric acid provides an antioxidant defense  
19 in humans against oxidant- and radical-caused aging and cancer: a hypothesis.  
20 *Proc Natl Acad Sci U S A* 1981;**78**(11):6858-62  
21  
22  
23 50. Nieto FJ, Iribarren C, Gross MD, et al. Uric acid and serum antioxidant capacity: a  
24 reaction to atherosclerosis? *Atherosclerosis* 2000;**148**(1):131-9  
25  
26  
27  
28 51. Celermajer DS, Sorensen KE, Bull C, et al. Endothelium-dependent dilation in the  
29 systemic arteries of asymptomatic subjects relates to coronary risk factors and  
30 their interaction. *J Am Coll Cardiol* 1994;**24**(6):1468-74  
31  
32  
33 52. Lerner DJ, Kannel WB. Patterns of coronary heart disease morbidity and mortality  
34 in the sexes: a 26-year follow-up of the Framingham population. *Am Heart J*  
35 1986;**111**(2):383-90  
36  
37  
38 53. Lieberman EH, Gerhard MD, Uehata A, et al. Estrogen improves  
39 endothelium-dependent, flow-mediated vasodilation in postmenopausal women.  
40 *Ann Intern Med* 1994;**121**(12):936-41  
41  
42  
43 54. Hashimoto M, Akishita M, Eto M, et al. Modulation of endothelium-dependent  
44 flow-mediated dilatation of the brachial artery by sex and menstrual cycle.  
45 *Circulation* 1995;**92**(12):3431-5  
46  
47  
48 55. Nicholls A, Snaith ML, Scott JT. Effect of oestrogen therapy on plasma and urinary  
49  
50  
51  
52  
53  
54  
55  
56  
57  
58  
59  
60

- 1  
2  
3  
4 levels of uric acid. *Br Med J* 1973;**1**(5851):449-51
- 5  
6  
7 56. Hak AE, Choi HK. Menopause, postmenopausal hormone use and serum uric acid  
8 levels in US women--the Third National Health and Nutrition Examination  
9 Survey. *Arthritis Res Ther* 2008;**10**(5):R116
- 10  
11  
12  
13 57. Mumford SL, Dasharathy SS, Pollack AZ, et al. Serum uric acid in relation to  
14 endogenous reproductive hormones during the menstrual cycle: findings from  
15 the BioCycle study. *Hum Reprod* 2013;**28**(7):1853-62
- 16  
17  
18  
19 58. Oikonen M, Wendelin-Saarenhovi M, Lyytikainen LP, et al. Associations between  
20 serum uric acid and markers of subclinical atherosclerosis in young adults. The  
21 cardiovascular risk in Young Finns study. *Atherosclerosis* 2012;**223**(2):497-503
- 22  
23  
24  
25 59. Celermajer DS, Sorensen KE, Spiegelhalter DJ, et al. Aging is associated with  
26 endothelial dysfunction in healthy men years before the age-related decline in  
27 women. *J Am Coll Cardiol* 1994;**24**(2):471-6
- 28  
29  
30  
31 60. Taddei S, Virdis A, Ghiadoni L, et al. Menopause is associated with endothelial  
32 dysfunction in women. *Hypertension* 1996;**28**(4):576-82
- 33  
34  
35  
36  
37  
38  
39  
40  
41  
42  
43  
44  
45  
46  
47  
48  
49  
50  
51  
52  
53  
54  
55  
56  
57  
58  
59  
60

1  
2  
3  
4  
5  
6  
7  
8  
9  
10  
11  
12  
13  
14  
15  
16  
17  
18  
19  
20  
21  
22  
23  
24  
25  
26  
27  
28  
29  
0  
3  
2  
3  
3  
5  
6  
3  
8  
9  
40  
41  
42  
43  
44  
45  
46  
47  
48  
49  
0  
5  
2  
3  
5  
6  
3  
8  
9  
60

**Figure legends**

Figure 1. Bar graphs show flow-mediated vasodilation in women categorized according to serum uric acid level.

For peer review only



1  
2  
3  
4  
5  
6  
7  
8  
9  
10  
11  
12  
13  
14  
15  
16  
17  
18  
19  
20  
21  
22  
23  
24  
25  
26  
27  
28  
29  
0  
3  
2  
3  
3  
5  
6  
3  
8  
9  
40  
41  
42  
43  
44  
45  
46  
47  
48  
49  
6  
5  
2  
3  
5  
6  
3  
8



## Supplemental data

**Hyperuricemia is Independently Associated with Endothelial Dysfunction in Postmenopausal Women but not in Premenopausal Women**

Brief title: Hyperuricemia and endothelial function in women

Tatsuya Maruhashi, MD;<sup>1</sup> Ayumu Nakashima, MD, PhD;<sup>2</sup> Junko Soga MD, PhD;<sup>1</sup> Noritaka Fujimura, MD, PhD;<sup>1</sup> Naomi Idei, MD, PhD;<sup>1</sup> Shinsuke Mikami, MD;<sup>1</sup> Yumiko Iwamoto, MD;<sup>1</sup> Masato Kajikawa, MD;<sup>1</sup> Takeshi Matsumoto, MD;<sup>1</sup> Takayuki Hidaka, MD, PhD;<sup>1</sup> Yasuki Kihara, MD, PhD;<sup>1</sup> Kazuaki Chayama, MD, PhD;<sup>3</sup> Chikara Goto, PhD;<sup>4</sup> Kensuke Noma, MD, PhD;<sup>5</sup> Hirofumi Tomiyama, MD, PhD, FAHA;<sup>6</sup> Bonpei Takase, MD, PhD, FAHA;<sup>7</sup> Akira Yamashina, MD, PhD;<sup>6</sup> Yukihiro Higashi, MD, PhD, FAHA<sup>2,5</sup>

<sup>1</sup>Department of Cardiovascular Medicine, Hiroshima University Graduate School of Biomedical Sciences, Hiroshima, Japan

<sup>2</sup>Division of Regeneration and Medicine, Hiroshima University Hospital, Hiroshima, Japan

<sup>3</sup>Department of Medicine and Molecular Science, Hiroshima University Graduate School of Biomedical Sciences, Hiroshima, Japan

<sup>4</sup>Hiroshima International University, Hiroshima, Japan

<sup>5</sup>Department of Cardiovascular Regeneration and Medicine, Research Institute for Radiation Biology and Medicine, Hiroshima University, Hiroshima, Japan

<sup>6</sup>The Second Department of Internal Medicine, Tokyo Medical University, Tokyo, Japan

<sup>7</sup>Division of Biomedical Engineering, National Defense Medical College Research Institute, Tokorozawa, Japan

Address for corresponding: Yukihiro Higashi, MD, PhD, FAHA

Professor and Chair

Department of Cardiovascular Regeneration and Medicine,

Research Institute for Radiation Biology and Medicine (RIRBM),

Hiroshima University

1-2-3 Kasumi, Minami-ku, Hiroshima 734-8553, Japan

Fax: +81-82-257-5831, Phone: +81-82-257-5831

E-mail: [yhigashi@hiroshima-u.ac.jp](mailto:yhigashi@hiroshima-u.ac.jp)

Table I. Clinical Characteristics of Premenopause and Menopause Women

| Variables                                | Premenopause<br>(n=368) | Postmenopause<br>(n=381) | P value |
|------------------------------------------|-------------------------|--------------------------|---------|
| Age, y                                   | 41.5±6.1                | 58.6±6.3                 | <0.001  |
| Body mass index, kg/m <sup>2</sup>       | 21.4±3.5                | 22.5±3.2                 | <0.001  |
| Systolic blood pressure, mm Hg           | 113.6±14.4              | 128.3±20.2               | <0.001  |
| Diastolic blood pressure, mm Hg          | 70.6±11.3               | 77.9±12.6                | <0.001  |
| Heart rate, bpm                          | 63.5±9.6                | 65.2±10.6                | 0.02    |
| Total cholesterol, mmol/L                | 5.05±0.80               | 5.67±0.84                | <0.001  |
| Triglycerides, mmol/L                    | 0.87±0.59               | 1.25±0.76                | <0.001  |
| HDL-cholesterol, mmol/L                  | 1.82±0.40               | 1.77±0.45                | 0.11    |
| LDL-cholesterol, mmol/L                  | 2.85±0.68               | 3.36±0.78                | <0.001  |
| Glucose, mmol/L                          | 5.09±0.82               | 5.55±1.87                | <0.001  |
| Uric acid, mg/dL                         | 4.24±1.03               | 4.64±1.11                | <0.001  |
| eGFR, mL/min/1.73 m <sup>2</sup>         | 79.2±12.8               | 74.9±13.5                | <0.001  |
| Framingham risk score, %                 | 1.67±1.36               | 6.13±3.77                | <0.001  |
| Hypertension, n (%)                      | 12 (3.3)                | 100 (26.3)               | <0.001  |
| Dyslipidemia, n (%)                      | 65 (17.7)               | 197 (51.7)               | <0.001  |
| Diabetes mellitus, n (%)                 | 8 (2.2)                 | 26 (6.8)                 | 0.002   |
| Smoking, n (%)                           | 34 (9.2)                | 25 (6.6)                 | 0.18    |
| Metabolic syndrome, n (%)                | 17 (4.6)                | 48 (12.6)                | <0.001  |
| Chronic kidney disease, n (%)            | 18 (5.2)                | 38 (11.8)                | 0.002   |
| Endothelial dysfunction, n (%)           | 125 (34.0)              | 253 (66.4)               | <0.001  |
| Flow-mediated vasodilation, %            | 7.77±3.71               | 5.51±3.14                | <0.001  |
| Baseline brachial artery diameter,<br>mm | 3.28±0.41               | 3.52±0.49                | <0.001  |

HDL indicates high-density lipoprotein; LDL, low-density lipoprotein; eGFR, estimated glomerular filtration rate.

## STROBE Statement—checklist of items that should be included in reports of observational studies

|                              | Item No | Recommendation                                                                                                                                                                                                                                                                                                                                                                                                                                                                                                                                                                                                                                                                                   |
|------------------------------|---------|--------------------------------------------------------------------------------------------------------------------------------------------------------------------------------------------------------------------------------------------------------------------------------------------------------------------------------------------------------------------------------------------------------------------------------------------------------------------------------------------------------------------------------------------------------------------------------------------------------------------------------------------------------------------------------------------------|
| <b>Title and abstract</b>    | ①       | (a) Indicate the study's design with a commonly used term in the title or the abstract<br>(b) Provide in the abstract an informative and balanced summary of what was done and what was found                                                                                                                                                                                                                                                                                                                                                                                                                                                                                                    |
| <b>Introduction</b>          |         |                                                                                                                                                                                                                                                                                                                                                                                                                                                                                                                                                                                                                                                                                                  |
| Background/rationale         | ②       | Explain the scientific background and rationale for the investigation being reported                                                                                                                                                                                                                                                                                                                                                                                                                                                                                                                                                                                                             |
| Objectives                   | ③       | State specific objectives, including any prespecified hypotheses                                                                                                                                                                                                                                                                                                                                                                                                                                                                                                                                                                                                                                 |
| <b>Methods</b>               |         |                                                                                                                                                                                                                                                                                                                                                                                                                                                                                                                                                                                                                                                                                                  |
| Study design                 | ④       | Present key elements of study design early in the paper                                                                                                                                                                                                                                                                                                                                                                                                                                                                                                                                                                                                                                          |
| Setting                      | ⑤       | Describe the setting, locations, and relevant dates, including periods of recruitment, exposure, follow-up, and data collection                                                                                                                                                                                                                                                                                                                                                                                                                                                                                                                                                                  |
| Participants                 | ⑥       | (a) <i>Cohort study</i> —Give the eligibility criteria, and the sources and methods of selection of participants. Describe methods of follow-up<br><i>Case-control study</i> —Give the eligibility criteria, and the sources and methods of case ascertainment and control selection. Give the rationale for the choice of cases and controls<br><i>Cross-sectional study</i> —Give the eligibility criteria, and the sources and methods of selection of participants<br>(b) <i>Cohort study</i> —For matched studies, give matching criteria and number of exposed and unexposed<br><i>Case-control study</i> —For matched studies, give matching criteria and the number of controls per case |
| Variables                    | ⑦       | Clearly define all outcomes, exposures, predictors, potential confounders, and effect modifiers. Give diagnostic criteria, if applicable                                                                                                                                                                                                                                                                                                                                                                                                                                                                                                                                                         |
| Data sources/<br>measurement | ⑧*      | For each variable of interest, give sources of data and details of methods of assessment (measurement). Describe comparability of assessment methods if there is more than one group                                                                                                                                                                                                                                                                                                                                                                                                                                                                                                             |
| Bias                         | ⑨       | Describe any efforts to address potential sources of bias                                                                                                                                                                                                                                                                                                                                                                                                                                                                                                                                                                                                                                        |
| Study size                   | ⑩       | Explain how the study size was arrived at                                                                                                                                                                                                                                                                                                                                                                                                                                                                                                                                                                                                                                                        |
| Quantitative variables       | ⑪       | Explain how quantitative variables were handled in the analyses. If applicable, describe which groupings were chosen and why                                                                                                                                                                                                                                                                                                                                                                                                                                                                                                                                                                     |
| Statistical methods          | ⑫       | (a) Describe all statistical methods, including those used to control for confounding<br>(b) Describe any methods used to examine subgroups and interactions<br>(c) Explain how missing data were addressed<br>(d) <i>Cohort study</i> —If applicable, explain how loss to follow-up was addressed<br><i>Case-control study</i> —If applicable, explain how matching of cases and controls was addressed<br><i>Cross-sectional study</i> —If applicable, describe analytical methods taking account of sampling strategy<br>(e) Describe any sensitivity analyses                                                                                                                                |

Continued on next page

**Results**

|                  |       |                                                                                                                                                                                                                                                                                                                                                                                                               |
|------------------|-------|---------------------------------------------------------------------------------------------------------------------------------------------------------------------------------------------------------------------------------------------------------------------------------------------------------------------------------------------------------------------------------------------------------------|
| Participants     | (13)* | (a) Report numbers of individuals at each stage of study—eg numbers potentially eligible, examined for eligibility, confirmed eligible, included in the study, completing follow-up, and analysed<br>(b) Give reasons for non-participation at each stage<br>(c) Consider use of a flow diagram                                                                                                               |
| Descriptive data | (14)* | (a) Give characteristics of study participants (eg demographic, clinical, social) and information on exposures and potential confounders<br>(b) Indicate number of participants with missing data for each variable of interest<br>(c) <i>Cohort study</i> —Summarise follow-up time (eg, average and total amount)                                                                                           |
| Outcome data     | (15)* | <i>Cohort study</i> —Report numbers of outcome events or summary measures over time<br><i>Case-control study</i> —Report numbers in each exposure category, or summary measures of exposure<br><i>Cross-sectional study</i> —Report numbers of outcome events or summary measures                                                                                                                             |
| Main results     | (16)  | (a) Give unadjusted estimates and, if applicable, confounder-adjusted estimates and their precision (eg, 95% confidence interval). Make clear which confounders were adjusted for and why they were included<br>(b) Report category boundaries when continuous variables were categorized<br>(c) If relevant, consider translating estimates of relative risk into absolute risk for a meaningful time period |
| Other analyses   | (17)  | Report other analyses done—eg analyses of subgroups and interactions, and sensitivity analyses                                                                                                                                                                                                                                                                                                                |

**Discussion**

|                  |      |                                                                                                                                                                            |
|------------------|------|----------------------------------------------------------------------------------------------------------------------------------------------------------------------------|
| Key results      | (18) | Summarise key results with reference to study objectives                                                                                                                   |
| Limitations      | (19) | Discuss limitations of the study, taking into account sources of potential bias or imprecision. Discuss both direction and magnitude of any potential bias                 |
| Interpretation   | (20) | Give a cautious overall interpretation of results considering objectives, limitations, multiplicity of analyses, results from similar studies, and other relevant evidence |
| Generalisability | (21) | Discuss the generalisability (external validity) of the study results                                                                                                      |

**Other information**

|         |      |                                                                                                                                                               |
|---------|------|---------------------------------------------------------------------------------------------------------------------------------------------------------------|
| Funding | (22) | Give the source of funding and the role of the funders for the present study and, if applicable, for the original study on which the present article is based |
|---------|------|---------------------------------------------------------------------------------------------------------------------------------------------------------------|

\*Give information separately for cases and controls in case-control studies and, if applicable, for exposed and unexposed groups in cohort and cross-sectional studies.

**Note:** An Explanation and Elaboration article discusses each checklist item and gives methodological background and published examples of transparent reporting. The STROBE checklist is best used in conjunction with this article (freely available on the Web sites of PLoS Medicine at <http://www.plosmedicine.org/>, Annals of Internal Medicine at <http://www.annals.org/>, and Epidemiology at <http://www.epidem.com/>). Information on the STROBE Initiative is available at [www.strobe-statement.org](http://www.strobe-statement.org).
